# Supplementary material
Source: PubMed Central journal article supplement (PMC2782534)

**Palladium-catalyzed Enantioselective  $\alpha$ -arylation and  $\alpha$ -vinylation of Oxindoles  
Facilitated by an Axially Chiral P-Stereogenic Ligand**

Alexander M. Taylor, Ryan A. Altman, and Stephen L. Buchwald\*

Department of Chemistry, Massachusetts Institute of Technology,  
77 Massachusetts Avenue, Cambridge, Massachusetts 02139

*Supporting Information*

Further reports of the enantioselective  $\alpha$ -arylation and  $\alpha$ -vinylation of ketone enolates:

- (a) Hamada, T.; Chieffi, A.; Åhman, J.; Buchwald, S. L. *J. Am. Chem. Soc.* **2002**, *124*, 1261.
- (b) Chieffi, A.; Kamikawa, K.; Åhman, J.; Fox, J. M.; Buchwald, S. L. *Org. Lett.* **2001**, *3*, 1897.
- (c) Åhman, J.; Wolfe, J. P.; Troutman, M. V.; Palucki, M.; Buchwald, S. L. *J. Am. Chem. Soc.* **1998**, *120*, 1918.

Further reports of the enantioselective formation of 3,3-disubstituted oxindoles with quaternary carbon centers:

- (a) Trost, B. M.; Zhang, Y. *J. Am. Chem. Soc.* **2006**, *128*, 4590.
- (b) Trost, B. M.; Brennan, M. K. *Org. Lett.* **2006**, *8*, 2027.
- (c) Arao, T.; Kondo, K.; Aoyama, T. *Chem. Pharm. Bull.* **2006**, *54*, 1743.
- (d) Arao, T.; Sato, K.; Kondo, K.; Aoyama, T. *Chem. Pharm. Bull.* **2006**, *54*, 1576.
- (e) Arao, T.; Kondo, K.; Aoyama, T. *Tet. Lett.* **2006**, *47*, 1417.
- (f) Trost, B. M.; Frederiksen, M. U. *Angew. Chem., Int. Ed.* **2005**, *44*, 308.
- (g) Hills, I. D.; Fu, G. C. *Angew. Chem., Int. Ed.* **2003**, *41*, 3921.
- (h) Glorius, F.; Altenhoff, G.; Goddard, R.; Lehmann, C. *Chem. Commun.* **2002**, 2704.
- (i) Lee, S.; Hartwig, J. F. *J. Org. Chem.* **2001**, *66*, 3402.

Further reports of the enantioselective formation of 3,3-disubstituted oxindoles bearing heteroatoms:

- (a) Ishimaru, T.; Shibata, N.; Nagai, J.; Nakamura, S.; Toru, T.; Kanemasa, S. *J. Am. Chem. Soc.* **2006**, *128*, 16488.
- (b) Hamashima, Y.; Suzuki, T.; Takano, H.; Shimura, Y.; Sodeoka, M. *J. Am. Chem. Soc.* **2005**, *127*, 10164.
- (c) Shibata, N.; Ishimaru, T.; Suzuki, E.; Kirk, K. L. *J. Org. Chem.* **2003**, *68*, 2494.

### General Reagent Information

3-methyloxindole was purchased from Aldrich and used as delivered. 1,3-dimethyloxindole, 3-benzyl-1-methyloxindole, and 5-methoxy-1,3-dimethyloxindole were prepared as previously described.<sup>1,2,3</sup> 1-(4-methoxyphenyl)-3-methyloxindole was prepared as described below. TMEDA•PdMe<sub>2</sub> was prepared as previously described<sup>4</sup> and stored at 4 °C. NaO<sup>t</sup>Bu was purchased from Aldrich Chemical Co. and stored in a N<sub>2</sub> glovebox. Small portions (~1 g) were removed from the glove box in glass vials, weighed in the air, and stored in a desiccator filled with anhydrous calcium sulfate. Ligand **1** was synthesized as previously described.<sup>5</sup> All reagents were weighed in air with no use of a glove box. All other reagents, including aryl and vinyl bromides, were purchased from Aldrich Chemical Co., Alfa Aesar, or TCI America and used as received, with the exception of  $\beta$ -bromostyrene, which was passed through silica gel before use, and 2,5-dimethylaniline, which was distilled before use. Cyclohexane was purchased from Aldrich Chemical Co. in a Sure-Seal bottle and degassed by sparging with Argon prior to use.

### General Analytical Information

All new compounds were characterized by <sup>1</sup>H NMR, <sup>13</sup>C NMR, IR spectroscopy, melting point (where applicable), optical rotation (where applicable), HPLC, GC, and elemental analysis. Gas chromatographic analyses were performed on a Hewlett-Packard 6890 gas chromatograph with an FID detector and a 25m x 0.20 mm capillary

<sup>1</sup> Shaw, S. A.; Aleman, P.; Christy, J.; Kampf, J. W.; Va, P.; Vedejs, E. *J. Am. Chem. Soc.* **2006**, *128*, 925.

<sup>2</sup> Trost, B. M.; Zhang, Y. *J. Am. Chem. Soc.* **2006**, *128*, 4590.

<sup>3</sup> Angelovski, G.; Keränen, M. D.; Linnepe, P.; Grudzielanek, S.; Eilbracht, P. *Adv. Synth. Catal.* **2006**, *348*, 1193.

<sup>4</sup> Biscoe, M. R.; Fors, B. P.; Buchwald, S. L. *J. Am. Chem. Soc.* **2008**, *130*, 6686.

<sup>5</sup> Hamada, T.; Buchwald, S. L. *Org. Lett.* **2002**, *4*, 999.

column with cross-linked methyl siloxane as the stationary phase.  $^1\text{H}$  NMR and  $^{13}\text{C}$  NMR spectra are included for all compounds and were recorded on a Bruker 400 MHz or a Varian 500 MHz instrument. All  $^1\text{H}$  NMR spectra are reported in parts per million (ppm) downfield of TMS and were referenced to the signal for  $\text{CHCl}_3$  (7.26 ppm). All  $^{13}\text{C}$  NMR spectra were reported in ppm relative to residual  $\text{CHCl}_3$  (77.0 ppm) and were obtained with  $^1\text{H}$  decoupling. Infrared spectra were recorded on a Perkin-Elmer Model 2000 FT-IR using KBr plates (thin film). Optical rotations were measured on a Jasco P-1010 polarimeter using a Na lamp (589 nm) at 21-22 °C. (The concentration of the samples is given in g 100 mL $^{-1}$ .) HPLC analyses were carried out on an Agilent 1100 Series system with Daicel Chiralcel®, Chiralpak®, or Regis Technologies, Inc. WHELK columns (4.6 mm x 250 mm) in hexanes/ $^i$ PrOH mixtures. The HPLC spectra of all compounds were compared to those of corresponding authentic racemic compounds. Representative HPLC traces are included for several compounds from these studies. Elemental analyses were performed by Atlantic Microlab Inc., Norcross, GA. Melting points were obtained on a Mel-Temp capillary melting point apparatus. The yields reported in table 1 and figure 2 refer to isolated yields and represent an average of two independent runs. Reported compounds are estimated to be >95% pure as determined by  $^1\text{H}$  NMR and GC analysis and/or combustion analysis.

### Synthesis of starting material

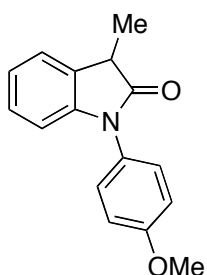

**1-(4-methoxyphenyl)-3-methyloxindole** (Table 2) A Schlenk tube was charged with 3-methyloxindole (2.94 g, 20 mmol, 1 equiv), 4-iodoanisole (5.62 g, 24 mmol, 1.2 equiv), CuI (191 mg, 1 mmol, 0.05 equiv),  $\text{K}_2\text{CO}_3$  (5.53 g, 40 mmol, 2 equiv), and a stirbar before being sealed with a rubber septum. The vessel was evacuated and purged with argon (this sequence was repeated two additional times) before the addition of *N,N*-dimethylcyclohexane-1,2-diamine (315  $\mu\text{L}$ , 2 mmol, 0.1 equiv) and 1,4-dioxane (20 mL, [oxindole] = 1 M). The rubber septum was replaced with a glass stopper under positive argon pressure, and the mixture was stirred at 110 °C for 20 h. Following cooling, the mixture was diluted with EtOAc, filtered through a pad of silica gel, and concentrated *in vacuo*. The residue was purified by column chromatography with a Biotage. The title compound was isolated as a white solid (3.21 g, 63%).  $^1\text{H}$  NMR (400 MHz,  $\text{CDCl}_3$ )  $\delta$ : 7.33 (m, 3H), 7.22 (t,  $J$  = 7.68 Hz, 1H), 7.10 (t,  $J$  = 7.36 Hz, 1H), 7.05 (d,  $J$  = 8.8 Hz, 2H), 6.77 (d,  $J$  = 7.76 Hz, 1H), 3.85 (s, 3H), 3.64 (q,  $J$  = 7.6, 15.16 Hz, 1H), 1.60 (d,  $J$  = 7.6 Hz, 3H) ppm.  $^{13}\text{C}$  NMR (400 MHz,  $\text{CDCl}_3$ )  $\delta$ : 178.1, 158.9, 144.2, 130.3, 127.8, 127.6, 127.0, 127.6, 127.6, 123.6, 122.6, 114.8, 109.0, 55.4, 40.6, 15.6 ppm. IR (neat,  $\text{cm}^{-1}$ ): 3053.2, 2971.0, 2933.9, 2837.9, 1718.8, 1611.5, 1586.3, 1514.1, 1484.6, 1464.7, 1375.8, 1329.3, 1298.8, 1249.9, 1209.1, 1173.9, 1102.1, 1061.8, 1032.0. Anal. Calc. for  $\text{C}_{16}\text{H}_{14}\text{NO}_2$ : C, 75.87; H, 5.97. Found: C, 75.98; H, 5.95. M. P.: 80 °C.

### Experimental procedures for examples described in Figure 1, Table 1, and Figure 2

**General procedure:** All reactions were conducted in disposable resealable glass vials fitted with Teflon-lined screw caps. One of these tubes, equipped with a magnetic stir bar, was charged with the oxindole (0.75 mmol, 1.5 equiv), TMEDA•PdMe $_2$  (5.1 mg, 0.02 mmol, 4 mol%), ligand **1** (9.2 mg, 0.02 mmol, 4 mol%), NaO $^t$ Bu (96 mg, 1.0 mmol, 2 equiv) and, when applicable, solid aryl bromide (0.5 mmol, 1.0 equiv) before being sealed with the teflon-lined screw cap. The vessel was evacuated and backfilled with argon (this sequence was repeated two additional times) before the aryl bromide or vinyl bromide was added via syringe through the septum (when applicable). Cyclohexane (1 mL, [aryl halide] = 0.5 M) was added immediately via syringe through the septum, and the reaction was stirred in an oil bath at the temperature described for 24 h. The reaction vessel was then cooled to room temperature, and dodecane (100  $\mu\text{L}$ ) was added as an internal standard. The crude reaction was diluted with EtOAc (~1 mL), filtered through a Si-gel plug, eluted with EtOAc (~3 mL), and analyzed by GC.<sup>6</sup> Following concentration *in vacuo*, the

<sup>6</sup> Note: Under the reaction conditions, the oxindole substrates were deprotonated and were not in solution. Following workup, a small amount (~ 5%) of the neutral starting material oxindole was observed in the filtrate (GC,

mixture was purified with a Biotage SP4 (silica-packed SNAP-10g, SNAP-25g, or 25+M columns; EtOAc/hexanes) to provide the product described.

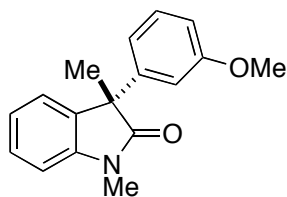

**3-(3-methoxyphenyl)-1,3-dimethylindolin-2-one** (Figure 1) The reaction was conducted according to the general procedure to afford the title compound as a clear oil (103 mg, 77%). <sup>1</sup>H NMR (400 MHz, CDCl<sub>3</sub>) δ: 7.34 (dt, *J* = 1.3, 7.7, 7.7 Hz, 1H), 7.22 (m, 2H), 7.12 (dt, *J* = 1, 7.6, 7.6 Hz, 1H), 6.91 (m, 3H), 6.8 (ddd, *J* = 0.8, 2.5, 8.2 Hz, 1H), 3.76 (s, 3H), 3.24 (s, 3H), 1.79 (s, 3H) ppm. <sup>13</sup>C NMR (400 MHz, CDCl<sub>3</sub>) δ: 179.1, 159.5, 143.0, 142.3, 134.6, 129.4, 128.0, 124.0, 122.7, 118.9, 113.1, 111.9, 108.2, 55.0, 52.0, 26.3, 23.6 ppm. IR (neat, cm<sup>-1</sup>): 2968.0, 2934.7, 2834.8, 1715.5, 1611.6, 1582.3, 1492.5, 1470.6, 1432.5, 1373.6, 1344.8, 1292.3, 1256.6, 1160.0, 1102.6, 1043.1, 1024.1. Enantiomeric excess: 97%, Chiralcel OD-H column, 10% <sup>i</sup>PrOH, 90% hexanes; *t*<sub>minor</sub> = 9.738 min, *t*<sub>major</sub> = 8.356 min; [α]<sub>D</sub><sup>22</sup> -110.5 ° (c 0.35, CHCl<sub>3</sub>).

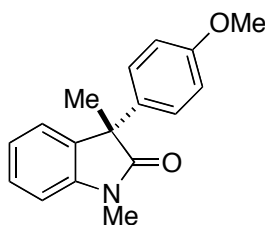

**3-(4-methoxyphenyl)-1,3-dimethylindolin-2-one** (2, Table 1, entry 1)<sup>7</sup> The reaction was conducted according to the general procedure to yield the title compound as an oil that turned into an off-white solid on sitting (114 mg, 85%). <sup>1</sup>H NMR (400 MHz, CDCl<sub>3</sub>) δ: 7.35 (td, *J* = 1.4, 7.7, 7.7 Hz, 1H), 7.26 (dt, *J* = 3.4, 3.4, 10.2 Hz, 2H), 7.21 (dq, *J* = 0.5, 1.3, 7.4 Hz, 1H), 7.13 (td, *J* = 1, 7.5, 7.5 Hz, 1H), 6.93 (d, *J* = 7.8 Hz, 1H), 6.85 (dt, *J* = 3.2, 3.2, 9.9 Hz, 2H), 3.76 (s, 3H), 3.24 (s, 3H), 1.78 (s, 3H) ppm. <sup>13</sup>C NMR (400 MHz, CDCl<sub>3</sub>) δ: 179.5, 158.6, 143.1, 134.8, 132.7, 127.9, 127.6, 124.0, 122.6, 113.7, 108.2, 55.1, 51.3, 26.3, 23.8 ppm. IR (neat, cm<sup>-1</sup>): 2932.9, 1714.5, 1610.8, 1511.4, 1492.9, 1470.0, 1384.1, 1373.4, 1344.0, 1303.8, 1251.0, 1181.8, 1147.0, 1096.7, 1030.5. Enantiomeric excess: 95%, Chiralpak AD-H column, 10% <sup>i</sup>PrOH, 90% hexanes; *t*<sub>minor</sub> = 11.324 min, *t*<sub>major</sub> = 8.960 min; [α]<sub>D</sub><sup>21</sup> -122.6 ° (c 0.34, CHCl<sub>3</sub>). M. P.: 144 °C.

---

NMR). In most cases, this oxindole was readily separated from the desired product by chromatography. When the two were not separable, however, the remaining starting material oxindole was oxidized *in situ* during the workup by opening the reaction vessel and stirring the crude mixture in air for 30 minutes before filtration through silica gel. The oxidized starting material was then no longer observed in the crude filtrate, which was otherwise treated as described above.

<sup>7</sup> Arao, T.; Sato, K.; Kondo, K.; Aoyama, T. *Chem. Pharm Bull.* **2006**, *54*, 1576.

Data File C:\CHEM32\2\DATA\AMT\AMT4-41-1.D  
Sample Name: AMT4-41-1

=====  
Acq. Operator : AMT  
Acq. Instrument : Instrument 2 Location : Vial 1  
Injection Date : 4/7/2009 2:37:48 PM Inj Volume : 1 µl  
Acq. Method : C:\CHEM32\1\METHODS\AMTSTANDARD.M  
Last changed : 4/7/2009 2:33:46 PM by AMT  
(modified after loading)  
Analysis Method : C:\CHEM32\2\DATA\AMT\AMT4-41-1.D\DA.M (AMTSTANDARD.M)  
Last changed : 6/17/2009 7:20:00 PM by ELLIOT  
(modified after loading)  
Sample Info : AD-H 10% IPA IN HEXANES 1.0 ML/MIN

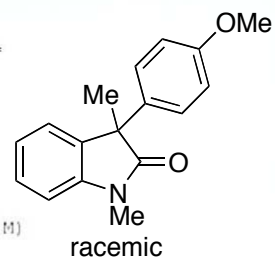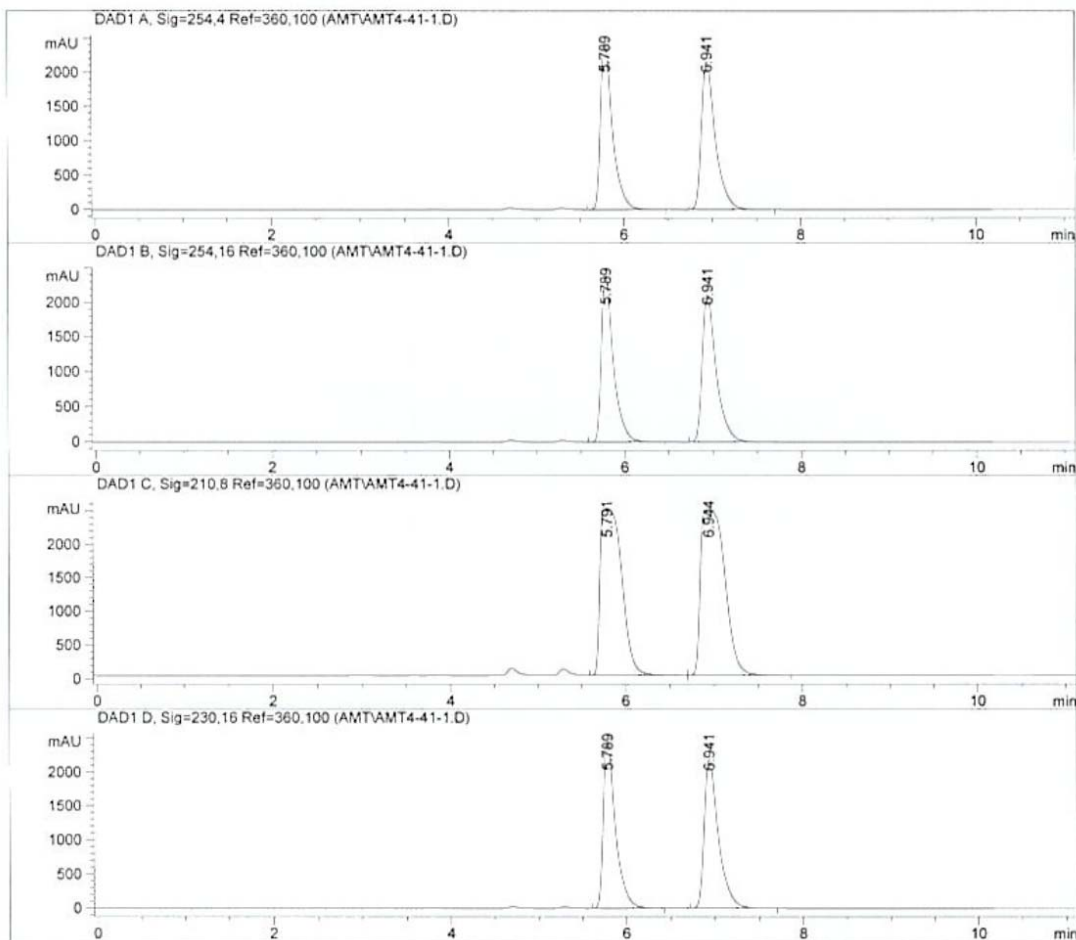

Data File C:\CHEM32\2\DATA\AMT\AMT4-41-1.D  
 Sample Name: AMT4-41-1

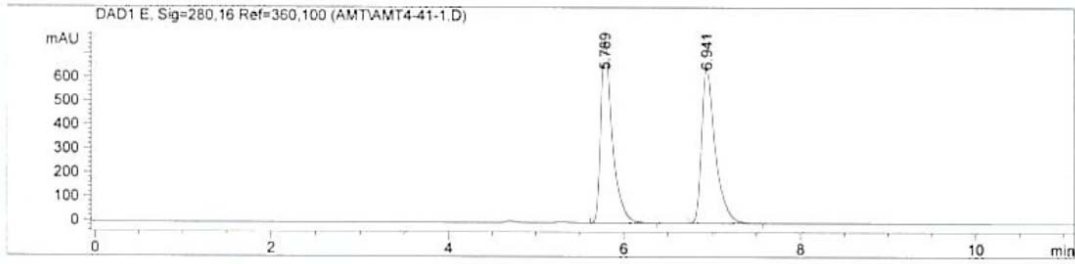

=====  
 Area Percent Report  
 =====

Sorted By : Signal  
 Multiplier : 1.0000  
 Dilution : 1.0000  
 Sample Amount : 1.00000 [ng/ul] (not used in calc.)  
 Use Multiplier & Dilution Factor with ISTDs

Signal 1: DAD1 A, Sig=254,4 Ref=360,100

| Peak #   | RetTime [min] | Type | Width [min] | Area [mAU*s] | Height [mAU] | Area %  |
|----------|---------------|------|-------------|--------------|--------------|---------|
| 1        | 5.789         | VB   | 0.1430      | 2.31518e4    | 2433.19312   | 49.4850 |
| 2        | 6.941         | BB   | 0.1636      | 2.36338e4    | 2161.04834   | 50.5150 |
| Totals : |               |      |             | 4.67856e4    | 4594.24146   |         |

Signal 2: DAD1 B, Sig=254,16 Ref=360,100

| Peak #   | RetTime [min] | Type | Width [min] | Area [mAU*s] | Height [mAU] | Area %  |
|----------|---------------|------|-------------|--------------|--------------|---------|
| 1        | 5.789         | VB   | 0.1423      | 2.25958e4    | 2390.47144   | 49.5407 |
| 2        | 6.941         | BB   | 0.1632      | 2.30148e4    | 2111.41211   | 50.4593 |
| Totals : |               |      |             | 4.56106e4    | 4501.88354   |         |

Signal 3: DAD1 C, Sig=210,8 Ref=360,100

| Peak #   | RetTime [min] | Type | Width [min] | Area [mAU*s] | Height [mAU] | Area %  |
|----------|---------------|------|-------------|--------------|--------------|---------|
| 1        | 5.791         | VV   | 0.2756      | 4.21172e4    | 2486.60913   | 47.4948 |
| 2        | 6.944         | VB   | 0.3058      | 4.65602e4    | 2470.89551   | 52.5052 |
| Totals : |               |      |             | 8.86774e4    | 4957.50464   |         |

Data File C:\CHEM32\2\DATA\AMT\AMT4-41-1.D  
Sample Name: AMT4-41-1

Signal 4: DAD1 D, Sig=230,16 Ref=360,100

| Peak # | RetTime [min] | Type | Width [min] | Area [mAU*s] | Height [mAU] | Area %  |
|--------|---------------|------|-------------|--------------|--------------|---------|
| 1      | 5.789         | BB   | 0.1443      | 2.36273e4    | 2455.05786   | 49.4025 |
| 2      | 6.941         | BB   | 0.1652      | 2.41988e4    | 2185.16113   | 50.5975 |

Totals :                   4.78261e4 4640.21899

Signal 5: DAD1 E, Sig=280,16 Ref=360,100

| Peak # | RetTime [min] | Type | Width [min] | Area [mAU*s] | Height [mAU] | Area %  |
|--------|---------------|------|-------------|--------------|--------------|---------|
| 1      | 5.789         | BB   | 0.1337      | 6908.16895   | 762.62616    | 49.9366 |
| 2      | 6.941         | BB   | 0.1586      | 6925.70947   | 648.27563    | 50.0634 |

Totals :                   1.38339e4 1410.90179

=====  
\*\*\* End of Report \*\*\*

Data File C:\CHEM32\1\DATA\AMT\AMT4-64C.D  
Sample Name: AMT4-64C

=====  
Acq. Operator : AMT  
Acq. Instrument : Instrument 1 Location : Vial 1  
Injection Date : 4/28/2009 11:22:04 AM Inj Volume : 1 µl  
  
Acq. Method : C:\CHEM32\1\METHODS\AMH.M  
Last changed : 4/28/2009 10:49:19 AM by QINGLE  
(modified after loading)  
Analysis Method : C:\CHEM32\1\DATA\AMT\AMT4-64C.D\DA.M (AMH.M)  
Last changed : 4/28/2009 11:35:56 AM by AMT  
Sample Info : AD-H, 10% IPA 1 ML/MIN

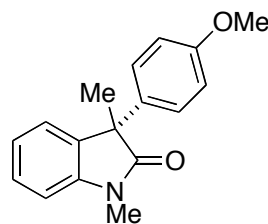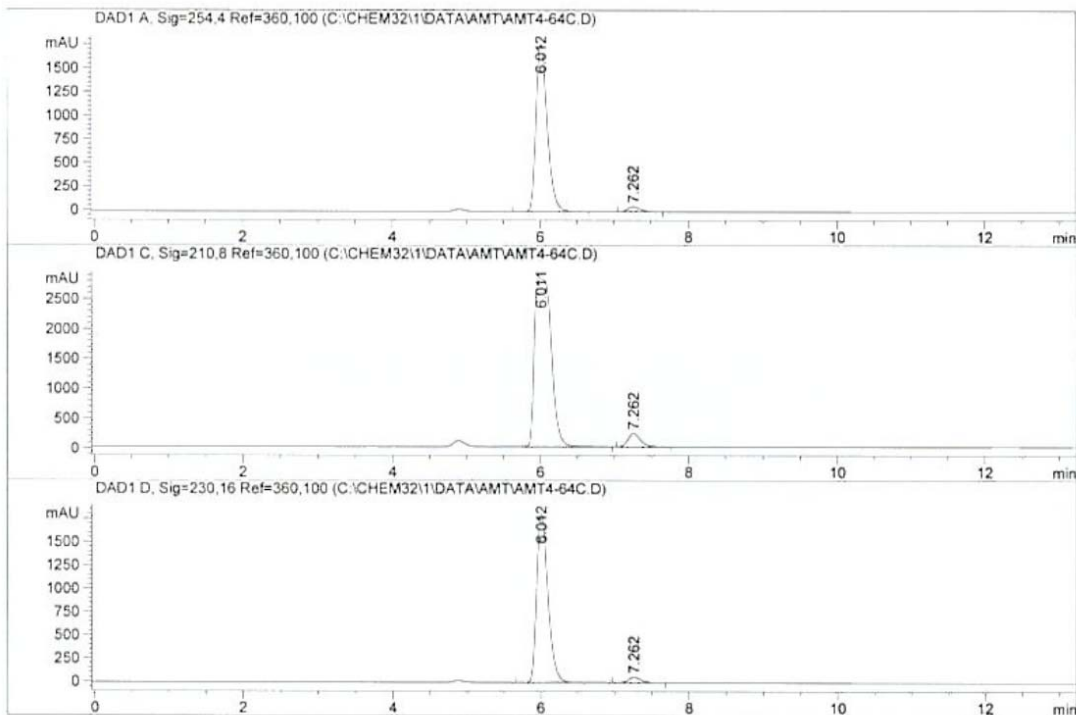

=====  
Area Percent Report  
=====

Sorted By : Signal  
Multiplier : 1.0000  
Dilution : 1.0000  
Sample Amount : 1.00000 [ng/ul] (not used in calc.)  
Use Multiplier & Dilution Factor with ISTDs

Data File C:\CHEM32\1\DATA\AMT\AMT4-64C.D  
Sample Name: AMT4-64C

Signal 1: DAD1 A, Sig=254,4 Ref=360,100

| Peak # | RetTime [min] | Type | Width [min] | Area [mAU*s] | Height [mAU] | Area %  |
|--------|---------------|------|-------------|--------------|--------------|---------|
| 1      | 6.012         | BB   | 0.1634      | 1.87781e4    | 1774.71399   | 96.8791 |
| 2      | 7.262         | BB   | 0.1762      | 604.91840    | 52.60750     | 3.1209  |

Totals : 1.93830e4 1827.32149

Signal 2: DAD1 C, Sig=210,8 Ref=360,100

| Peak # | RetTime [min] | Type | Width [min] | Area [mAU*s] | Height [mAU] | Area %  |
|--------|---------------|------|-------------|--------------|--------------|---------|
| 1      | 6.011         | VB   | 0.2549      | 4.45002e4    | 2807.26465   | 94.4727 |
| 2      | 7.262         | BB   | 0.1805      | 2603.56885   | 222.52574    | 5.5273  |

Totals : 4.71038e4 3029.79039

Signal 3: DAD1 D, Sig=230,16 Ref=360,100

| Peak # | RetTime [min] | Type | Width [min] | Area [mAU*s] | Height [mAU] | Area %  |
|--------|---------------|------|-------------|--------------|--------------|---------|
| 1      | 6.012         | BB   | 0.1635      | 1.91229e4    | 1806.28406   | 96.7333 |
| 2      | 7.262         | BB   | 0.1782      | 645.77582    | 55.31314     | 3.2667  |

Totals : 1.97686e4 1861.59720

=====  
\*\*\* End of Report \*\*\*



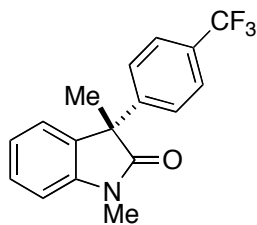

**3-(4-trifluoromethylphenyl)-1,3-dimethylindolin-2-one** (Table 1, entry 2)<sup>2</sup> The reaction was conducted according to the general procedure to yield the title compound as a white solid (100 mg, 66%). <sup>1</sup>H NMR (400 MHz, CDCl<sub>3</sub>) δ: 7.57 (dt, *J* = 0.6, 0.6, 8.3 Hz, 2H), 7.46 (dd, *J* = 0.6, 8.8 Hz, 2H), 7.39 (dt, *J* = 1.4, 7.8, 7.8, 2H), 7.21 (ddd, *J* = 0.5, 1.4, 7.4 Hz, 1H), 7.15 (dt, *J* = 1, 7.5, 7.5 Hz, 1H), 6.97 (d, *J* = 7.6 Hz, 1H), 3.26 (s, 3H), 1.82 (s, 3H) ppm. <sup>13</sup>C NMR (400 MHz, CDCl<sub>3</sub>) δ: 178.6, 144.7, 143.1, 133.8, 129.5, 129.2, 128.5, 127.1, 125.4 (q, *J* = 14.6, 29.4 Hz), 124.1, 122.9, 122.6, 108.5, 52.0, 26.5, 23.7 ppm. <sup>19</sup>F NMR (400 MHz, CDCl<sub>3</sub>) δ: 62.9 ppm. IR (neat, cm<sup>-1</sup>): 2974.1, 2935.9, 1718.1, 1612.3, 1493.7, 1472.2, 1410.4, 1375.7, 1347.0, 1328.2, 1166.8, 1123.0, 1096.34, 1075.9, 1016.8. Enantiomeric excess: 95%, Chiralpak AD-H column, 10% <sup>i</sup>PrOH, 90% hexanes; *t*<sub>minor</sub> = 6.856 min, *t*<sub>major</sub> = 5.749 min; [α]<sub>D</sub><sup>22</sup> -1.35 ° (c 0.316, CHCl<sub>3</sub>). Anal. Calc. for C<sub>17</sub>H<sub>14</sub>F<sub>3</sub>NO: C, 66.88; H, 4.62. Found: C, 66.93; H, 4.65. M. P.: 84 °C.

Data File C:\CHEM32\2\DATA\AMT\AMT4-41-2.D  
Sample Name: AMT4-41-2

=====

|                 |                                                          |            |          |
|-----------------|----------------------------------------------------------|------------|----------|
| Acq. Operator   | : AMT                                                    | Location   | : Vial 2 |
| Acq. Instrument | : Instrument 2                                           | Inj Volume | : 1 µl   |
| Injection Date  | : 4/7/2009 2:16:17 PM                                    |            |          |
| Acq. Method     | : C:\CHEM32\1\METHODS\AMTSTANDARD.M                      |            |          |
| Last changed    | : 4/7/2009 2:31:02 PM by AMT<br>(modified after loading) |            |          |
| Analysis Method | : C:\CHEM32\2\DATA\AMT\AMT4-41-2.D\DA.M (AMTSTANDARD.M)  |            |          |
| Last changed    | : 4/7/2009 2:33:44 PM by AMT                             |            |          |
| Sample Info     | : AD-H 10% IPA IN HEXANES 1.0 ML/MIN                     |            |          |

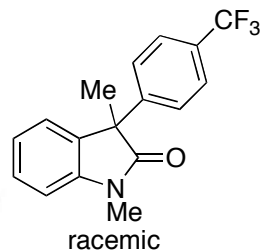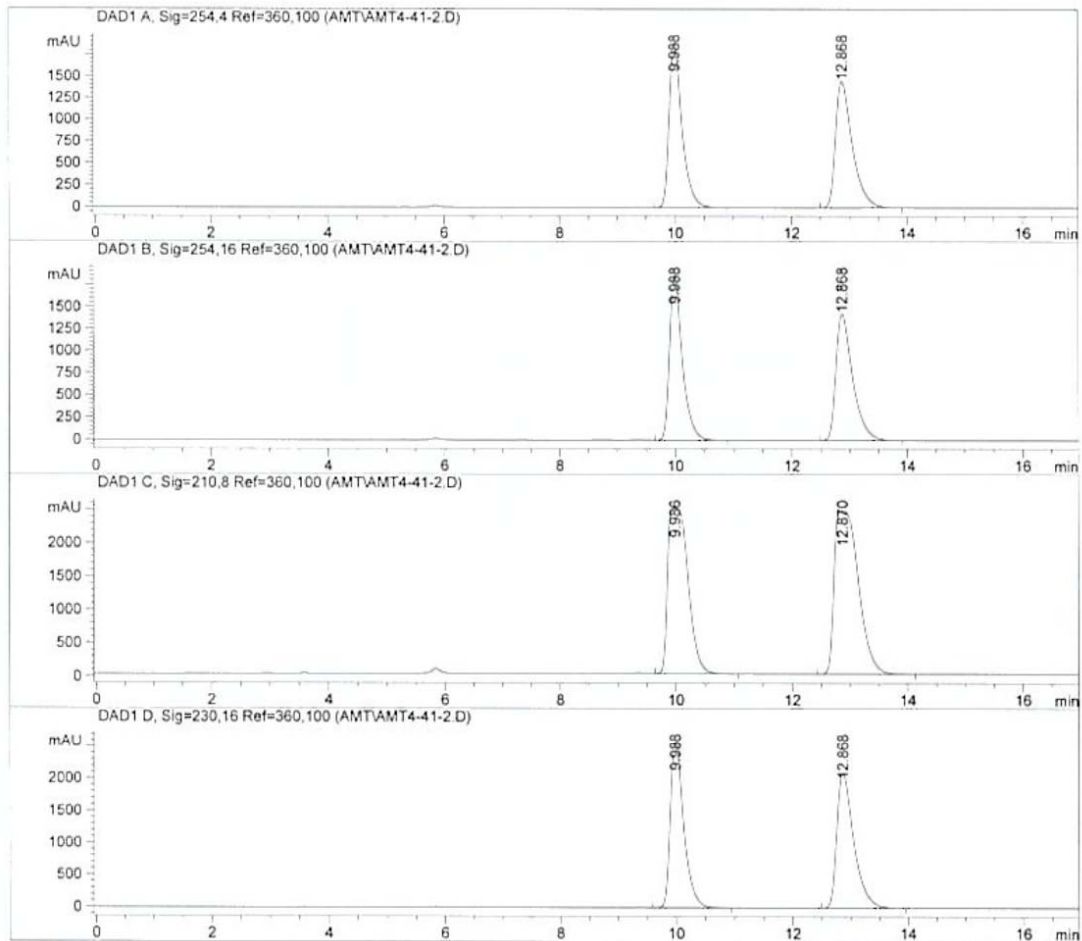

Data File C:\CHEM32\2\DATA\AMT\AMT4-41-2.D  
 Sample Name: AMT4-41-2

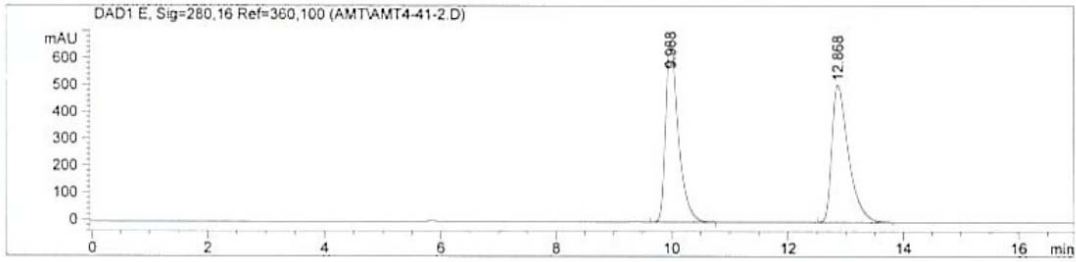

=====  
 Area Percent Report  
 =====

Sorted By : Signal  
 Multiplier : 1.0000  
 Dilution : 1.0000  
 Sample Amount : 1.00000 [ng/ul] (not used in calc.)  
 Use Multiplier & Dilution Factor with ISTDs

Signal 1: DAD1 A, Sig=254,4 Ref=360,100

| Peak # | RetTime [min] | Type | Width [min] | Area [mAU*s] | Height [mAU] | Area %  |
|--------|---------------|------|-------------|--------------|--------------|---------|
| 1      | 9.988         | VB   | 0.2276      | 2.88810e4    | 1896.94104   | 49.8181 |
| 2      | 12.868        | BB   | 0.3017      | 2.90919e4    | 1452.16882   | 50.1819 |

Totals : 5.79728e4 3349.10986

Signal 2: DAD1 B, Sig=254,16 Ref=360,100

| Peak # | RetTime [min] | Type | Width [min] | Area [mAU*s] | Height [mAU] | Area %  |
|--------|---------------|------|-------------|--------------|--------------|---------|
| 1      | 9.988         | VB   | 0.2275      | 2.83379e4    | 1863.01538   | 49.8305 |
| 2      | 12.868        | BB   | 0.3017      | 2.85306e4    | 1424.43042   | 50.1695 |

Totals : 5.68685e4 3287.44580

Signal 3: DAD1 C, Sig=210,8 Ref=360,100

| Peak # | RetTime [min] | Type | Width [min] | Area [mAU*s] | Height [mAU] | Area %  |
|--------|---------------|------|-------------|--------------|--------------|---------|
| 1      | 9.986         | VB   | 0.3317      | 5.98217e4    | 2477.47412   | 45.9483 |
| 2      | 12.870        | BB   | 0.4558      | 7.03719e4    | 2445.18311   | 54.0517 |

Totals : 1.30194e5 4922.65723

Data File C:\CHEM32\2\DATA\AMT\AMT4-41-2.D  
Sample Name: AMT4-41-2

Signal 4: DAD1 D, Sig=230,16 Ref=360,100

| Peak # | RetTime [min] | Type | Width [min] | Area [mAU*s] | Height [mAU] | Area %  |
|--------|---------------|------|-------------|--------------|--------------|---------|
| 1      | 9.988         | VB   | 0.2426      | 4.13541e4    | 2586.09985   | 49.2967 |
| 2      | 12.868        | BB   | 0.3072      | 4.25342e4    | 2092.38477   | 50.7033 |

Totals :                   8.38883e4 4678.48462

Signal 5: DAD1 E, Sig=280,16 Ref=360,100

| Peak # | RetTime [min] | Type | Width [min] | Area [mAU*s] | Height [mAU] | Area %  |
|--------|---------------|------|-------------|--------------|--------------|---------|
| 1      | 9.988         | VB   | 0.2253      | 1.01391e4    | 674.62262    | 49.9725 |
| 2      | 12.868        | BB   | 0.3009      | 1.01503e4    | 508.46445    | 50.0275 |

Totals :                   2.02894e4 1183.08707

=====  
\*\*\* End of Report \*\*\*

Data File C:\CHEM32\1\DATA\AMT\AMT4-64A-2.D  
Sample Name: AMT4-64A-2

=====  
Acq. Operator : AMT  
Acq. Instrument : Instrument 1 Location : Vial 1  
Injection Date : 4/29/2009 5:15:55 PM Inj Volume : 0.5 ul  
Acq. Method : C:\CHEM32\1\METHODS\AMH.M  
Last changed : 4/29/2009 5:07:40 PM by AMT  
(modified after loading)  
Analysis Method : C:\CHEM32\1\DATA\AMT\AMT4-64A-2.D\DA.M (AMH.M)  
Last changed : 4/29/2009 5:30:57 PM by AMT  
Sample Info : OD-H 20% IPA 1ML/MIN

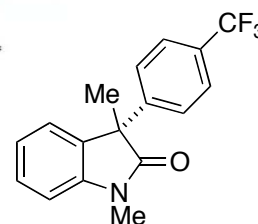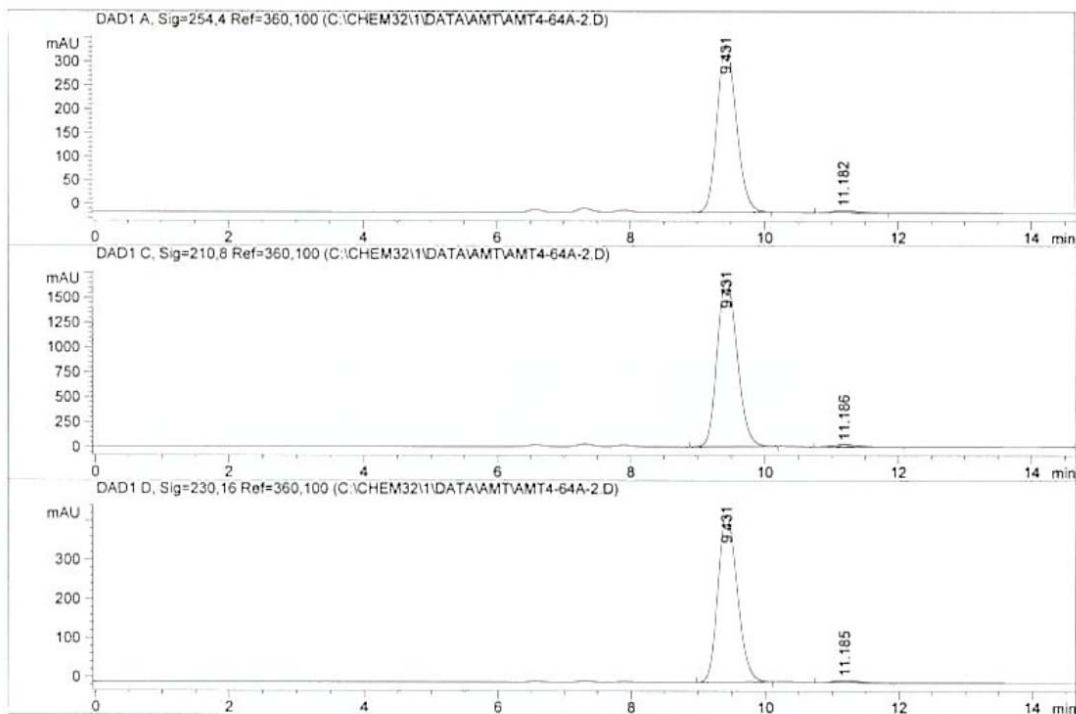

=====  
Area Percent Report  
=====

Sorted By : Signal  
Multiplier : 1.0000  
Dilution : 1.0000  
Sample Amount : 1.00000 [ng/ul] (not used in calc.)  
Use Multiplier & Dilution Factor with ISTDs

Data File C:\CHEM32\1\DATA\AMT\AMT4-64A-2.D  
Sample Name: AMT4-64A-2

Signal 1: DAD1 A, Sig=254,4 Ref=360,100

| Peak # | RetTime [min] | Type | Width [min] | Area [mAU*s] | Height [mAU] | Area %  |
|--------|---------------|------|-------------|--------------|--------------|---------|
| 1      | 9.431         | BB   | 0.3126      | 7102.49219   | 353.20538    | 98.4334 |
| 2      | 11.182        | BB   | 0.3935      | 113.03805    | 4.43260      | 1.5666  |

Totals : 7215.53024 357.63798

Signal 2: DAD1 C, Sig=210,8 Ref=360,100

| Peak # | RetTime [min] | Type | Width [min] | Area [mAU*s] | Height [mAU] | Area %  |
|--------|---------------|------|-------------|--------------|--------------|---------|
| 1      | 9.431         | BB   | 0.3226      | 3.47120e4    | 1683.12036   | 98.3534 |
| 2      | 11.186        | BB   | 0.4016      | 581.15155    | 22.63275     | 1.6466  |

Totals : 3.52932e4 1705.75311

Signal 3: DAD1 D, Sig=230,16 Ref=360,100

| Peak # | RetTime [min] | Type | Width [min] | Area [mAU*s] | Height [mAU] | Area %  |
|--------|---------------|------|-------------|--------------|--------------|---------|
| 1      | 9.431         | BB   | 0.3109      | 8578.76465   | 429.71759    | 98.4012 |
| 2      | 11.185        | BB   | 0.3977      | 139.38789    | 5.46328      | 1.5988  |

Totals : 8718.15254 435.18087

=====  
\*\*\* End of Report \*\*\*

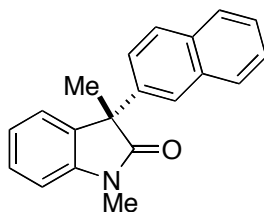

**1,3-dimethyl-3-(naphthalen-2-yl)indolin-2-one** (Table 1, entry 3) The reaction was conducted according to the general procedure to afford the title compound as a clear oil (117 mg, 81%). <sup>1</sup>H NMR (400 MHz, CDCl<sub>3</sub>) δ: 7.87 (m, 4H), 7.53 (m, 2H), 7.45 (dd, *J* = 2.0, 8.6 Hz, 1H), 7.42 (td, *J* = 1.2, 7.7, 7.7 Hz, 1H), 7.28 (d, *J* = 6.7 Hz, 1H), 7.19 (td, *J* = 0.8, 7.5, 7.5 Hz, 1H), 7.00 (d, *J* = 7.8 Hz, 1H), 3.32 (s, 3H), 1.97 (s, 3H) ppm. <sup>13</sup>C NMR (400 MHz, CDCl<sub>3</sub>) δ: 179.3, 143.1, 138.0, 134.7, 133.1, 132.3, 128.1, 127.9, 127.3, 126.0, 125.9, 125.2, 124.8, 124.1, 122.7, 108.3, 52.2, 26.4, 23.5 ppm. IR (neat, cm<sup>-1</sup>): 3055.0, 2969.7, 2932.3, 1714.1, 1506.5, 1493.2, 1470.6, 1419.0, 1373.5, 1343.1, 1302.6, 1259.5, 1157.9, 1144.3, 1128.4, 1114.2, 1100.5, 1053.2, 1024.1, 1053.2, 1024.1. Enantiomeric excess: 96%, Chiralpak AD-H column, 10% <sup>i</sup>PrOH, 90% hexanes; *t*<sub>minor</sub> = 16.561 min, *t*<sub>major</sub> = 11.831 min; [α]<sub>D</sub><sup>22</sup> -90.3 ° (c 0.558, CHCl<sub>3</sub>).

Data File C:\CHEM32\2\DATA\AMT\AMT4-41-3.D  
Sample Name: AMT4-41-3

=====

|                 |                                                          |            |          |
|-----------------|----------------------------------------------------------|------------|----------|
| Acq. Operator   | : AMT                                                    | Location   | : Vial 3 |
| Acq. Instrument | : Instrument 2                                           | Inj Volume | : 1 µl   |
| Injection Date  | : 4/7/2009 3:31:57 PM                                    |            |          |
| Acq. Method     | : C:\CHEM32\1\METHODS\AMTSTANDARD.M                      |            |          |
| Last changed    | : 4/7/2009 3:31:14 PM by AMT<br>(modified after loading) |            |          |
| Analysis Method | : C:\CHEM32\2\DATA\AMT\AMT4-41-3.D\DA.M (AMTSTANDARD.M)  |            |          |
| Last changed    | : 4/7/2009 4:11:13 PM by AMT                             |            |          |
| Sample Info     | : AD-H 10% IPA IN HEXANES 1.0 ML/MIN                     |            |          |

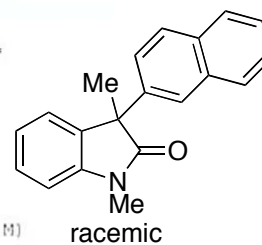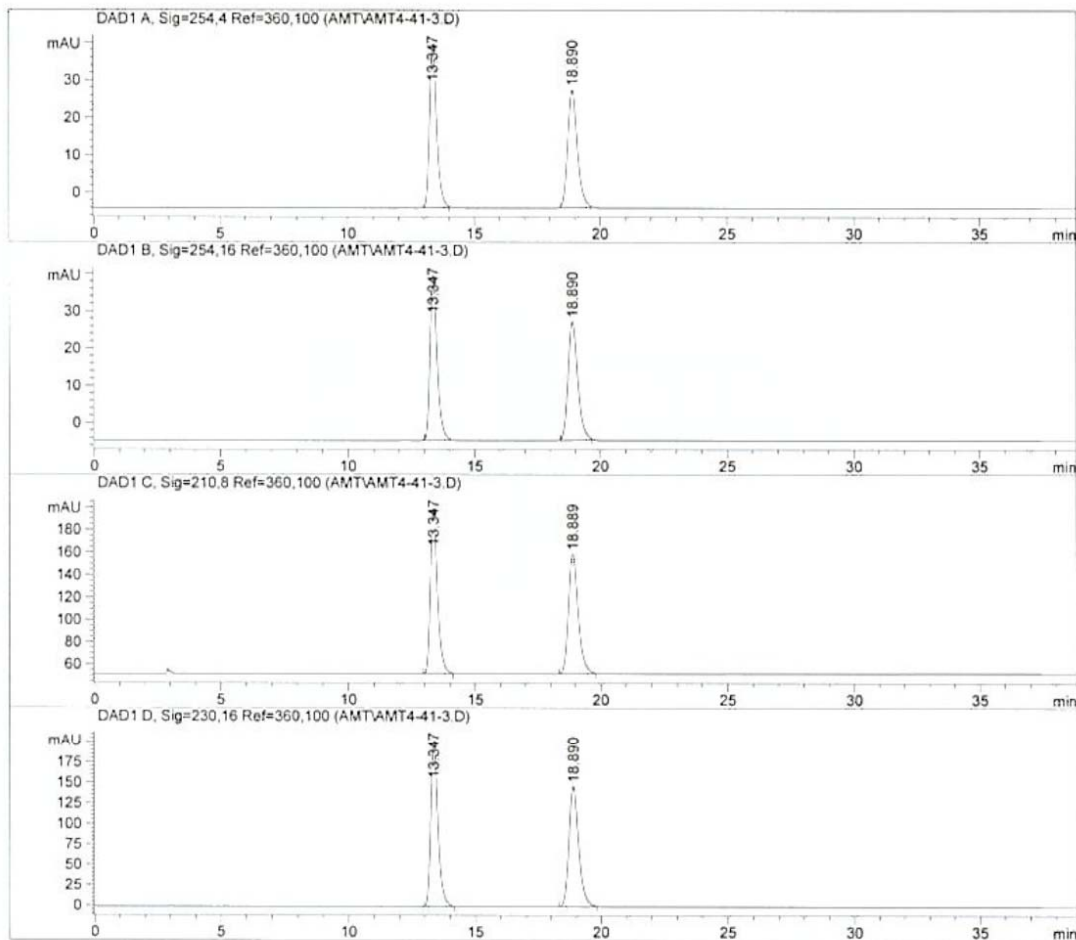



Data File C:\CHEM32\2\DATA\AMT\AMT4-41-3.D  
 Sample Name: AMT4-41-3

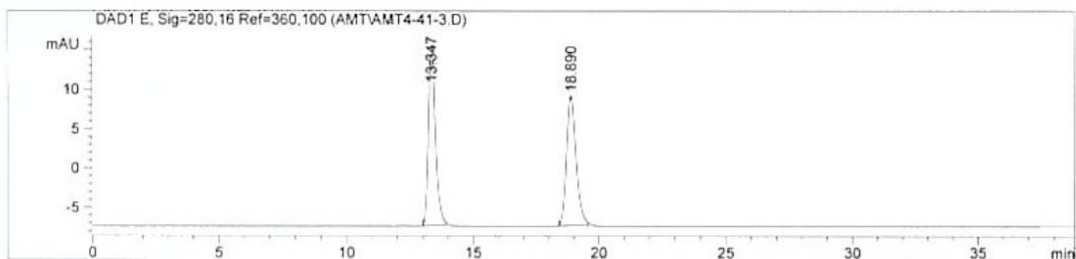

=====  
 Area Percent Report  
 =====

Sorted By : Signal  
 Multiplier : 1.0000  
 Dilution : 1.0000  
 Sample Amount : 1.00000 [ng/ul] (not used in calc.)  
 Use Multiplier & Dilution Factor with ISTDs

Signal 1: DAD1 A, Sig=254,4 Ref=360,100

| Peak #   | RetTime [min] | Type | Width [min] | Area [mAU*s] | Height [mAU] | Area %  |
|----------|---------------|------|-------------|--------------|--------------|---------|
| 1        | 13.347        | BB   | 0.2944      | 846.07355    | 43.60836     | 50.2405 |
| 2        | 18.890        | BB   | 0.4069      | 837.97266    | 31.44374     | 49.7595 |
| Totals : |               |      |             | 1684.04620   | 75.05210     |         |

Signal 2: DAD1 B, Sig=254,16 Ref=360,100

| Peak #   | RetTime [min] | Type | Width [min] | Area [mAU*s] | Height [mAU] | Area %  |
|----------|---------------|------|-------------|--------------|--------------|---------|
| 1        | 13.347        | BB   | 0.2946      | 856.91003    | 44.12596     | 50.2575 |
| 2        | 18.890        | BB   | 0.4070      | 848.12775    | 31.81866     | 49.7425 |
| Totals : |               |      |             | 1705.03778   | 75.94463     |         |

Signal 3: DAD1 C, Sig=210,8 Ref=360,100

| Peak #   | RetTime [min] | Type | Width [min] | Area [mAU*s] | Height [mAU] | Area %  |
|----------|---------------|------|-------------|--------------|--------------|---------|
| 1        | 13.347        | BB   | 0.2957      | 2887.28345   | 147.94829    | 50.0503 |
| 2        | 18.889        | BB   | 0.4104      | 2881.48096   | 106.91277    | 49.9497 |
| Totals : |               |      |             | 5768.76440   | 254.86106    |         |

Data File C:\CHEM32\2\DATA\AMT\AMT4-41-3.D  
Sample Name: AMT4-41-3

Signal 4: DAD1 D, Sig=230,16 Ref=360,100

| Peak # | RetTime [min] | Type | Width [min] | Area [mAU*s] | Height [mAU] | Area %  |
|--------|---------------|------|-------------|--------------|--------------|---------|
| 1      | 13.347        | BB   | 0.2963      | 3969.54932   | 202.79507    | 50.0531 |
| 2      | 18.890        | BB   | 0.4108      | 3960.12939   | 146.76143    | 49.9469 |

Totals :                    7928.67871   349.55650

Signal 5: DAD1 E, Sig=280,16 Ref=360,100

| Peak # | RetTime [min] | Type | Width [min] | Area [mAU*s] | Height [mAU] | Area %  |
|--------|---------------|------|-------------|--------------|--------------|---------|
| 1      | 13.347        | BB   | 0.2928      | 440.29120    | 22.84582     | 50.2520 |
| 2      | 18.890        | BB   | 0.4029      | 435.87531    | 16.46381     | 49.7480 |

Totals :                    876.16650   39.30963

=====  
\*\*\* End of Report \*\*\*



Data File C:\CHEM32\1\DATA\AMT\AMT4-64D.D  
Sample Name: AMT4-64D

Signal 1: DAD1 A, Sig=254,4 Ref=360,100

| Peak # | RetTime [min] | Type | Width [min] | Area [mAU*s] | Height [mAU] | Area %  |
|--------|---------------|------|-------------|--------------|--------------|---------|
| 1      | 13.885        | BB   | 0.3335      | 2.03936e4    | 931.11536    | 98.1642 |
| 2      | 20.129        | BB   | 0.4360      | 381.39459    | 13.32124     | 1.8358  |

Totals :                   2.07750e4   944.43660

Signal 2: DAD1 C, Sig=210,8 Ref=360,100

| Peak # | RetTime [min] | Type | Width [min] | Area [mAU*s] | Height [mAU] | Area %  |
|--------|---------------|------|-------------|--------------|--------------|---------|
| 1      | 13.885        | BB   | 0.3803      | 6.36561e4    | 2611.97803   | 97.9878 |
| 2      | 20.129        | BB   | 0.4366      | 1307.15881   | 45.30059     | 2.0122  |

Totals :                   6.49632e4   2657.27862

Signal 3: DAD1 D, Sig=230,16 Ref=360,100

| Peak # | RetTime [min] | Type | Width [min] | Area [mAU*s] | Height [mAU] | Area %  |
|--------|---------------|------|-------------|--------------|--------------|---------|
| 1      | 13.885        | BB   | 0.4431      | 7.08319e4    | 2573.75708   | 97.5325 |
| 2      | 20.127        | BB   | 0.4407      | 1791.97412   | 62.08633     | 2.4675  |

Totals :                   7.26238e4   2635.84341

=====  
\*\*\* End of Report \*\*\*

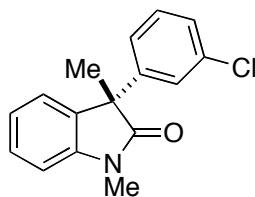

**3-(3-chlorophenyl)-1,3-dimethylindolin-2-one (3**, Table 1, entry 4) The reaction was conducted according to the general procedure for 18 h to afford the title compound as an off-white solid (86 mg, 63%). <sup>1</sup>H NMR (400 MHz, CDCl<sub>3</sub>) δ: 7.36 (td, *J* = 1.4, 7.7, 7.7 Hz, 1H), 7.29 (m, 1H), 7.22 (m, 3H), 7.19 (ddd, *J* = 0.5, 1.4, 7.4 Hz, 1H), 7.13 (td, *J* = 1.0, 7.4, 7.4 Hz, 1H), 6.94 (d, 7.8 Hz, 1H), 3.25 (s, 3H), 1.77 (s, 3H) ppm. <sup>13</sup>C NMR (400 MHz, CDCl<sub>3</sub>) δ: 178.7, 143.0, 142.7, 134.3, 133.9, 129.7, 128.3, 127.4, 126.9, 124.9, 124.0, 122.9, 108.4, 51.8, 26.4, 23.7 ppm. IR (neat, cm<sup>-1</sup>): 1715.6, 1611.9, 1593.7, 1569.8, 1492.7, 1471.1, 1418.0, 1374.3, 1345.3, 1303.6, 1256.7, 1144.8, 1102.9, 1024.2. Enantiomeric excess: 97%, Chiralpak AD-H column, 2% <sup>i</sup>PrOH, 98% hexanes; *t*<sub>minor</sub> = 15.2 min, *t*<sub>major</sub> = 12.8 min; [α]<sub>D</sub><sup>21</sup> -14.68 ° (c 0.066, CHCl<sub>3</sub>). Anal. Calc. for C<sub>16</sub>H<sub>14</sub>ClNO: C, 70.72; H, 5.19. Found: C, 70.85; H, 5.15. M. P.: 90 °C.

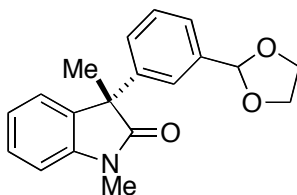

**3-[3-(1,3-dioxolan-2-yl)phenyl]-1,3-dimethylindolin-2-one** (Table 1, entry 5) The reaction was conducted according to the general procedure to afford the title compound as a clear oil (97 mg, 63%). <sup>1</sup>H NMR (400 MHz, CDCl<sub>3</sub>) δ: 7.43 (m, 1H), 7.38 (m, 1H), 7.31 (m, 3H), 7.20 (dd, *J* = 1.2, 7.4 Hz, 1H), 7.10 (dt, *J* = 0.9, 7.5, 7.5 Hz, 1H), 6.92 (d, *J* = 7.8 Hz, 1H), 5.76 (s, 1H), 4.08 (m, 4H), 3.23 (s, 3H), 1.79 (s, 3H) ppm. <sup>13</sup>C NMR (400 MHz, CDCl<sub>3</sub>) δ: 179.0, 143.0, 140.8, 138.0, 134.4, 128.5, 128.0, 127.5, 125.1, 124.7, 124.1, 122.6, 108.2, 103.5, 65.1, 65.0, 51.9, 26.3, 23.9 ppm. IR (neat, cm<sup>-1</sup>): 3054.8, 2970.1, 2887.3, 1715.2, 1611.8, 1492.2, 1471.1, 1420.1, 1374.0, 1345.8, 1304.0, 1255.4, 1221.3, 1174.1, 1143.9, 1102.9, 1083.6, 1024.7. Enantiomeric excess: 96%, Chiralpak AS-H column, 10% <sup>i</sup>PrOH, 90% hexanes; *t*<sub>minor</sub> = 17.339 min, *t*<sub>major</sub> = 15.328 min; [α]<sub>D</sub><sup>22</sup> -11.65 ° (c 0.086, CHCl<sub>3</sub>).

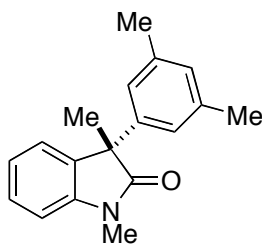

**3-(3,5-dimethylphenyl)-1,3-dimethylindolin-2-one** (Table 1, entry 6) The reaction was conducted according to the general procedure to afford the title compound as an off-white solid (106 mg, 80%). <sup>1</sup>H NMR (400 MHz, CDCl<sub>3</sub>) δ: 7.34 (dt, *J* = 1.3, 7.7, 7.7 Hz, 1H), 7.22 (m, 1H), 7.14 (m, 1H), 6.94 (m, 4H), 3.28 (s, 3H), 2.30 (s, 6H), 1.80 (s, 3H) ppm. <sup>13</sup>C NMR (400 MHz, CDCl<sub>3</sub>) δ: 179.5, 143.0, 140.5, 137.8, 135.1, 128.9, 127.8, 124.2, 124.0, 122.6, 108.1, 51.9, 26.3, 23.5, 21.3 ppm. IR (neat, cm<sup>-1</sup>): 1716.6, 1611.5, 1492.7, 1470.6, 1372.8, 1342.7, 1303.3, 1256.4, 1102.2, 1026.4. Enantiomeric excess: 96%, Chiralpak AD-H column, 10% <sup>i</sup>PrOH, 90% hexanes; *t*<sub>minor</sub> = 5.240 min, *t*<sub>major</sub> = 4.338 min; [α]<sub>D</sub><sup>22</sup> -112.7 ° (c 0.582, CHCl<sub>3</sub>). Anal. Calc. for C<sub>18</sub>H<sub>19</sub>NO: C, 81.47; H, 7.22. Found: C, 81.47; H, 7.31. M. P.: 86 °C.

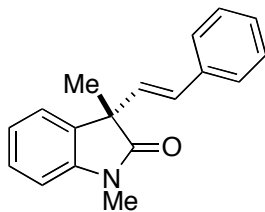

**(E)-1,3-dimethyl-3-styrylindolin-2-one** (Table 1, entry 7 *trans*) The reaction was conducted according to the general procedure at room temperature for 24 h. The title compound was isolated as a white foam (98 mg, 74%). <sup>1</sup>H NMR (500 MHz, CDCl<sub>3</sub>) δ: 7.36 (m, 3H), 7.31 (m, 3H), 7.23 (tt, *J* = 1, 1, 6.5, 6.5 Hz, 1H), 7.17 (td, *J* = 1, 8, 8 Hz, 1H), 3.25 (s, 3H), 1.62 (s, 3H) ppm. <sup>13</sup>C NMR (500 MHz, CDCl<sub>3</sub>) δ: 178.6, 142.9, 136.4, 132.8, 129.9, 129.8, 128.4, 128.1, 127.6, 126.4, 123.9, 122.5, 108.3, 50.6, 26.3, 23.0 ppm. IR (neat, cm<sup>-1</sup>): 1714.5, 1611.7, 1492.7, 1490.3, 1447.4, 1419.1, 1373.7, 1348.2, 1254.5. Enantiomeric excess: 77%, Chiralpak AD-H column, 5% <sup>i</sup>PrOH, 95% hexanes; *t*<sub>minor</sub> = 12.100 min, *t*<sub>major</sub> = 19.285 min; [α]<sub>D</sub><sup>22</sup> -91.78 ° (c 1.428, CHCl<sub>3</sub>). Anal. Calc. for C<sub>18</sub>H<sub>17</sub>NO: C, 82.10; H, 6.51. Found: C, 82.06; H, 6.51.

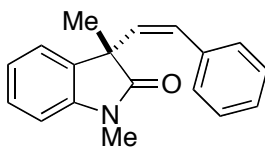

**(Z)-1,3-dimethyl-3-styrylindolin-2-one** (Table 1, entry 7 *cis*) The title compound was isolated as a clear oil (14 mg, 11%). <sup>1</sup>H NMR (500 MHz, CDCl<sub>3</sub>) δ: 7.12 (tt, *J* = 0.5, 0.5, 7.5, 7.5 Hz, 1H), 7.13 (dt, *J* = 0.5, 0.5, 7 Hz, 1H), 7.03 (m, 3H), 6.49 (d, *J* = 11.5 Hz, 1H), 6.58 (m, 2H), 5.95 (dd, *J* = 0.5, 11.5 Hz, 1H), 2.81 (d, *J* = 1 Hz, 3H), 1.15 (d, *J* = 0.5 Hz, 3H) ppm. IR (neat, cm<sup>-1</sup>): 1715.5, 1611.3, 1492.3, 1469.8, 1372.0, 1343.9, 1252.0, 1122.6, 1028.4. Enantiomeric excess: 98% (determined from reduced compound, *vide infra*); [α]<sub>D</sub><sup>22</sup> -159 ° (c 0.28, CHCl<sub>3</sub>). <sup>13</sup>C NMR (500 MHz, CDCl<sub>3</sub>) δ: 179.0, 142.5, 136.6, 136.0, 133.2, 133.0, 127.9, 127.6, 127.2, 126.5, 123.0, 122.4, 107.9, 48.7, 26.6, 25.9 ppm.

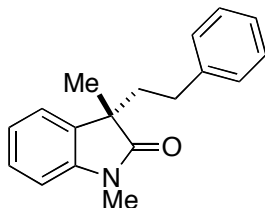

**1,3-dimethyl-3-phenethylindolin-2-one** (Table 1, entry 7 *cis* reduced) A round-bottomed flask was charged with (Z)-1,3-dimethyl-3-styrylindolin-2-one (6.1 mg, 0.023 mmol, 1 equiv), a stirbar, and a small amount of Pd/C before being sealed with a rubber septum. EtOH/ EtOAc (1:1, 4 mL) was added, and the vessel was evacuated and backfilled with H<sub>2</sub> three times. The reaction was stirred vigorously at rt for 2 h before the mixture was filtered through a plug of silica gel and eluted with EtOAc. The filtrate was concentrated *in vacuo* and purified by column chromatography with a Biotage (hexanes/ EtOAc) to yield the title compound as a clear oil (6 mg, 98%). <sup>1</sup>H NMR (400 MHz, CDCl<sub>3</sub>) δ: 7.32 (td, *J* = 1.3, 7.7, 7.7 Hz, 1H), 7.21 (m, 3H), 7.11 (m, 2H), 7.03 (m, 2H), 6.88 (d, *J* = 7.8 Hz, 1H), 3.21 (s, 3H), 2.29 (m, 2H), 2.16 (dd, *J* = 2.2, 11.8 Hz, 1H), 2.01 (m, 1H), 1.39 (s, 3H) ppm. <sup>13</sup>C NMR (400 MHz, CDCl<sub>3</sub>) δ: 180.3, 143.4, 141.4, 133.8, 128.3, 128.2, 127.8, 125.8, 122.6, 122.5, 108.0, 48.4, 40.2, 31.0, 26.1, 23.9 ppm. IR (neat, cm<sup>-1</sup>): 1711.6, 1612.8, 1383.7. Enantiomeric excess: 98%, Chiralcel OD-H column, 10% <sup>i</sup>PrOH, 90% hexanes; *t*<sub>minor</sub> = 6.11 min, *t*<sub>major</sub> = 7.44 min; [α]<sub>D</sub><sup>22</sup> 0.34 ° (c 0.092, CHCl<sub>3</sub>).

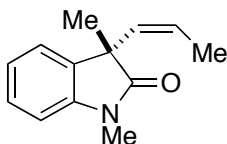

**(Z)-1,3-dimethyl-3-(prop-1-enyl)indolin-2-one** (Table 1, entry 8) The reaction was conducted according to the general procedure at room temperature for 24 h. The title compound was isolated as a clear oil (81 mg, 81%). <sup>1</sup>H NMR (500 MHz, CDCl<sub>3</sub>) δ: 7.26 (td, *J* = 1.5, 8, 8 Hz, 1H), 7.16 (dd, *J* = 1.5, 7.5 Hz, 1H), 7.05 (td, *J* = 1, 7.5, 7.5

Hz, 1H), 6.85 (d,  $J = 7.5$  Hz, 1H), 5.62 (dq,  $J = 1.5, 3, 11$  Hz, 1H), 5.56 (m, 1H), 3.23 (s, 3H), 1.50 (s, 3H), 1.07 (dd,  $J = 1.5, 7$  Hz, 3H) ppm.  $^{13}\text{C}$  NMR (500 MHz,  $\text{CDCl}_3$ )  $\delta$ : 179.7, 142.5, 135.4, 131.2, 128.6, 127.5, 122.9, 122.7, 107.9, 48.5, 26.4, 26.2, 13.3 ppm. IR (neat,  $\text{cm}^{-1}$ ): 3019.7, 2969.5, 2926.4, 1717.1, 1611.2, 1492.1, 1470.6, 1451.6, 1420.9, 1400.9, 1372.2, 1343.1, 1303.1, 1252.7, 1158.0, 1124.8, 1053.8, 1024.9. Enantiomeric excess: 94%, Whelk-O1 column, 5%  $^i\text{PrOH}$ , 95% hexanes;  $t_{\text{minor}} = 10.593$  min,  $t_{\text{major}} = 11.827$  min;  $[\alpha]_{\text{D}}^{22} -44.98^\circ$  (c 1.04,  $\text{CHCl}_3$ ). Anal. Calc. for  $\text{C}_{13}\text{H}_{15}\text{NO}$ : C, 77.58; H, 7.51. Found: C, 77.30; H, 7.61.

Data File C:\CHEM32\1\DATA\AMT\AMT4-51-1.D  
 Sample Name: AMT4-51-1

```

=====
Acq. Operator   : AMT
Acq. Instrument : Instrument 1
Injection Date  : 4/15/2009 11:12:06 AM
Location        : Vial 1
Inj Volume     : 1  $\mu\text{l}$ 

Acq. Method    : C:\CHEM32\1\METHODS\AMH.M
Last changed   : 4/15/2009 11:11:46 AM by AMT
                (modified after loading)
Analysis Method : C:\CHEM32\1\DATA\AMT\AMT4-51-1.D\DA.M (AMH.M)
Last changed   : 4/15/2009 11:39:20 AM by AMT
Sample Info    : WHELK, 5% IPA in HEXANE, 1.0 ML/MIN
  
```

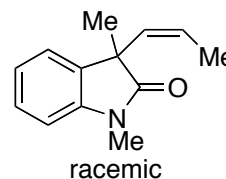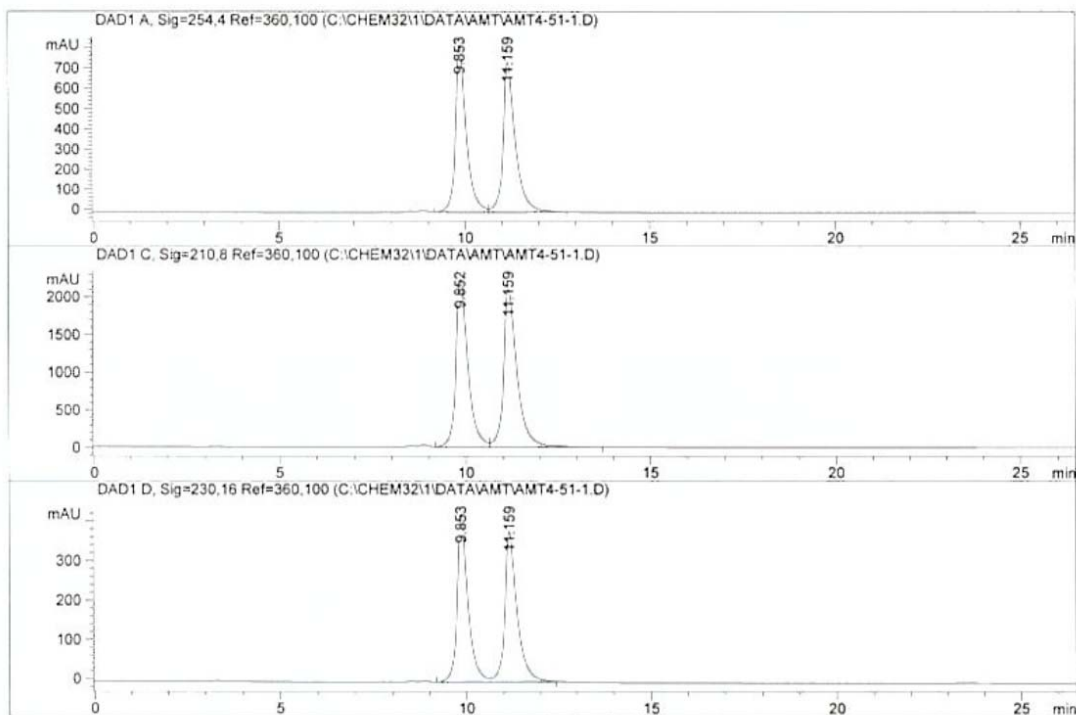

=====  
 Area Percent Report  
 =====

```

Sorted By      : Signal
Multiplier     : 1.0000
Dilution       : 1.0000
Sample Amount  : 1.00000 [ng/ul] (not used in calc.)
Use Multiplier & Dilution Factor with ISTDs
  
```

Data File C:\CHEM32\1\DATA\AMT\AMT4-51-1.D  
Sample Name: AMT4-51-1

Signal 1: DAD1 A, Sig=254,4 Ref=360,100

| Peak # | RetTime [min] | Type | Width [min] | Area [mAU*s] | Height [mAU] | Area %  |
|--------|---------------|------|-------------|--------------|--------------|---------|
| 1      | 9.853         | VV   | 0.2969      | 1.69955e4    | 829.83063    | 49.4578 |
| 2      | 11.159        | VB   | 0.3371      | 1.73681e4    | 741.84705    | 50.5422 |

Totals :                   3.43637e4 1571.67767

Signal 2: DAD1 C, Sig=210,8 Ref=360,100

| Peak # | RetTime [min] | Type | Width [min] | Area [mAU*s] | Height [mAU] | Area %  |
|--------|---------------|------|-------------|--------------|--------------|---------|
| 1      | 9.852         | VV   | 0.3399      | 5.12177e4    | 2230.54956   | 48.6064 |
| 2      | 11.159        | VB   | 0.3773      | 5.41548e4    | 2097.07861   | 51.3936 |

Totals :                   1.05373e5 4327.62817

Signal 3: DAD1 D, Sig=230,16 Ref=360,100

| Peak # | RetTime [min] | Type | Width [min] | Area [mAU*s] | Height [mAU] | Area %  |
|--------|---------------|------|-------------|--------------|--------------|---------|
| 1      | 9.853         | VV   | 0.2965      | 8723.73730   | 426.65952    | 49.6775 |
| 2      | 11.159        | VB   | 0.3347      | 8836.99316   | 380.91174    | 50.3225 |

Totals :                   1.75607e4 807.57126

=====  
\*\*\* End of Report \*\*\*





Data File C:\CHEM32\1\DATA\AMT\AMT4-69B.D  
Sample Name: AMT4-69B

Signal 1: DAD1 A, Sig=254,4 Ref=360,100

| Peak # | RetTime [min] | Type | Width [min] | Area [mAU*s] | Height [mAU] | Area %  |
|--------|---------------|------|-------------|--------------|--------------|---------|
| 1      | 10.593        | BB   | 0.3052      | 384.30042    | 18.74267     | 3.0553  |
| 2      | 11.827        | BB   | 0.3540      | 1.21940e4    | 493.94867    | 96.9447 |

Totals :                    1.25783e4   512.69134

Signal 2: DAD1 C, Sig=210,8 Ref=360,100

| Peak # | RetTime [min] | Type | Width [min] | Area [mAU*s] | Height [mAU] | Area %  |
|--------|---------------|------|-------------|--------------|--------------|---------|
| 1      | 10.593        | BV   | 0.3216      | 1380.08276   | 62.99067     | 3.3643  |
| 2      | 11.827        | VB   | 0.3725      | 3.96410e4    | 1539.27563   | 96.6357 |

Totals :                    4.10211e4   1602.26630

Signal 3: DAD1 D, Sig=230,16 Ref=360,100

| Peak # | RetTime [min] | Type | Width [min] | Area [mAU*s] | Height [mAU] | Area %  |
|--------|---------------|------|-------------|--------------|--------------|---------|
| 1      | 10.593        | BB   | 0.3003      | 192.49416    | 9.58444      | 3.0021  |
| 2      | 11.827        | BB   | 0.3523      | 6219.52051   | 253.46826    | 96.9979 |

Totals :                    6412.01466   263.05270

\*\*\*\*\*  
\*\*\* End of Report \*\*\*

Instrument 1 6/17/2009 7:35:45 PM jACLYN

Page 2 of 2

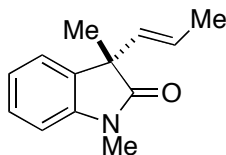

**(E)-1,3-dimethyl-3-(prop-1-enyl)indolin-2-one** (Table 1, entry 9) The reaction was conducted according to the general procedure at room temperature for 24 h. The title compound was isolated as a clear oil (90 mg, 89%). <sup>1</sup>H

NMR (500 MHz, CDCl<sub>3</sub>)  $\delta$ : 7.28 (tt,  $J = 1, 1, 7.5, 7.5$  Hz, 1H), 7.18 (dt,  $J = 0.5, 0.5, 7.5$  Hz, 1H), 7.08 (tt,  $J = 1, 1, 8, 8$  Hz, 1H), 6.85 (dd,  $J = 0.5, 7.5$  Hz, 1H), 5.60 (dq,  $J = 1.5, 2.5, 15.5$  Hz, 1H), 5.54 (m, 1H), 3.19 (d,  $J = 1$  Hz, 3H), 1.65 (dd,  $J = 1, 6$  Hz, 3H), 1.45 (d,  $J = 0.5$  Hz, 3H) ppm. <sup>13</sup>C NMR (500 MHz, CDCl<sub>3</sub>)  $\delta$ : 179.1, 142.8, 133.4, 130.9, 127.7, 125.9, 123.6, 122.3, 108.0, 50.3, 26.1, 22.8, 17.8 ppm. IR (neat, cm<sup>-1</sup>): 2967.2, 2927.0, 1718.8, 1611.7, 1493.2, 1471.0, 1450.0, 1420.0, 1373.8, 1345.6, 1306.0, 1256.2, 1158.8, 1119.7, 1084.8, 1055.0, 1024.5. Enantiomeric excess: 54%, Whelk-O1 column, 5% <sup>1</sup>PrOH, 95% hexanes;  $t_{\text{minor}} = 9.863$  min,  $t_{\text{major}} = 12.001$  min;  $[\alpha]_{\text{D}}^{22} -0.46^\circ$  (c 0.25, CHCl<sub>3</sub>). Anal. Calc. for C<sub>13</sub>H<sub>15</sub>NO: C, 77.58; H, 7.51. Found: C, 77.29; H, 7.59.

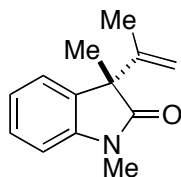

**1,3-dimethyl-3-(prop-1-en-2-yl)indolin-2-one (4, Table 1, entry 10)** The reaction was conducted according to the general procedure at 50 °C for 24 h. The title compound was isolated as a white crystalline solid (64 mg, 64%). <sup>1</sup>H NMR (500 MHz, CDCl<sub>3</sub>)  $\delta$ : 7.23 (td,  $J = 1.5, 7.5, 7.5$  Hz, 1H), 7.09 (ddd,  $J = 0.5, 1.5, 7.5$  Hz, 1H), 7.05 (dt,  $J = 1, 1, 8.5$  Hz, 1H), 6.85 (d,  $J = 8$  Hz, 1H), 5.09 (d,  $J = 1$  Hz, 1H), 5.03 (p,  $J = 1.5, 1.5, 2.5$  Hz, 1H), 3.22 (s, 3H), 1.48 (m, 6H) ppm. <sup>13</sup>C NMR (500 MHz, CDCl<sub>3</sub>)  $\delta$ : 179.0, 143.5, 143.3, 133.7, 127.9, 123.0, 122.6, 112.9, 108.0, 53.8, 26.3, 21.3, 19.4 ppm. IR (neat, cm<sup>-1</sup>): 2979.0, 2935.7, 2880.2, 1720.4, 1645.4, 1610.9, 1493.1, 1474.0, 1445.2, 1418.4, 1373.0, 1345.0, 1300.9, 1258.7, 1228.5, 1118.4, 1102.9, 1060.2, 1032.9, 1001.9. Enantiomeric excess: (determined from reduced compound, *vide infra*);  $[\alpha]_{\text{D}}^{21} +28.4$  (c 0.38, CHCl<sub>3</sub>). Anal. Calc. for C<sub>13</sub>H<sub>15</sub>NO: C, 77.58; H, 7.51. Found: C, 77.42; H, 7.59. M. P.: 60 °C.

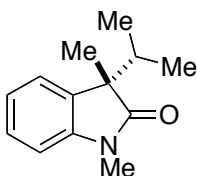

**3-isopropyl-1,3-dimethylindolin-2-one (5, Scheme 1)** A round bottomed flask was charged with 1,3-dimethyl-3-(prop-1-en-2-yl)indolin-2-one (**2**, 28 mg, 0.138 mmol), Pd/C (small spatula tip, ~10 mg), and a stirbar. EtOH/EtOAc (1:1, 4 mL) was added, and the mixture was evacuated and purged with H<sub>2</sub> three times before the mixture was stirred at room temperature for 2 h. The mixture was filtered through a plug of silica gel, concentrated, and purified with a Biotage on silica gel with hexanes and ethyl acetate to yield the title compound was isolated as a white solid (25 mg, 89%). <sup>1</sup>H NMR (400 MHz, CDCl<sub>3</sub>)  $\delta$ : 7.28 (td,  $J = 1.3, 7.7, 7.7$  Hz, 1H), 7.20 (dd,  $J = 0.5, 7.6, 7.6$  Hz, 1H), 6.83 (d,  $J = 7.7$  Hz, 1H), 3.20 (s, 3H), 2.18 (sept,  $J = 6.9, 6.9, 13.8, 13.8$  Hz, 1H), 1.36 (s, 3H), 0.99 (d,  $J = 7.0$  Hz, 3H), 0.71 (d,  $J = 6.8$  Hz, 3H) ppm. <sup>13</sup>C NMR (400 MHz, CDCl<sub>3</sub>)  $\delta$ : 180.9, 143.5, 133.0, 127.5, 123.4, 122.1, 107.7, 51.5, 35.4, 25.9, 21.4, 17.4, 17.1 ppm. IR (neat, cm<sup>-1</sup>): 2964.4, 1708.3, 1611.8, 1493.1, 1469.3, 1376.0, 1348.8, 1300.9, 1259.9, 1125.1, 1074.4, 1020.8. Enantiomeric excess: 96%, Chiralcel OC column, 2% <sup>1</sup>PrOH, 98% hexanes;  $t_{\text{minor}} = 25.17$  min,  $t_{\text{major}} = 22.64$  min;  $[\alpha]_{\text{D}}^{21} +53.94^\circ$  (c = 0.404, CHCl<sub>3</sub>). M. P.: 54 °C.

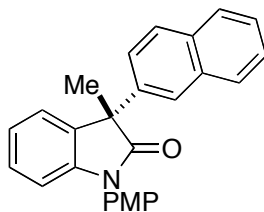

**1-(4-methoxyphenyl)-3-methyl-3-(naphthalen-2-yl)indolin-2-one (Figure 2)** The reaction was conducted according to the general procedure at 50 °C for 24 h. The title compound was isolated as a white solid (139 mg, 73%). <sup>1</sup>H NMR (400 MHz, CDCl<sub>3</sub>)  $\delta$ : 7.95 (d,  $J = 1.6$  Hz, 1H), 7.85, (m, 3H), 7.55 (m, 3H), 7.44 (dt,  $J = 3.3, 3.3, 10.1$  Hz, 2H), 7.31 (m, 2H), 7.19 (td,  $J = 0.7, 7.5, 7.5$  Hz, 1H), 7.10 (dt,  $J = 3.3, 3.3, 10.1$  Hz, 2H), 6.97 (m, 1H), 3.89 (s, 3H), 2.07 (s, 3H) ppm. <sup>13</sup>C NMR (400 MHz, CDCl<sub>3</sub>)  $\delta$ : 178.8, 159.0, 143.5, 138.2, 134.5, 133.1, 132.4, 128.3, 18.0, 127.9, 127.3, 127.0, 126.0, 125.9, 125.3, 124.8, 124.4, 123.1, 114.7, 109.5, 55.4, 52.2, 23.7 ppm. IR

(neat,  $\text{cm}^{-1}$ ): 3054.7, 2969.4, 2933.5, 2837.4, 22467.0, 2047.0, 1719.8, 1632.2, 1586.7, 1513.9, 1483.4, 1463.8, 1375.5, 1324.8, 1298.9, 1249.5, 1210.3, 1180.8, 1167.0, 1129.0, 1106.7, 1059.7, 1031.6. Enantiomeric excess: >99%, Chiralpak AD-H column, 30%  $i$ PrOH, 70% hexanes;  $t_{\text{minor}} = 49.348$  min,  $t_{\text{major}} = 14.142$  min;  $[\alpha]_{\text{D}}^{21} +29.8^\circ$  ( $c = 2.56$ ,  $\text{CHCl}_3$ ). Anal. Calc. for  $\text{C}_{26}\text{H}_{21}\text{NO}_2$ : C, 82.30; H, 5.58. Found: C, 82.30; H, 5.64. M. P.:  $144^\circ\text{C}$ .

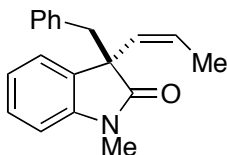

**(Z)-3-benzyl-1-methyl-3-(prop-1-enyl)indolin-2-one** (Figure 2) The reaction was conducted according to the general procedure at  $50^\circ\text{C}$  for 24 h. The title compound was isolated as a yellow solid (104 mg, 75%).  $^1\text{H}$  NMR (400 MHz,  $\text{CDCl}_3$ )  $\delta$ : 7.15 (m, 2H), 7.01 (m, 4H), 6.78 (m, 2H), 6.53 (m, 1H), 5.80 (dq,  $J = 1.6, 3.3, 10.9$  Hz, 1H), 5.65 (m, 1H), 3.33 (d,  $J = 12.6$  Hz, 2H), 3.18 (d,  $J = 12.6$  Hz, 1H), 2.90 (s, 3H), 1.09 (dd,  $J = 1.7, 7.04$  Hz, 3H) ppm.  $^{13}\text{C}$  NMR (400 MHz,  $\text{CDCl}_3$ )  $\delta$ : 178.0, 143.1, 134.8, 132.5, 130.1, 129.8, 129.2, 127.6, 127.1, 126.4, 123.8, 122.2, 107.5, 54.4, 45.8, 25.7, 13.9 ppm. IR (neat,  $\text{cm}^{-1}$ ): 3028.5, 1712.2, 1610.3, 1492.5, 1469.8, 1373.1, 1350.1, 1254.1, 1118.4, 1088.1, 1021.4. Enantiomeric excess: 86%, Chiralpak AD-H column, 2%  $i$ PrOH, 1.0 mL/ min, 98% hexanes;  $t_{\text{minor}} = 14.64$  min,  $t_{\text{major}} = 12.71$  min;  $[\alpha]_{\text{D}}^{22} +3.48^\circ$  ( $c = 0.168$ ,  $\text{CHCl}_3$ ). M. P.:  $74^\circ\text{C}$ .

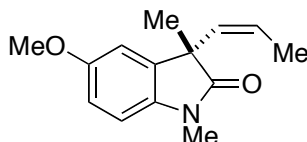

**(Z)-5-methoxy-1,3-dimethyl-3-(prop-1-enyl)indolin-2-one** (Figure 2) The reaction was conducted according to the general procedure at  $50^\circ\text{C}$  for 24 h. The title compound was isolated as a clear oil (91 mg, 79%).  $^1\text{H}$  NMR (400 MHz,  $\text{CDCl}_3$ )  $\delta$ : 6.74 (m, 3H), 5.55 (m, 2H), 3.75 (s, 3H), 3.19 (s, 3H), 1.46 (s, 3H), 1.07 (dt,  $J = 1.3, 1.3, 6.7$  Hz, 3H) ppm.  $^{13}\text{C}$  NMR (400 MHz,  $\text{CDCl}_3$ )  $\delta$ : 179.4, 156.1, 136.8, 136.0, 131.1, 128.8, 111.6, 110.3, 108.1, 55.6, 48.9, 26.5, 26.2, 13.3 ppm. IR (neat,  $\text{cm}^{-1}$ ): 3018.5, 2967.6, 2834.6, 1710.7, 1600.3, 1494.9, 1469.3, 1434.5, 1401.1, 1348.3, 1287.4, 1234.1, 1206.2, 1179.8, 1156.1, 1117.7, 1035.5. Enantiomeric excess: 71%, Chiralpak AS-H column, 2%  $i$ PrOH, 90% hexanes;  $t_{\text{minor}} = 18.10$  min,  $t_{\text{major}} = 20.50$  min;  $[\alpha]_{\text{D}}^{22} -70.73^\circ$  ( $c = 1.186$ ,  $\text{CHCl}_3$ ).

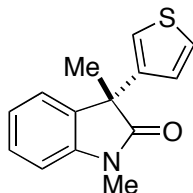

**1,3-dimethyl-3-(thiophen-3-yl)indolin-2-one** (Figure 2) The reaction was conducted according to the general procedure at  $50^\circ\text{C}$  for 24 h. The title compound was isolated as a clear oil (50 mg, 41%).  $^1\text{H}$  NMR (400 MHz,  $\text{CDCl}_3$ )  $\delta$ : 7.35 (dd,  $J = 1.1, 7.6$  Hz, 1H), 7.30 (m, 1H), 7.27 (dd,  $J = 3.2, 5.0$ ), 7.14 (td,  $J = 0.7, 7.4, 7.4$  Hz, 1H), 7.07 (m, 2H), 6.92 (d,  $J = 7.8$  Hz, 1H), 3.23 (s, 3H), 1.76 (s, 3) ppm.  $^{13}\text{C}$  NMR (400 MHz,  $\text{CDCl}_3$ )  $\delta$ : 178.6, 142.9, 141.5, 134.1, 128.2, 126.4, 126.0, 123.8, 122.7, 121.4, 108.3, 49.9, 26.4, 24.4 ppm. IR (neat,  $\text{cm}^{-1}$ ): 3105.1, 3054.3, 2970.3, 2929.7, 1715.8, 1612.0, 1493.4, 1470.9, 1451.9, 1419.5, 1373.5, 1346.5, 1303.2, 1246.2, 1203.5, 1157.8, 1143.7, 1114.2, 1057.5, 1024.5. Enantiomeric excess: 95%, Chiralpak AD-H column, 10%  $i$ PrOH, 90% hexanes;  $t_{\text{minor}} = 6.80$  min,  $t_{\text{major}} = 7.96$  min;  $[\alpha]_{\text{D}}^{22} -164.0^\circ$  ( $c = 0.56$ ,  $\text{CHCl}_3$ ).

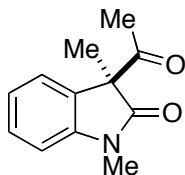

**3-acetyl-1,3-dimethylindolin-2-one** (6, Scheme 1) A round bottomed flask was charged with 1,3-dimethyl-3-(prop-1-en-2-yl)indolin-2-one (2, 18 mg, 0.089 mmol, 1 equiv) and a stirbar. Methylene chloride (10 mL) was added, and

the reaction was cooled to -78 °C. A Welsbach ozonator was used to generate ozone at a rate of about 0.9 mmol/min, and O<sub>3</sub> was bubbled through the solution until a blue color persisted. Argon was then bubbled through the solution until the blue color disappeared. PPh<sub>3</sub> (47 mg, 0.18 mmol, 2 equiv) was added, and the solution was warmed to room temperature and stirred for 2 h before being concentrated. Silica gel chromatography with a Biotage yielded the title compound as a white film (12 mg, 67%). <sup>1</sup>H NMR (400 MHz, CDCl<sub>3</sub>) δ: 7.37 (td, *J* = 1.4, 7.8, 7.8 Hz, 1H), 7.16 (ddd, *J* = 0.6, 1.4, 7.4 Hz, 1H), 7.11 (td, *J* = 1.0, 7.4, 7.4 Hz, 1H), 6.93 (d, *J* = 7.8 Hz, 1H), 3.30 (s, 3H), 1.96 (s, 3H), 1.57 (s, 3H) ppm. <sup>13</sup>C NMR (400 MHz, CDCl<sub>3</sub>) δ: 201.0, 175.9, 143.7, 129.4, 129.1, 123.5, 123.2, 108.6, 62.0, 26.6, 25.9, 18.9 ppm. IR (neat, cm<sup>-1</sup>): 1725.5, 1704.9, 1609.4, 1492.6, 1470.5, 1373.8, 1345.8, 1196.5, 1103.7, 1029.7. Enantiomeric excess: 96%, Chiralcel OC column, 2% <sup>i</sup>PrOH, 98% hexanes; *t*<sub>minor</sub> = 62.30 min, *t*<sub>major</sub> = 53.69 min; [α]<sub>D</sub><sup>22</sup> +211.13 ° (c = 0.124, CHCl<sub>3</sub>).

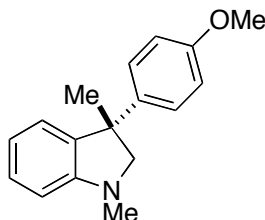

**3-(4-methoxyphenyl)-1,3-dimethylindoline (7, Scheme 1)** A round-bottomed flask was charged with **2** (43 mg, 0.161 mmol, 1 equiv) and a stirbar before being evacuated and purged with argon three times. Et<sub>2</sub>O (0.8 mL, [**2**] = 0.1 M) was added, and the solution was cooled to 0 °C before the addition of a solution of LiAlH<sub>4</sub> (1.0 M in Et<sub>2</sub>O, 800 μL, 0.805 mmol, 5 equiv). The solution was stirred at 0 °C for five minutes before being warmed to room temperature and stirred for 2 h. The reaction was quenched with H<sub>2</sub>O, extracted with EtOAc, dried with magnesium sulfate, and concentrated *in vacuo*. Silica gel chromatography with a Biotage yielded the title compound as a red oil (25 mg, 61%). <sup>1</sup>H NMR (500 MHz, CDCl<sub>3</sub>) δ: 7.28 (m, 2H), 7.21 (td, *J* = 1.5, 7.5, 7.5 Hz, 1H), 7.00 (ddd, *J* = 0.5, 1, 7 Hz, 1H), 6.87 (m, 2H), 6.78 (td, *J* = 1, 7.5, 7.5 Hz, 1H), 6.62 (d, *J* = 8 Hz, 1H), 3.81 (s, 3H), 3.52 (d, *J* = 9 Hz, 1H), 3.33 (d, *J* = 9 Hz, 1H), 2.81 (s, 3H), 1.72 (s, 3H) ppm. <sup>13</sup>C NMR (400 MHz, CDCl<sub>3</sub>) δ: 157.8, 152.5, 139.6, 137.9, 127.8, 127.6, 123.6, 118.1, 113.4, 107.7, 72.2, 55.2, 47.6, 36.0, 26.3 ppm. IR (neat, cm<sup>-1</sup>): 3045.4, 2960.0, 2853.8, 2833.9, 2806.4, 1605.5, 1580.4, 1510.7, 1489.6, 1462.5, 1422.3, 1378.1, 1324.3, 1296.3, 1249.2, 1182.4, 1156.1, 1115.7, 1097.7, 1083.8, 1034.5, 1021.7. Enantiomeric excess: 96%, OJ column, 0.5% <sup>i</sup>PrOH, 99.5% hexanes; *t*<sub>minor</sub> = 75.48 min, *t*<sub>major</sub> = 51.62 min; [α]<sub>D</sub><sup>22</sup> -27.42 ° (c = 0.5, CHCl<sub>3</sub>).

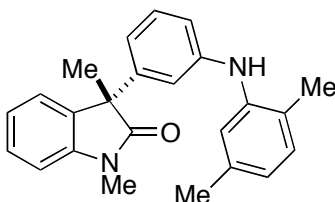

**3-(3-(2,5-dimethylphenylamino)phenyl)-1,3-dimethylindolin-2-one (8, Scheme 1)** For more details about the method that was used, see the recent publication regarding BrettPhos.<sup>8</sup> A round-bottomed flask was charged with 3-(3-chlorophenyl)-1,3-dimethylindolin-2-one (35.7 mg, 0.13 mmol, 1 equiv) before being evacuated and purged with Argon three times. 2,5-dimethylaniline (20 μL, 0.158 mmol, 1.2 equiv) was added, followed by dibutyl ether (1 mL). The solution was added to a disposable tube containing BrettPhos precatalyst (1.05 mg, 0.0013 mmol, 0.01 equiv) and NaO<sup>t</sup>Bu (15.2 mg, 0.158, 1.2 equiv), which had been previously evacuated and purged with Argon three times. The mixture was stirred at 110 °C for 2 h before being cooled, diluted with ethyl acetate, washed with water and brine, dried with magnesium sulfate, filtered, and concentrated. Silica gel chromatography with a Biotage (hexanes: ethyl acetate) yielded the title compound as a white solid (41 mg, 88%). <sup>1</sup>H NMR (400 MHz, CDCl<sub>3</sub>) δ: 7.35 (td, *J* = 1.3, 7.7, 7.7 Hz, 1H), 7.25 (ddd, *J* = 0.6, 1.3, 7.4 Hz, 1H), 7.20 (t, *J* = 8, 8, Hz, 1H), 7.06 (td, *J* = 1, 7.6, 7.6 Hz, 1H), 7.02 (s, 1H), 6.91 (m, 2H), 6.87 (dd, *J* = 1.9, 7.7 Hz, 2H), 6.73 (d, *J* = 7.6 Hz, 1H), 5.37 (s, 1H), 3.25 (s, 3H), 2.25 (s, 3H), 2.19 (s, 3H), 1.79 (s, 3H) ppm. <sup>13</sup>C NMR (400 MHz, CDCl<sub>3</sub>) δ: 179.4, 143.8, 143.1, 141.9, 140.8, 136.3, 134.9, 130.6, 129.3, 128.0, 124.5, 124.1, 122.7, 122.3, 118.6, 118.5, 116.2, 116.1, 108.2, 52.1, 26.4, 23.5, 21.1, 17.4 ppm. IR (neat, cm<sup>-1</sup>): 1707.0, 1611.6, 1471.2, 1373.3, 1346.3, 1102.8. Enantiomeric excess: 97%,

<sup>8</sup> Fors, B. P.; Watson, D. A.; Biscoe, M. R.; Buchwald, S. L. *J. Am. Chem. Soc.* **2008**, *130*, 13552.

Chiralcel OD-H column, 5% *i*PrOH, 95% hexanes;  $t_{\text{minor}} = 18.23$  min,  $t_{\text{major}} = 14.22$  min;  $[\alpha]_{\text{D}}^{21} -68.7^\circ$  ( $c = 0.736$ ,  $\text{CHCl}_3$ ). M. P.:  $48^\circ\text{C}$

X-ray crystallographic information for ent-4

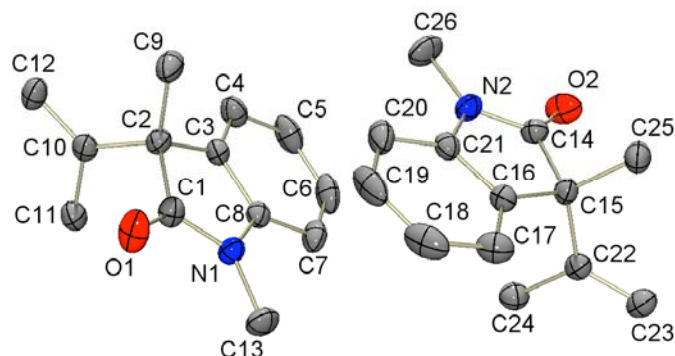

Table 1. Crystal data and structure refinement for **amt 4-3-4**.

|                                   |                                             |                  |
|-----------------------------------|---------------------------------------------|------------------|
| Empirical formula                 | C <sub>13</sub> H <sub>15</sub> N O         |                  |
| Formula weight                    | 201.26                                      |                  |
| Temperature                       | 100(2) K                                    |                  |
| Wavelength                        | 1.54178 Å                                   |                  |
| Crystal system                    | Monoclinic                                  |                  |
| Space group                       | P 21                                        |                  |
| Unit cell dimensions              | a = 7.3945(3) Å                             | α = 90°          |
|                                   | b = 17.4160(6) Å                            | β = 90.9340(10)° |
|                                   | c = 8.8582(3) Å                             | γ = 90°          |
| Volume                            | 1140.63(7) Å <sup>3</sup>                   |                  |
| Z                                 | 4                                           |                  |
| Density (calculated)              | 1.172 Mg/m <sup>3</sup>                     |                  |
| Absorption coefficient            | 0.581 mm <sup>-1</sup>                      |                  |
| F(000)                            | 432                                         |                  |
| Crystal size                      | 0.48 x 0.36 x 0.18 mm <sup>3</sup>          |                  |
| Theta range for data collection   | 4.99 to 68.59°                              |                  |
| Index ranges                      | -8 ≤ h ≤ 8, -20 ≤ k ≤ 21, -10 ≤ l ≤ 10      |                  |
| Reflections collected             | 15919                                       |                  |
| Independent reflections           | 3991 [R(int) = 0.0168]                      |                  |
| Completeness to theta = 68.59°    | 99.3 %                                      |                  |
| Absorption correction             | Semi-empirical from equivalents             |                  |
| Max. and min. transmission        | 0.9027 and 0.7680                           |                  |
| Refinement method                 | Full-matrix least-squares on F <sup>2</sup> |                  |
| Data / restraints / parameters    | 3991 / 1 / 271                              |                  |
| Goodness-of-fit on F <sup>2</sup> | 1.095                                       |                  |
| Final R indices [I > 2σ(I)]       | R1 = 0.0307, wR2 = 0.0848                   |                  |
| R indices (all data)              | R1 = 0.0307, wR2 = 0.0848                   |                  |
| Absolute structure parameter      | -0.03(19)                                   |                  |
| Largest diff. peak and hole       | 0.162 and -0.264 e.Å <sup>-3</sup>          |                  |

Table 2. Atomic coordinates ( $\times 10^4$ ) and equivalent isotropic displacement parameters ( $\text{\AA}^2 \times 10^3$ ) for **amt 4-3-4**.  $U(\text{eq})$  is defined as one third of the trace of the orthogonalized  $U^{ij}$  tensor.

|       | x        | y       | z        | U(eq) |
|-------|----------|---------|----------|-------|
| N(1)  | 9740(2)  | 1327(1) | 2357(1)  | 25(1) |
| O(1)  | 9268(2)  | 73(1)   | 1644(1)  | 39(1) |
| C(1)  | 9447(2)  | 750(1)  | 1337(2)  | 26(1) |
| N(2)  | 4981(2)  | 3388(1) | 2657(1)  | 27(1) |
| O(2)  | 4793(2)  | 4670(1) | 3250(1)  | 38(1) |
| C(2)  | 9341(2)  | 1109(1) | -266(2)  | 24(1) |
| C(3)  | 9689(2)  | 1949(1) | 82(2)    | 24(1) |
| C(4)  | 9818(2)  | 2578(1) | -856(2)  | 32(1) |
| C(5)  | 10138(2) | 3300(1) | -214(2)  | 40(1) |
| C(6)  | 10311(2) | 3383(1) | 1337(2)  | 39(1) |
| C(7)  | 10190(2) | 2753(1) | 2299(2)  | 32(1) |
| C(8)  | 9889(2)  | 2042(1) | 1639(2)  | 24(1) |
| C(9)  | 7419(2)  | 978(1)  | -891(2)  | 35(1) |
| C(10) | 10819(2) | 765(1)  | -1239(2) | 24(1) |
| C(11) | 12722(2) | 879(1)  | -659(2)  | 30(1) |
| C(12) | 10468(2) | 396(1)  | -2522(2) | 31(1) |
| C(13) | 9870(2)  | 1212(1) | 3981(2)  | 34(1) |
| C(14) | 4788(2)  | 3996(1) | 3615(2)  | 25(1) |
| C(15) | 4518(2)  | 3680(1) | 5225(2)  | 23(1) |
| C(16) | 4673(2)  | 2820(1) | 4963(2)  | 23(1) |
| C(17) | 4586(2)  | 2211(1) | 5963(2)  | 33(1) |
| C(18) | 4744(2)  | 1467(1) | 5399(2)  | 43(1) |
| C(19) | 4969(2)  | 1343(1) | 3877(2)  | 44(1) |
| C(20) | 5059(2)  | 1952(1) | 2850(2)  | 36(1) |
| C(21) | 4918(2)  | 2686(1) | 3432(2)  | 24(1) |
| C(22) | 6023(2)  | 3974(1) | 6278(2)  | 24(1) |
| C(23) | 5692(2)  | 4331(1) | 7569(2)  | 31(1) |
| C(24) | 7916(2)  | 3824(1) | 5766(2)  | 30(1) |
| C(25) | 2615(2)  | 3908(1) | 5720(2)  | 33(1) |
| C(26) | 5209(2)  | 3460(1) | 1034(2)  | 40(1) |



Table 3. Bond lengths [Å] and angles [°] for **amt 4-3-4**.

---

|                  |            |
|------------------|------------|
| N(1)-C(1)        | 1.3662(19) |
| N(1)-C(8)        | 1.4033(19) |
| N(1)-C(13)       | 1.4536(18) |
| O(1)-C(1)        | 1.2184(18) |
| C(1)-C(2)        | 1.5516(19) |
| N(2)-C(14)       | 1.3647(18) |
| N(2)-C(21)       | 1.4046(19) |
| N(2)-C(26)       | 1.4558(17) |
| O(2)-C(14)       | 1.2173(18) |
| C(2)-C(3)        | 1.5170(19) |
| C(2)-C(10)       | 1.526(2)   |
| C(2)-C(9)        | 1.534(2)   |
| C(3)-C(4)        | 1.379(2)   |
| C(3)-C(8)        | 1.3944(19) |
| C(4)-C(5)        | 1.398(2)   |
| C(5)-C(6)        | 1.386(3)   |
| C(6)-C(7)        | 1.392(2)   |
| C(7)-C(8)        | 1.386(2)   |
| C(10)-C(12)      | 1.326(2)   |
| C(10)-C(11)      | 1.504(2)   |
| C(14)-C(15)      | 1.5448(18) |
| C(15)-C(16)      | 1.5206(19) |
| C(15)-C(22)      | 1.5287(19) |
| C(15)-C(25)      | 1.532(2)   |
| C(16)-C(17)      | 1.384(2)   |
| C(16)-C(21)      | 1.391(2)   |
| C(17)-C(18)      | 1.395(2)   |
| C(18)-C(19)      | 1.378(3)   |
| C(19)-C(20)      | 1.400(3)   |
| C(20)-C(21)      | 1.382(2)   |
| C(22)-C(23)      | 1.327(2)   |
| C(22)-C(24)      | 1.501(2)   |
|                  |            |
| C(1)-N(1)-C(8)   | 111.40(11) |
| C(1)-N(1)-C(13)  | 124.12(13) |
| C(8)-N(1)-C(13)  | 124.48(12) |
| O(1)-C(1)-N(1)   | 125.46(13) |
| O(1)-C(1)-C(2)   | 126.16(13) |
| N(1)-C(1)-C(2)   | 108.36(12) |
| C(14)-N(2)-C(21) | 111.53(11) |
| C(14)-N(2)-C(26) | 124.24(14) |
| C(21)-N(2)-C(26) | 124.22(14) |
| C(3)-C(2)-C(10)  | 111.91(11) |
| C(3)-C(2)-C(9)   | 111.69(12) |
| C(10)-C(2)-C(9)  | 113.96(12) |
| C(3)-C(2)-C(1)   | 101.32(11) |
| C(10)-C(2)-C(1)  | 109.44(11) |
| C(9)-C(2)-C(1)   | 107.66(12) |
| C(4)-C(3)-C(8)   | 119.76(14) |
| C(4)-C(3)-C(2)   | 131.12(13) |
| C(8)-C(3)-C(2)   | 109.12(12) |
| C(3)-C(4)-C(5)   | 118.84(15) |
| C(6)-C(5)-C(4)   | 120.62(15) |
| C(5)-C(6)-C(7)   | 121.27(15) |
| C(8)-C(7)-C(6)   | 117.20(14) |
| C(7)-C(8)-C(3)   | 122.31(14) |

|                   |            |
|-------------------|------------|
| C(7)-C(8)-N(1)    | 127.94(13) |
| C(3)-C(8)-N(1)    | 109.75(12) |
| C(12)-C(10)-C(11) | 121.68(14) |
| C(12)-C(10)-C(2)  | 122.83(13) |
| C(11)-C(10)-C(2)  | 115.49(12) |
| O(2)-C(14)-N(2)   | 125.55(13) |
| O(2)-C(14)-C(15)  | 126.08(13) |
| N(2)-C(14)-C(15)  | 108.35(11) |
| C(16)-C(15)-C(22) | 111.53(11) |
| C(16)-C(15)-C(25) | 111.75(12) |
| C(22)-C(15)-C(25) | 113.69(12) |
| C(16)-C(15)-C(14) | 101.41(11) |
| C(22)-C(15)-C(14) | 109.90(11) |
| C(25)-C(15)-C(14) | 107.77(12) |
| C(17)-C(16)-C(21) | 120.18(14) |
| C(17)-C(16)-C(15) | 130.75(13) |
| C(21)-C(16)-C(15) | 109.06(12) |
| C(16)-C(17)-C(18) | 118.56(16) |
| C(19)-C(18)-C(17) | 120.59(16) |
| C(18)-C(19)-C(20) | 121.60(15) |
| C(21)-C(20)-C(19) | 116.95(15) |
| C(20)-C(21)-C(16) | 122.12(14) |
| C(20)-C(21)-N(2)  | 128.29(14) |
| C(16)-C(21)-N(2)  | 109.60(12) |
| C(23)-C(22)-C(24) | 121.86(13) |
| C(23)-C(22)-C(15) | 122.63(14) |
| C(24)-C(22)-C(15) | 115.51(12) |

---

Symmetry transformations used to generate equivalent atoms:

Table 4. Anisotropic displacement parameters ( $\text{\AA}^2 \times 10^3$ ) for **amt 4-3-4**. The anisotropic displacement factor exponent takes the form:  $-2\pi^2 [ h^2 a^* U^{11} + \dots + 2 h k a^* b^* U^{12} ]$

|       | U <sup>11</sup> | U <sup>22</sup> | U <sup>33</sup> | U <sup>23</sup> | U <sup>13</sup> | U <sup>12</sup> |
|-------|-----------------|-----------------|-----------------|-----------------|-----------------|-----------------|
| N(1)  | 30(1)           | 25(1)           | 20(1)           | 1(1)            | 0(1)            | -1(1)           |
| O(1)  | 59(1)           | 23(1)           | 36(1)           | 4(1)            | 14(1)           | -4(1)           |
| C(1)  | 29(1)           | 25(1)           | 25(1)           | 1(1)            | 4(1)            | -1(1)           |
| N(2)  | 28(1)           | 33(1)           | 19(1)           | 1(1)            | 1(1)            | -1(1)           |
| O(2)  | 55(1)           | 23(1)           | 38(1)           | 10(1)           | -10(1)          | -2(1)           |
| C(2)  | 26(1)           | 22(1)           | 22(1)           | -1(1)           | -1(1)           | -2(1)           |
| C(3)  | 23(1)           | 24(1)           | 25(1)           | -1(1)           | 0(1)            | 3(1)            |
| C(4)  | 36(1)           | 28(1)           | 32(1)           | 7(1)            | 4(1)            | 6(1)            |
| C(5)  | 39(1)           | 23(1)           | 57(1)           | 10(1)           | 10(1)           | 5(1)            |
| C(6)  | 35(1)           | 22(1)           | 61(1)           | -11(1)          | 9(1)            | -1(1)           |
| C(7)  | 29(1)           | 30(1)           | 36(1)           | -12(1)          | 1(1)            | -3(1)           |
| C(8)  | 20(1)           | 25(1)           | 26(1)           | -2(1)           | 0(1)            | 0(1)            |
| C(9)  | 25(1)           | 44(1)           | 36(1)           | -15(1)          | -1(1)           | 0(1)            |
| C(10) | 30(1)           | 20(1)           | 23(1)           | 4(1)            | 1(1)            | 1(1)            |
| C(11) | 27(1)           | 31(1)           | 33(1)           | -1(1)           | 2(1)            | 4(1)            |
| C(12) | 41(1)           | 27(1)           | 25(1)           | -2(1)           | 4(1)            | 0(1)            |
| C(13) | 38(1)           | 45(1)           | 20(1)           | 3(1)            | -1(1)           | 0(1)            |
| C(14) | 27(1)           | 24(1)           | 23(1)           | 2(1)            | -3(1)           | -1(1)           |
| C(15) | 26(1)           | 21(1)           | 21(1)           | -1(1)           | 1(1)            | 1(1)            |
| C(16) | 23(1)           | 21(1)           | 26(1)           | 0(1)            | -2(1)           | -1(1)           |
| C(17) | 33(1)           | 30(1)           | 36(1)           | 8(1)            | -5(1)           | -6(1)           |
| C(18) | 40(1)           | 25(1)           | 64(1)           | 12(1)           | -17(1)          | -7(1)           |
| C(19) | 34(1)           | 19(1)           | 77(1)           | -10(1)          | -15(1)          | 2(1)            |
| C(20) | 29(1)           | 35(1)           | 43(1)           | -17(1)          | -4(1)           | 4(1)            |
| C(21) | 20(1)           | 24(1)           | 29(1)           | -2(1)           | -1(1)           | 1(1)            |
| C(22) | 30(1)           | 19(1)           | 23(1)           | 2(1)            | -1(1)           | -1(1)           |
| C(23) | 40(1)           | 29(1)           | 25(1)           | -1(1)           | -3(1)           | -2(1)           |
| C(24) | 27(1)           | 33(1)           | 30(1)           | 1(1)            | -2(1)           | -3(1)           |
| C(25) | 26(1)           | 40(1)           | 34(1)           | -12(1)          | 0(1)            | 3(1)            |
| C(26) | 39(1)           | 62(1)           | 19(1)           | -1(1)           | 3(1)            | -5(1)           |

Table 5. Hydrogen coordinates ( $\times 10^4$ ) and isotropic displacement parameters ( $\text{\AA}^2 \times 10^3$ ) for **amt 4-3-4**.

|        | x     | y    | z     | U(eq) |
|--------|-------|------|-------|-------|
| H(4A)  | 9691  | 2522 | -1919 | 38    |
| H(5A)  | 10238 | 3737 | -847  | 48    |
| H(6A)  | 10516 | 3879 | 1753  | 47    |
| H(7A)  | 10309 | 2809 | 3363  | 38    |
| H(9A)  | 7306  | 1206 | -1899 | 53    |
| H(9B)  | 6545  | 1219 | -219  | 53    |
| H(9C)  | 7177  | 426  | -953  | 53    |
| H(11A) | 13569 | 632  | -1348 | 45    |
| H(11B) | 12851 | 649  | 347   | 45    |
| H(11C) | 12988 | 1429 | -598  | 45    |
| H(12A) | 11432 | 196  | -3099 | 37    |
| H(12B) | 9253  | 332  | -2863 | 37    |
| H(13A) | 9727  | 666  | 4210  | 51    |
| H(13B) | 8917  | 1506 | 4475  | 51    |
| H(13C) | 11055 | 1388 | 4352  | 51    |
| H(17A) | 4423  | 2298 | 7010  | 40    |
| H(18A) | 4696  | 1042 | 6069  | 52    |
| H(19A) | 5066  | 831  | 3516  | 52    |
| H(20A) | 5210  | 1865 | 1801  | 43    |
| H(23A) | 6667  | 4498 | 8198  | 37    |
| H(23B) | 4480  | 4418 | 7864  | 37    |
| H(24A) | 8780  | 4034 | 6508  | 45    |
| H(24B) | 8097  | 4071 | 4786  | 45    |
| H(24C) | 8105  | 3269 | 5670  | 45    |
| H(25A) | 2408  | 3715 | 6742  | 50    |
| H(25B) | 1717  | 3686 | 5022  | 50    |
| H(25C) | 2503  | 4469 | 5712  | 50    |
| H(26A) | 5224  | 4004 | 755   | 60    |
| H(26B) | 4204  | 3203 | 506   | 60    |
| H(26C) | 6353  | 3220 | 748   | 60    |



amt3-217-2 2 1 Z: BCatay  
amt 3-217-2

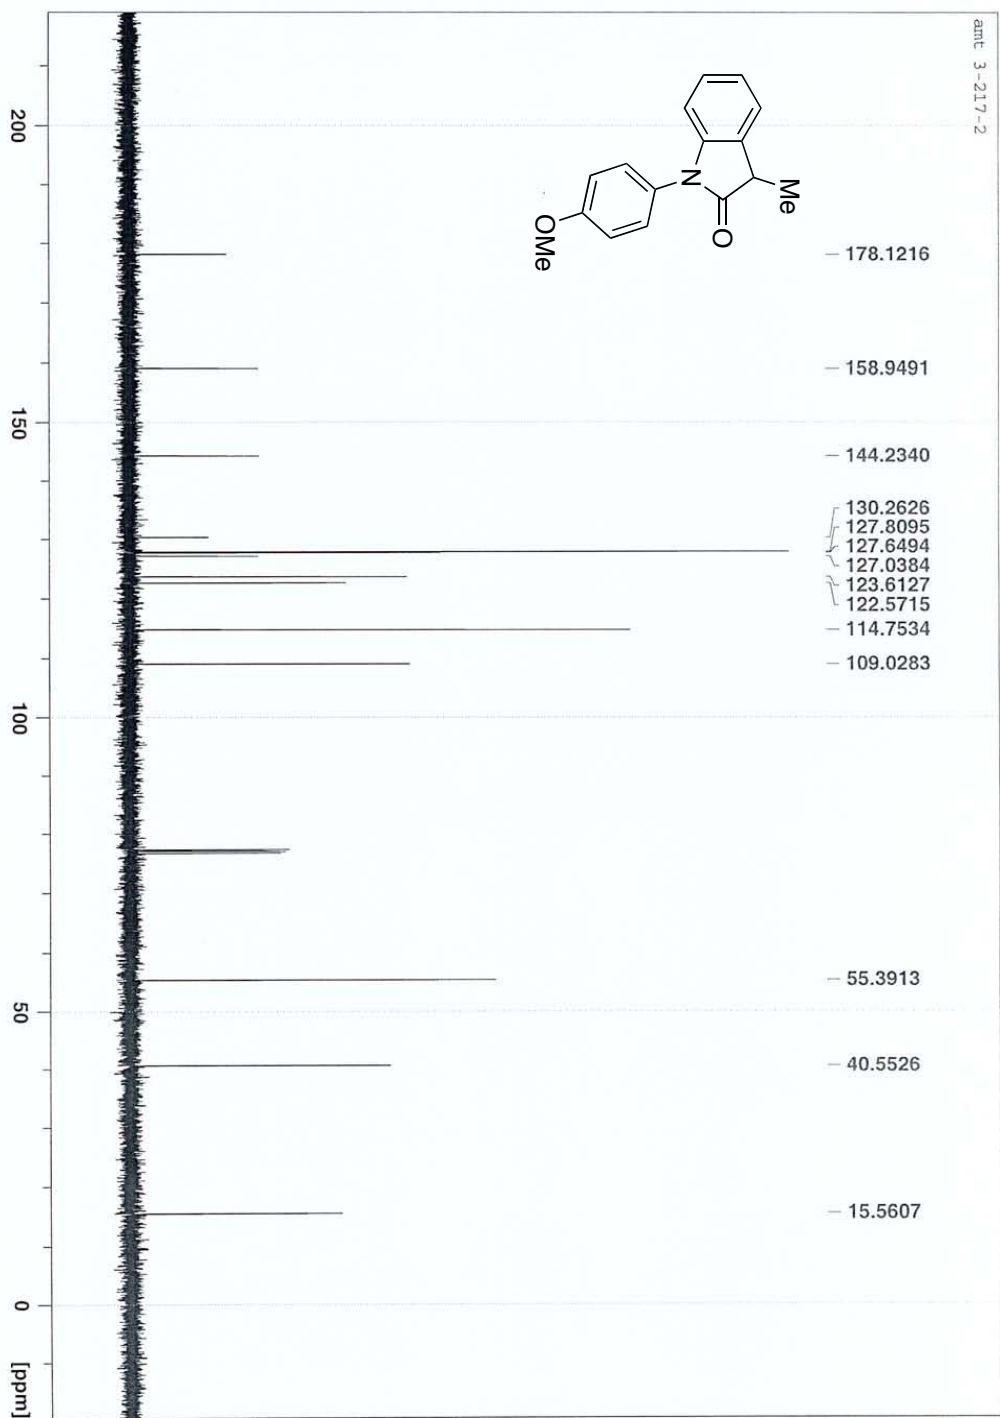



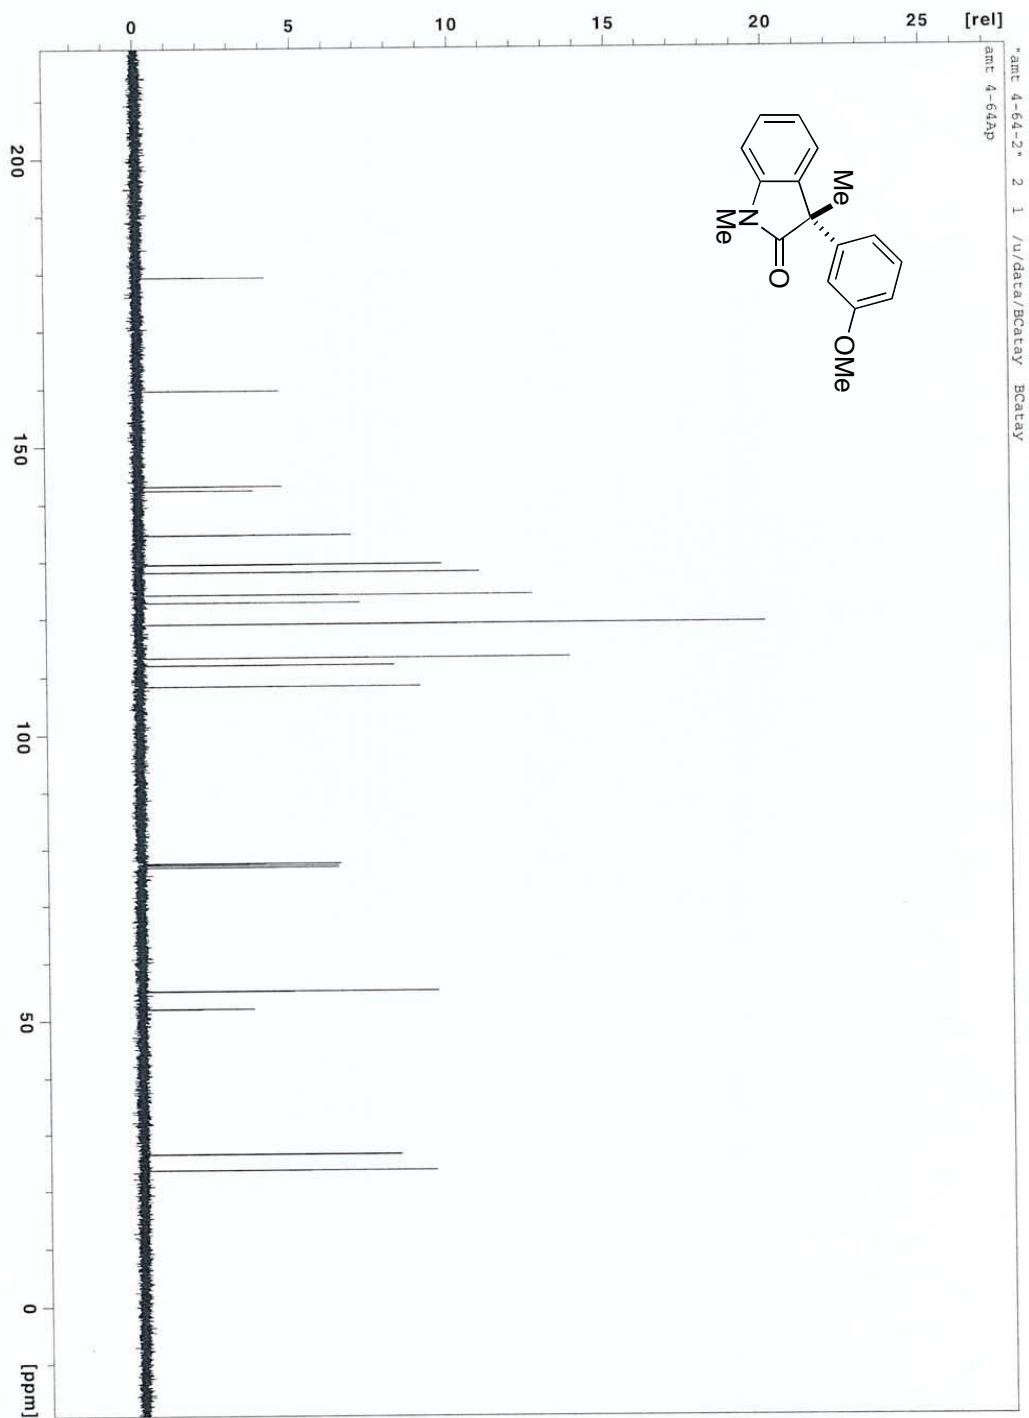



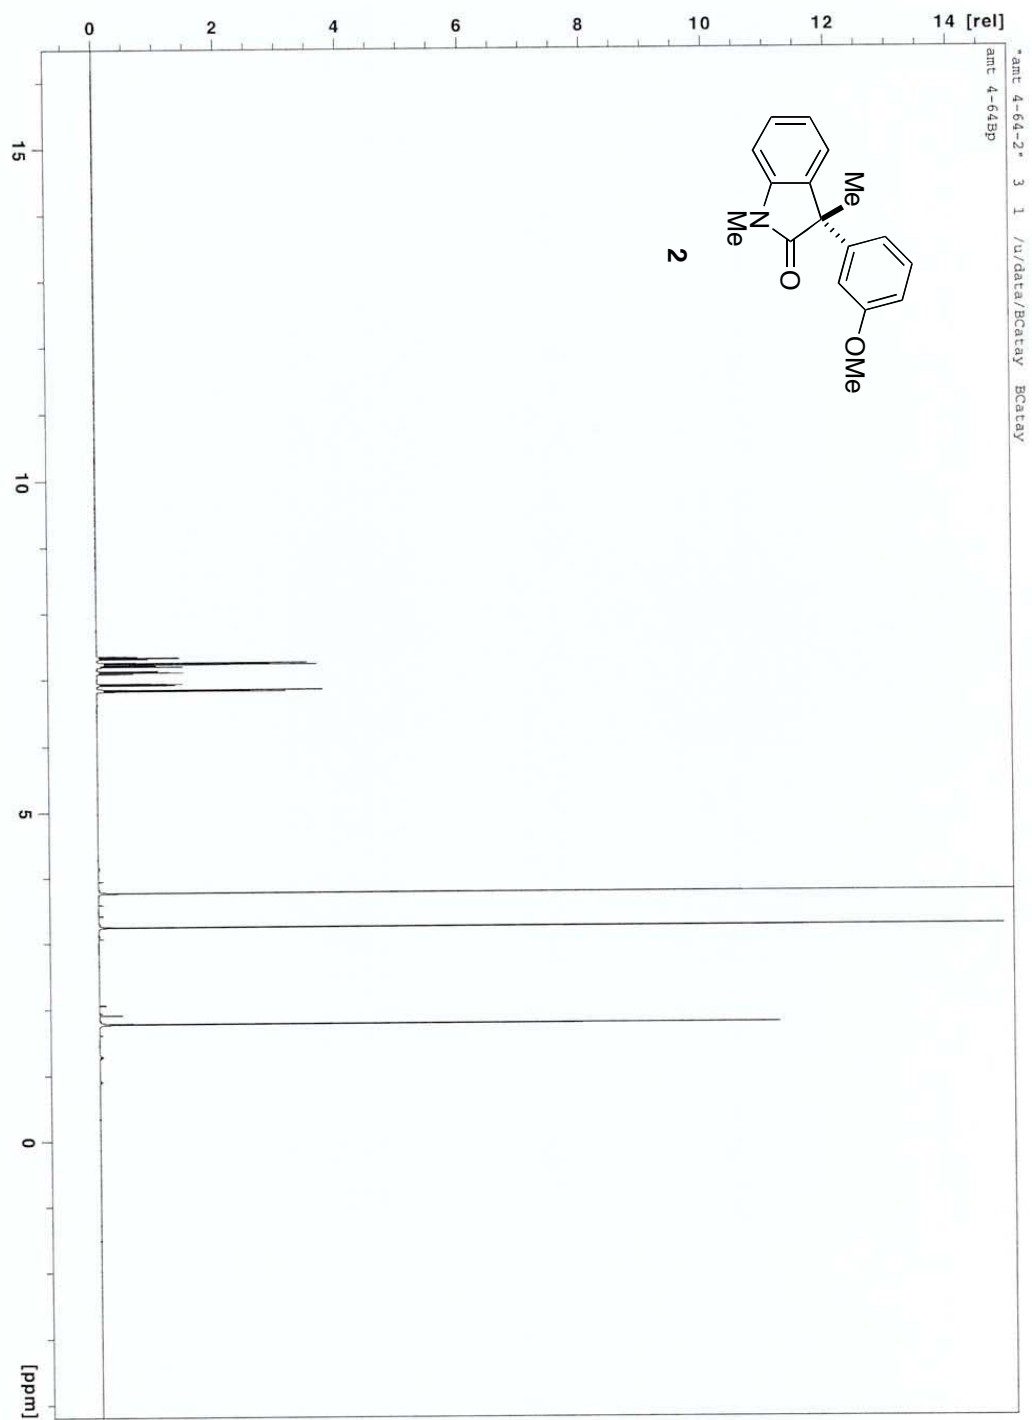

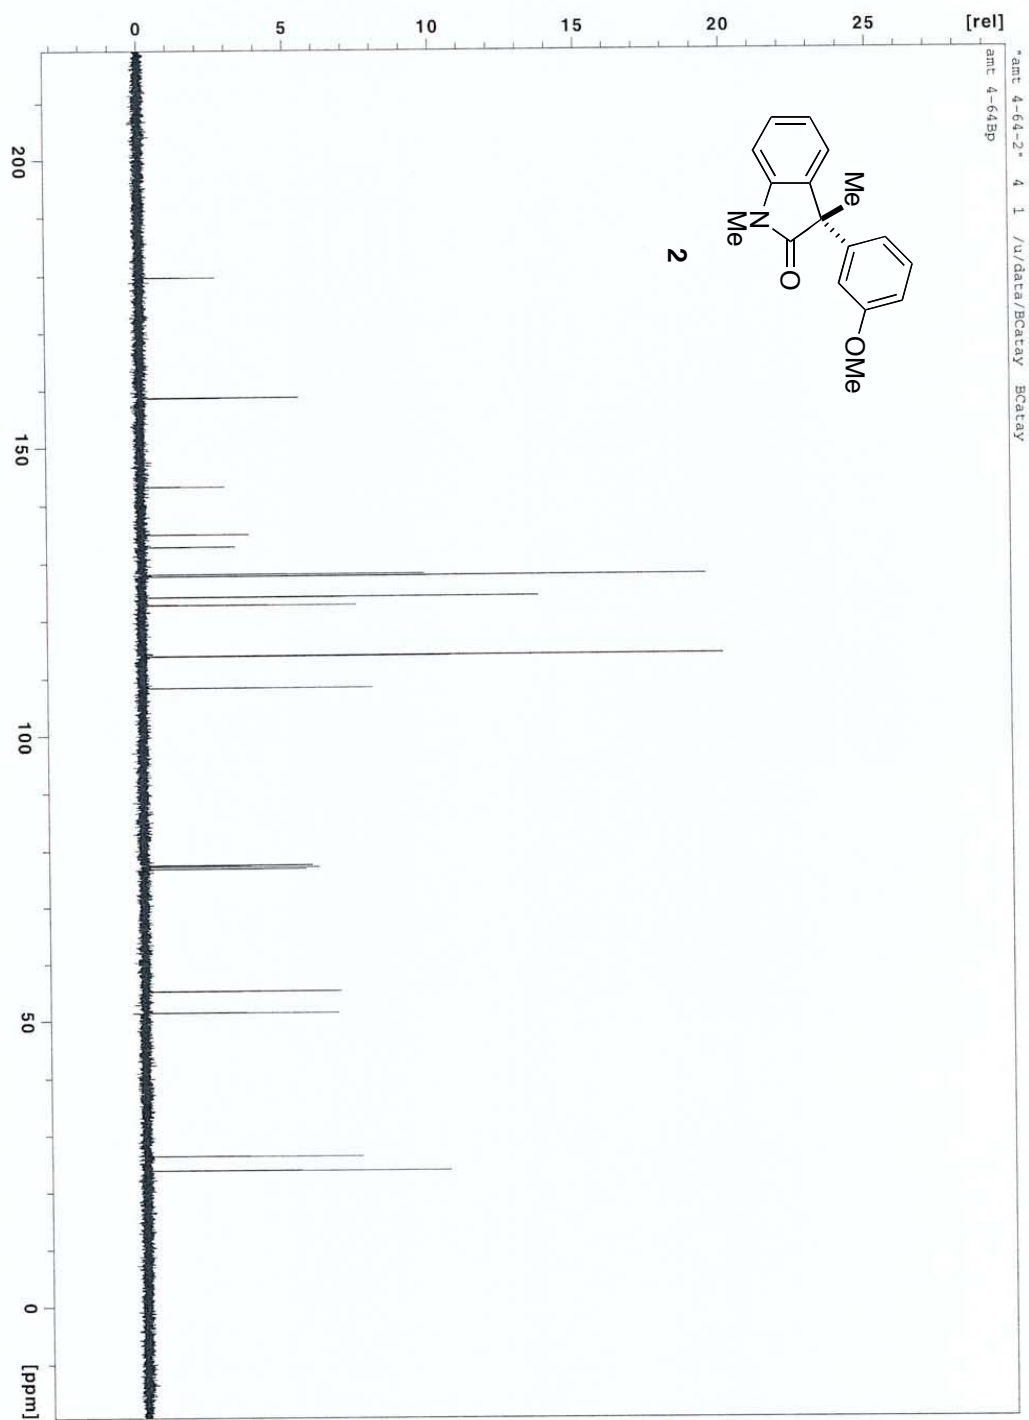

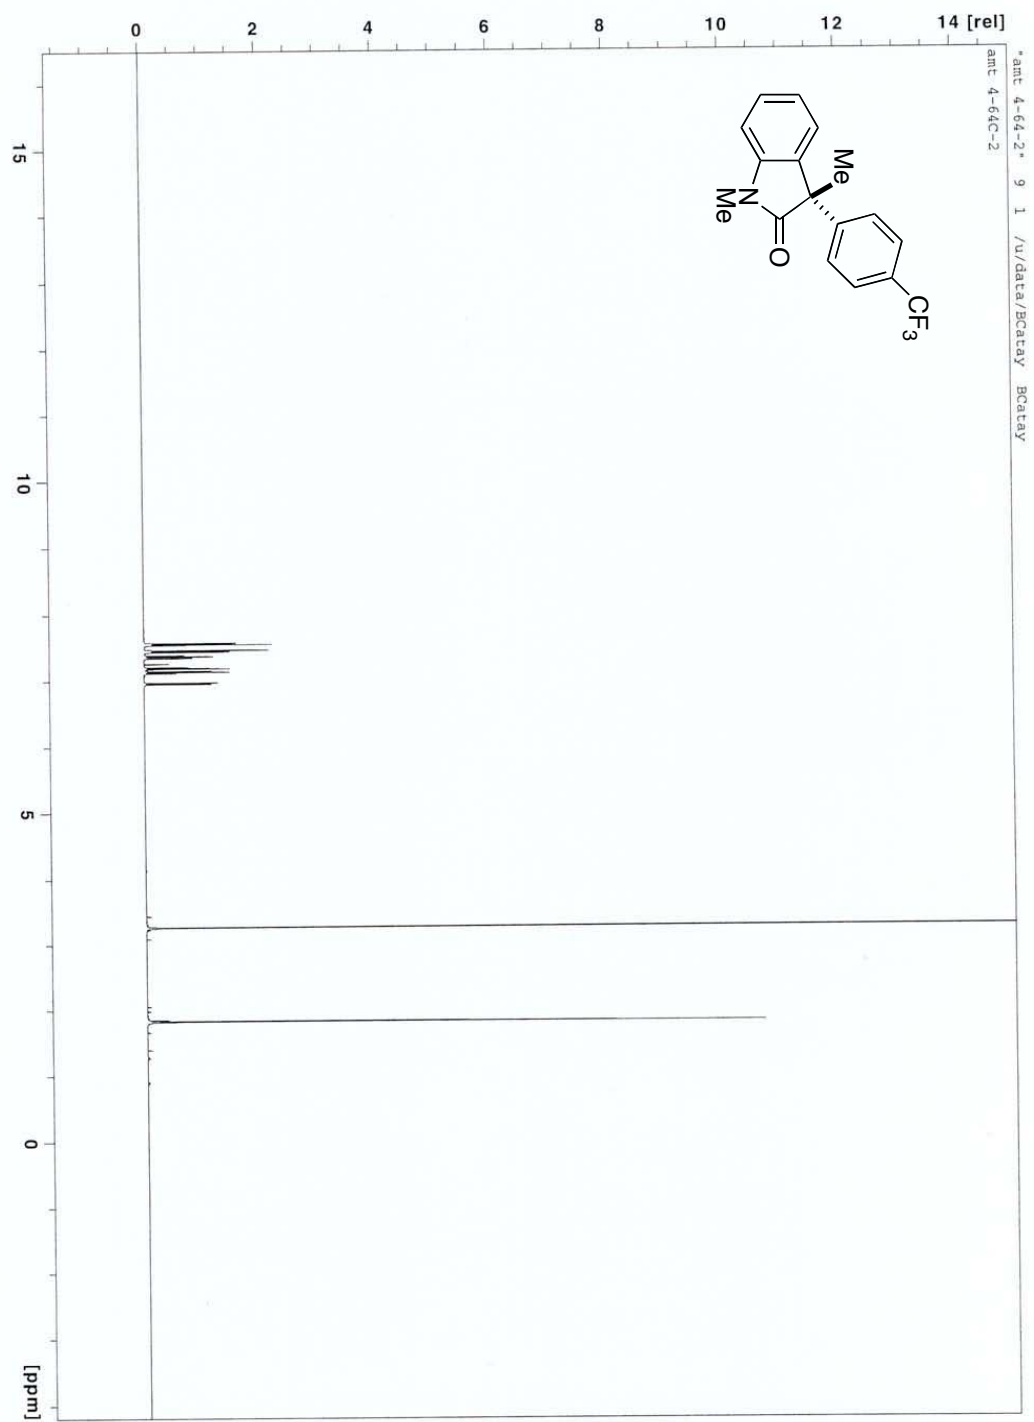

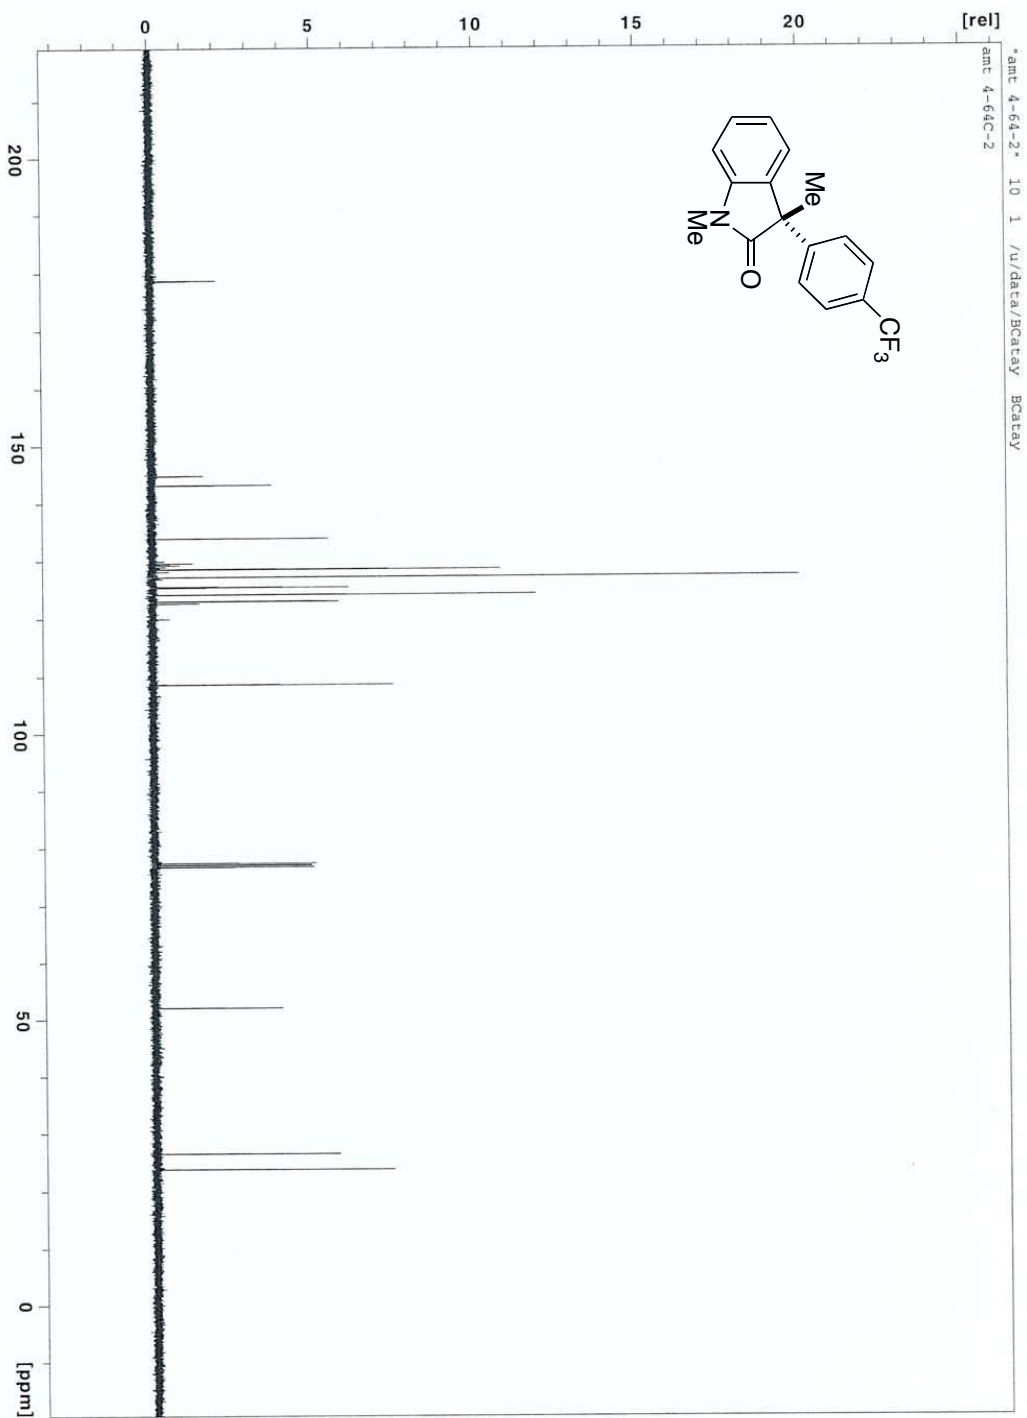

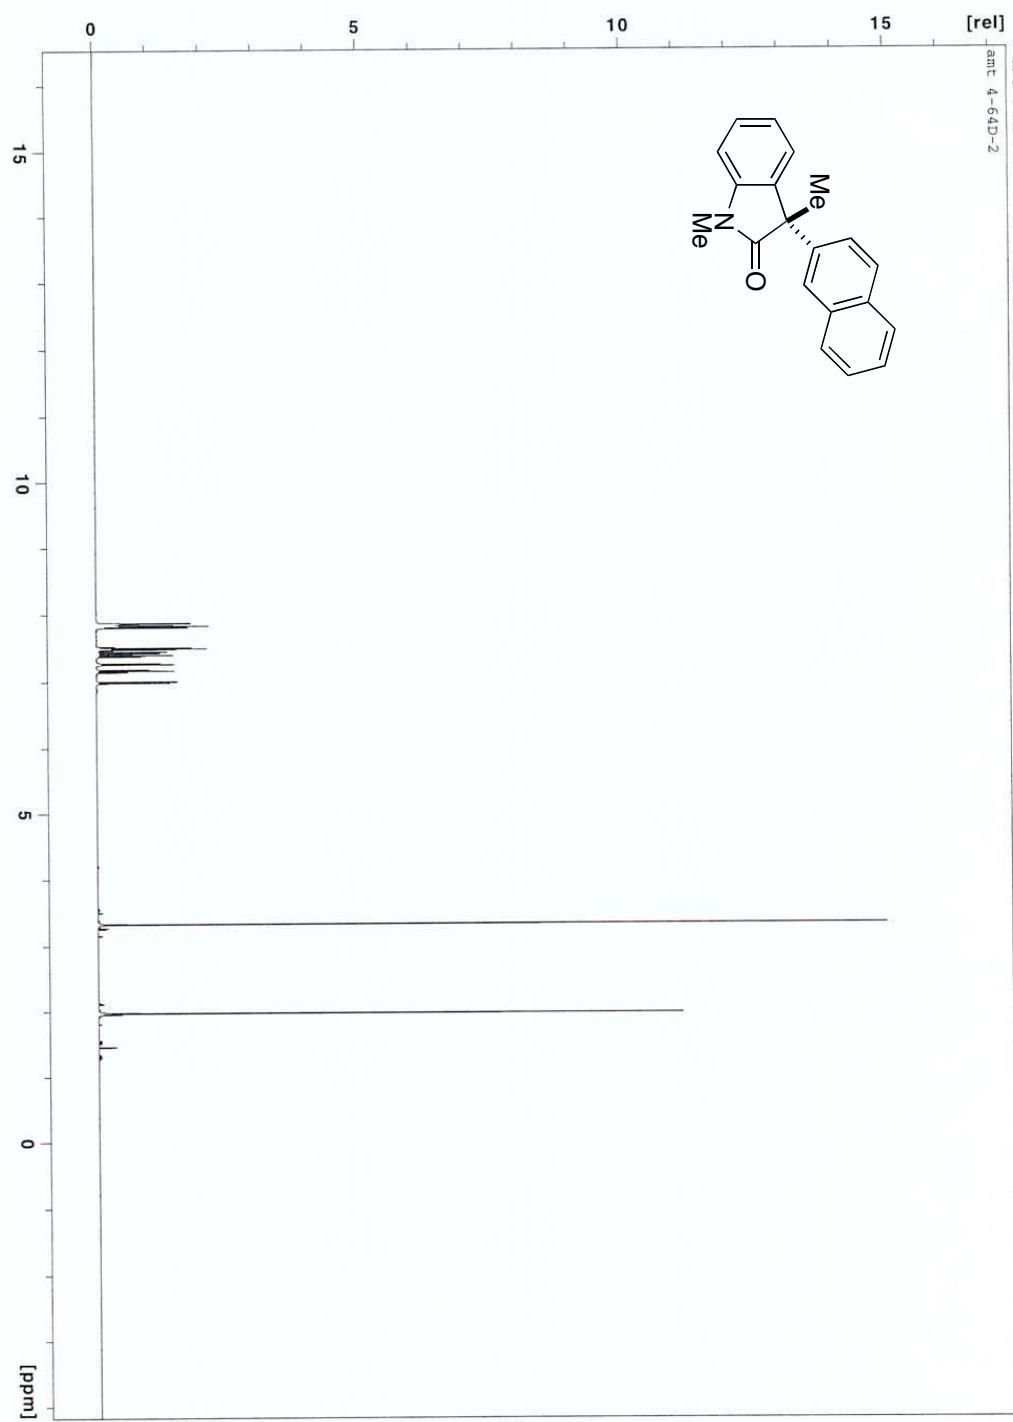

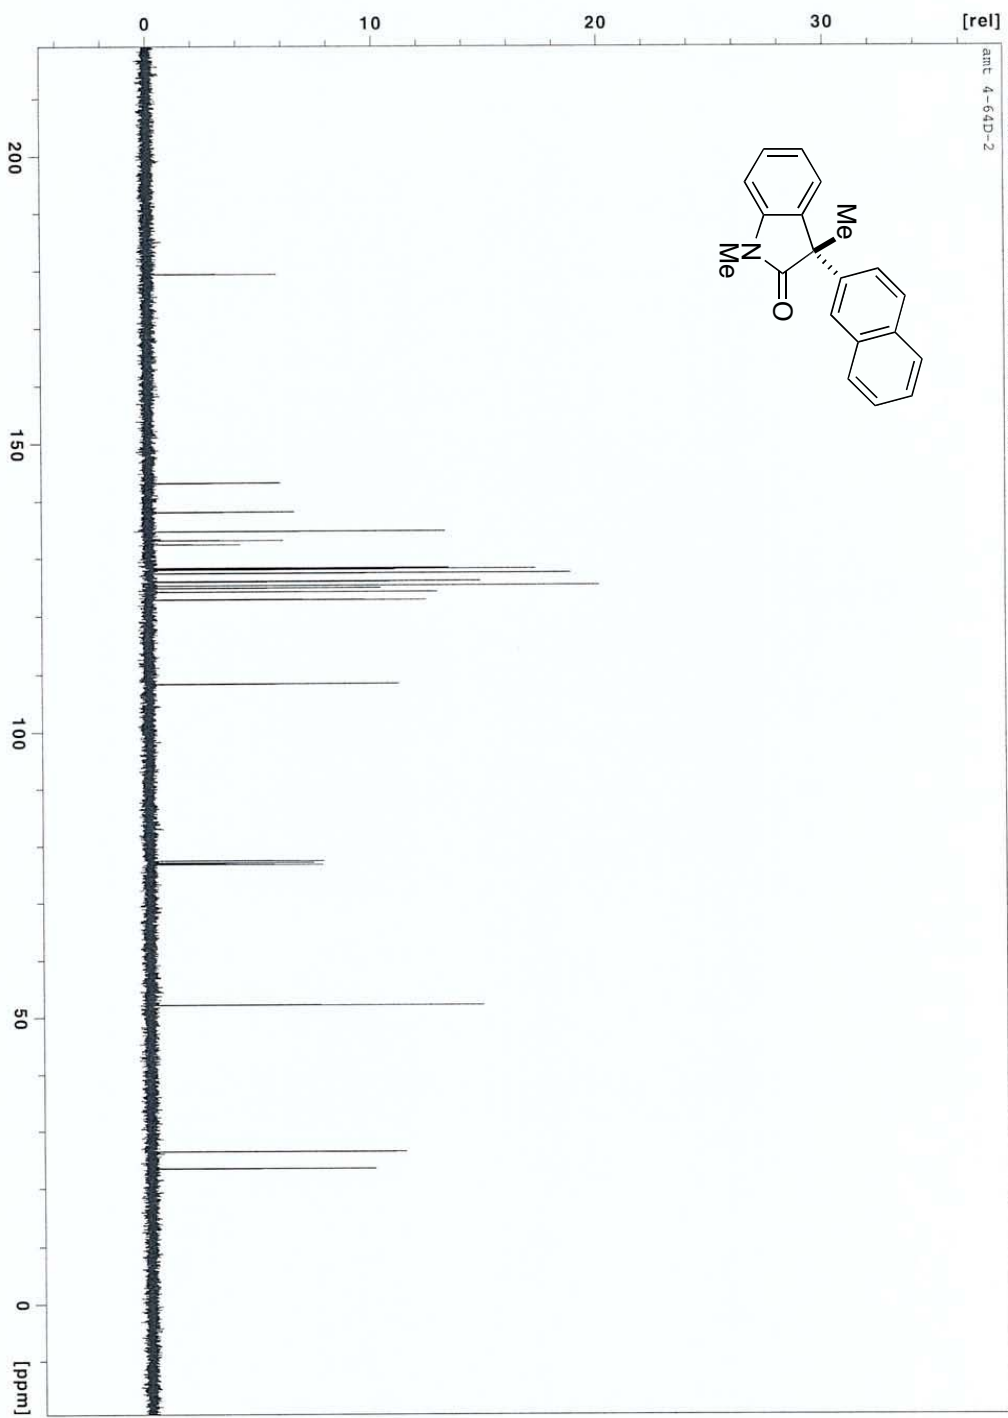

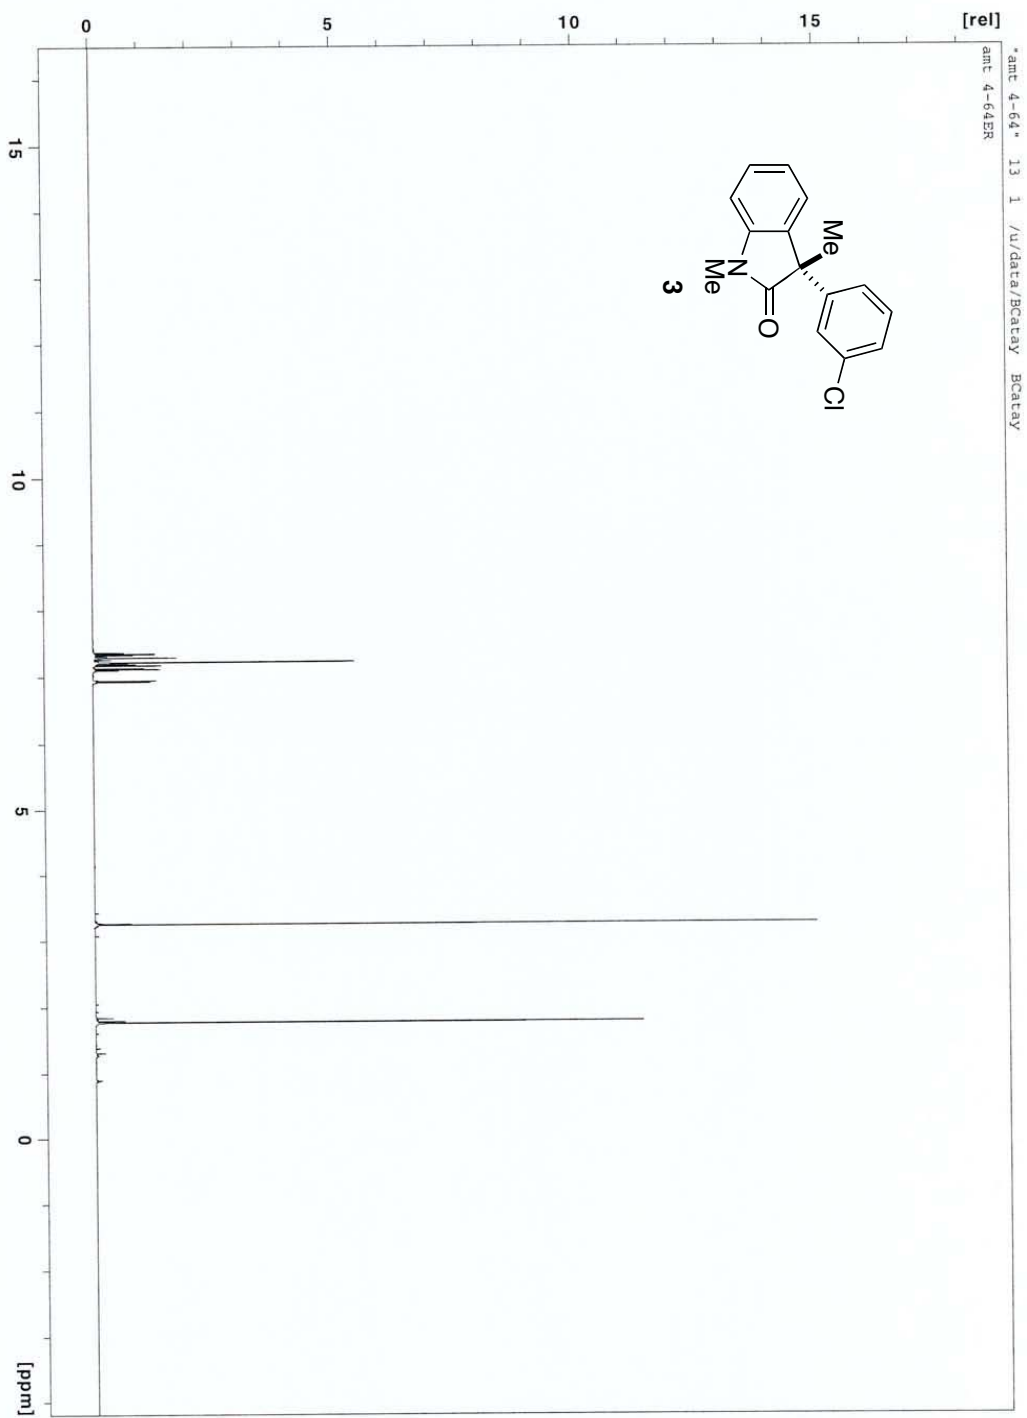

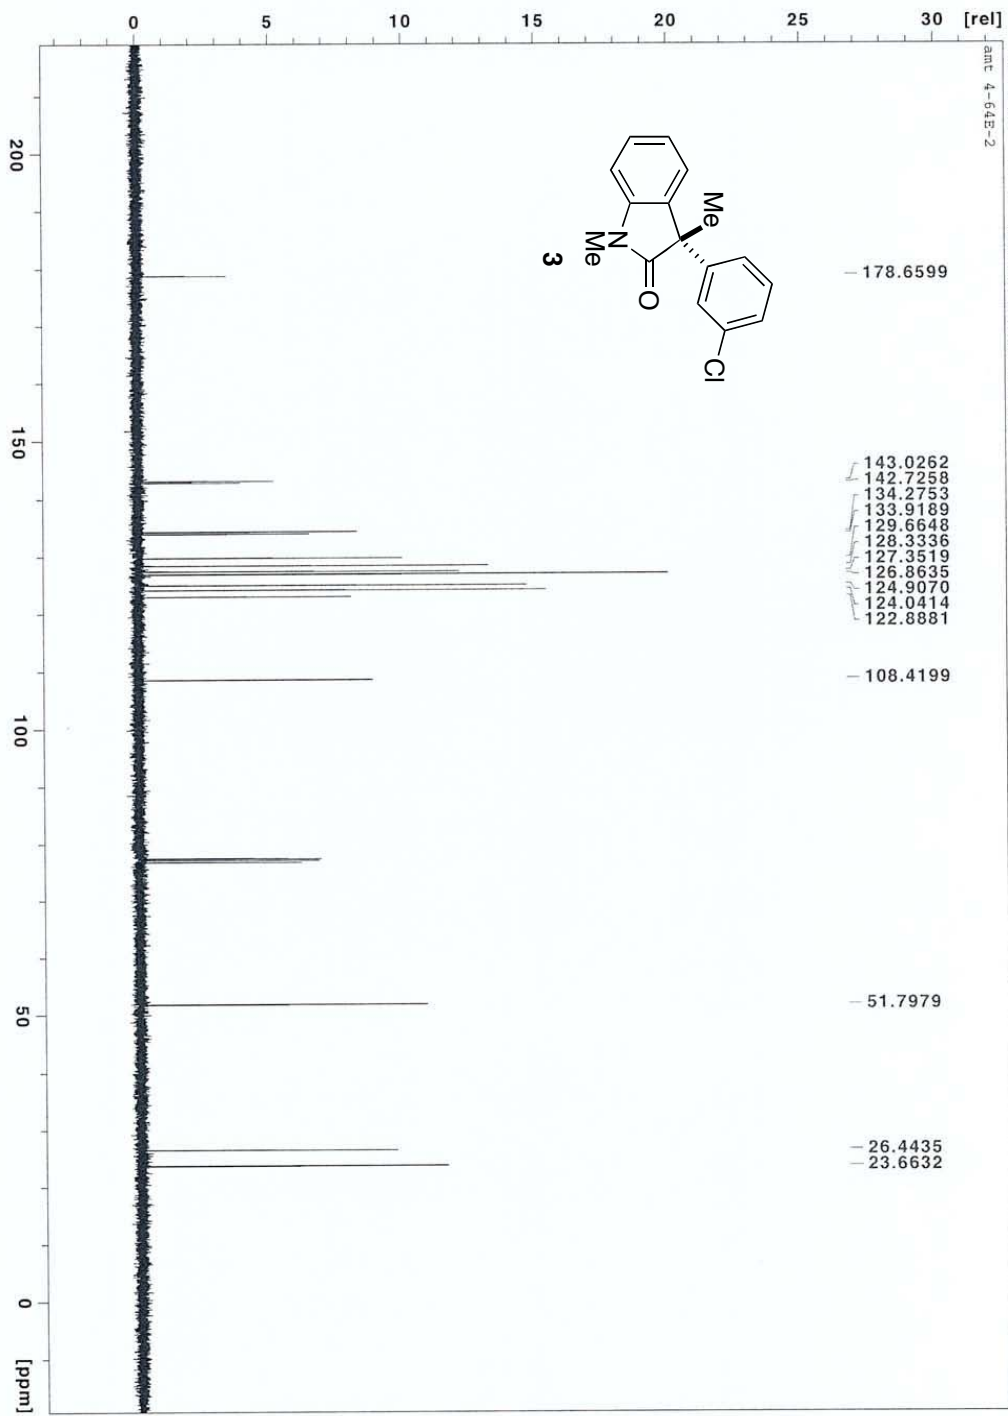



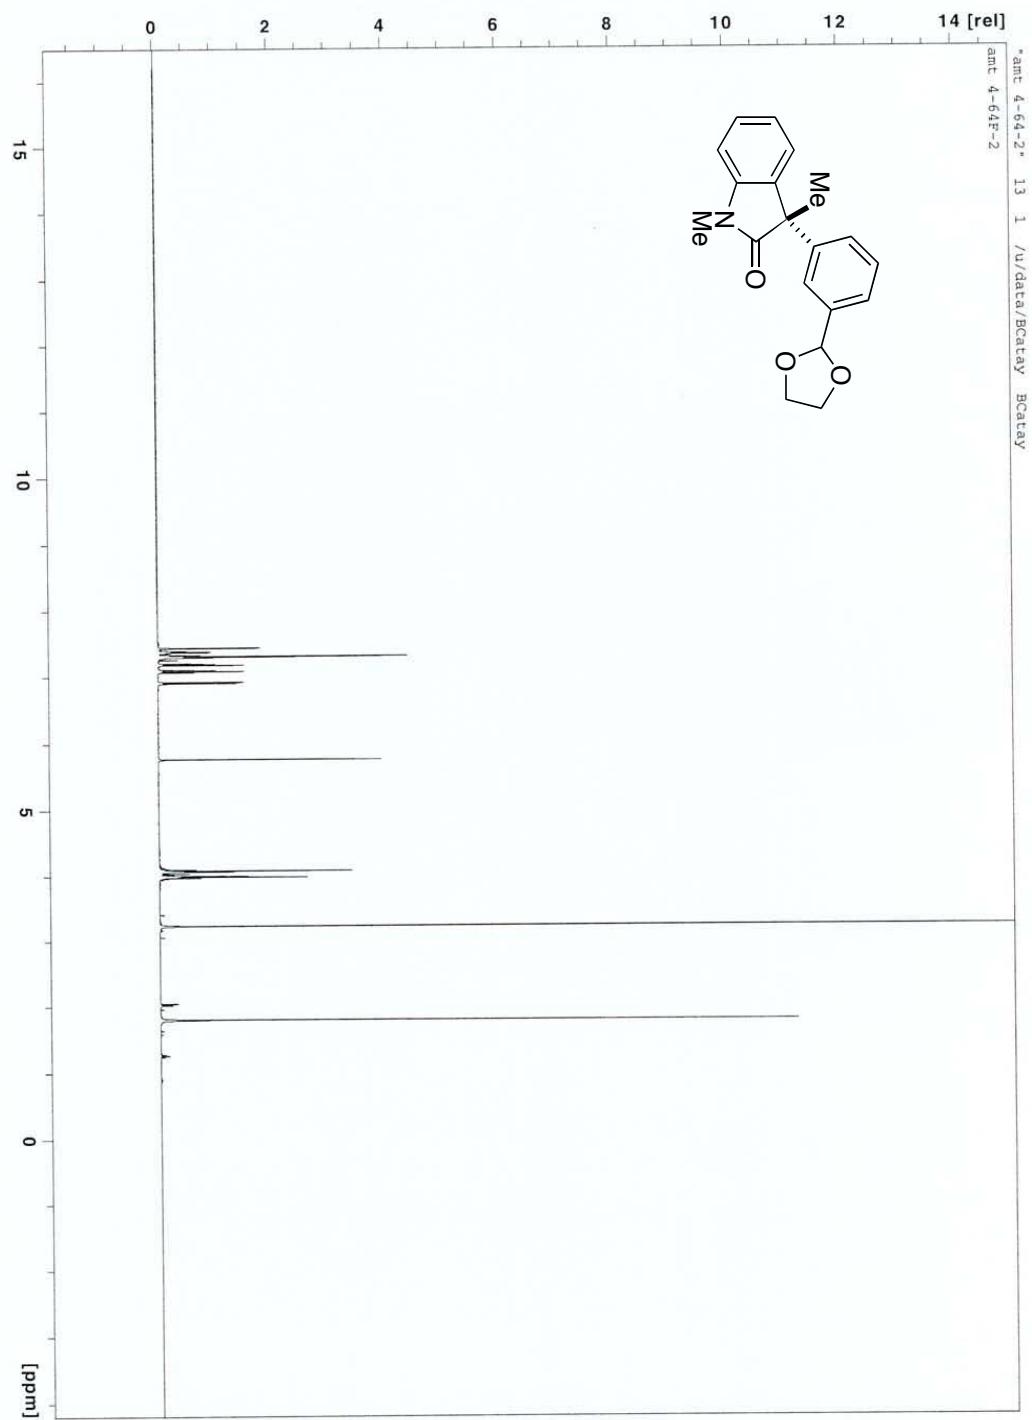

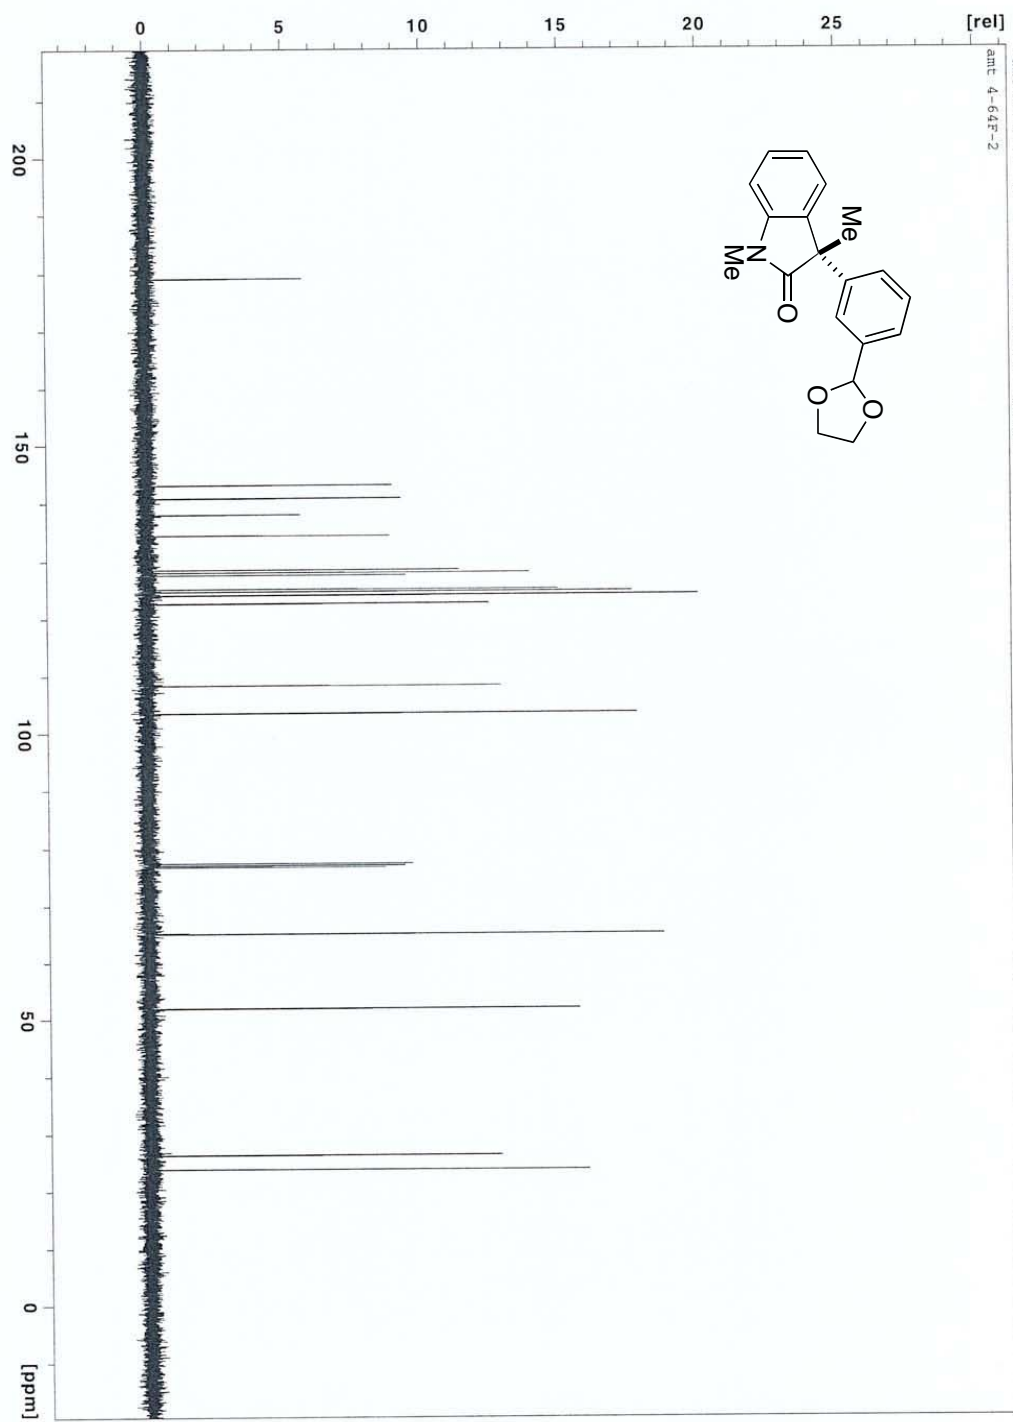

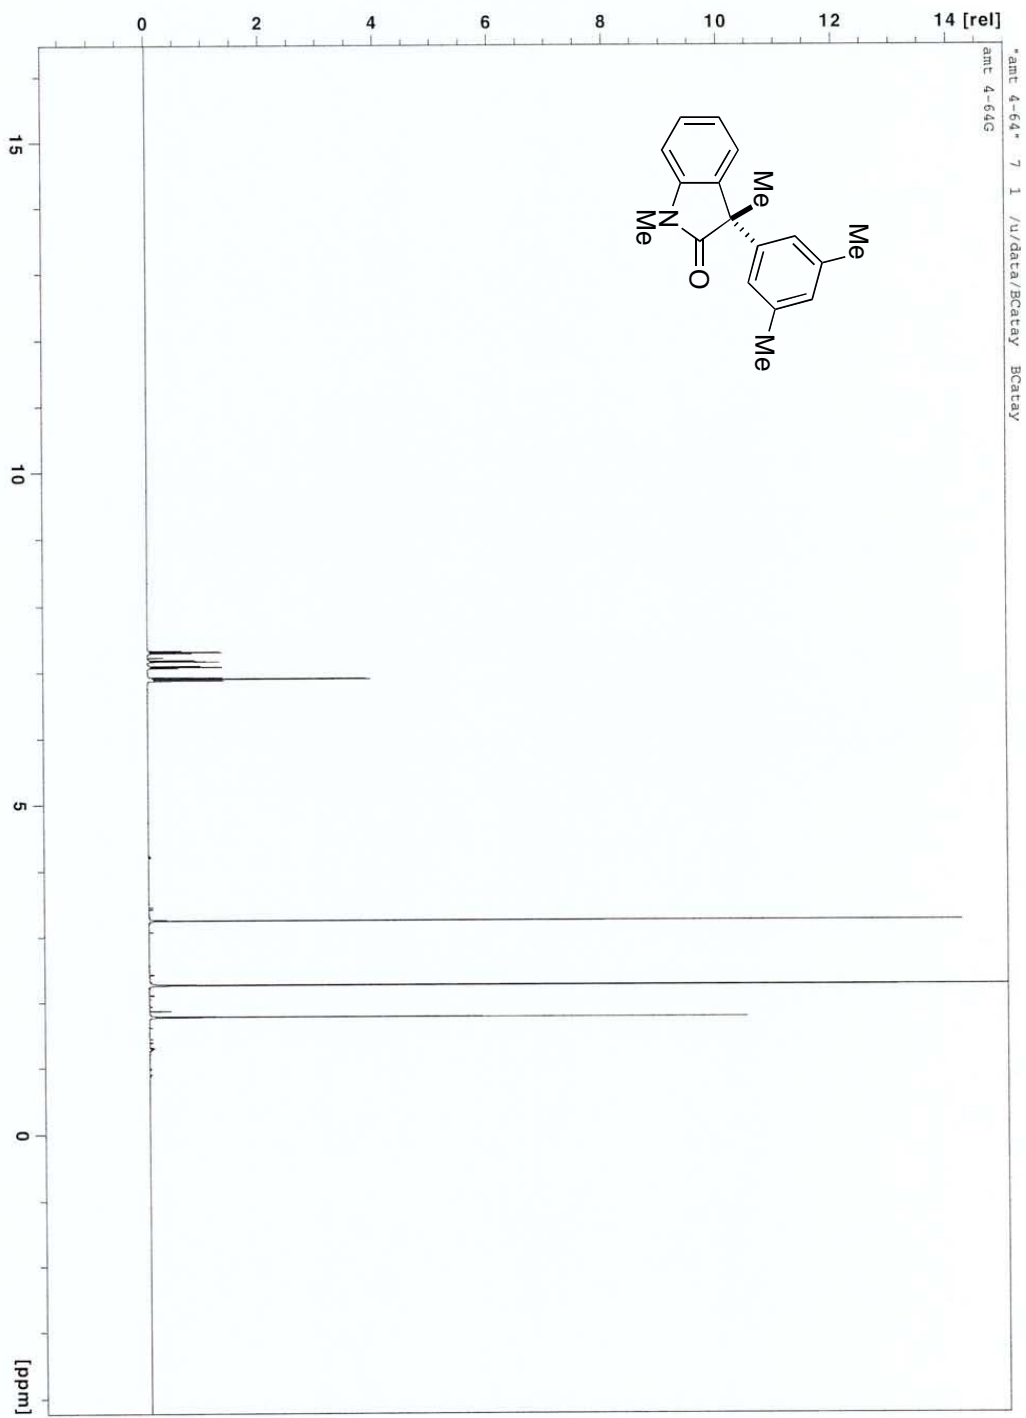

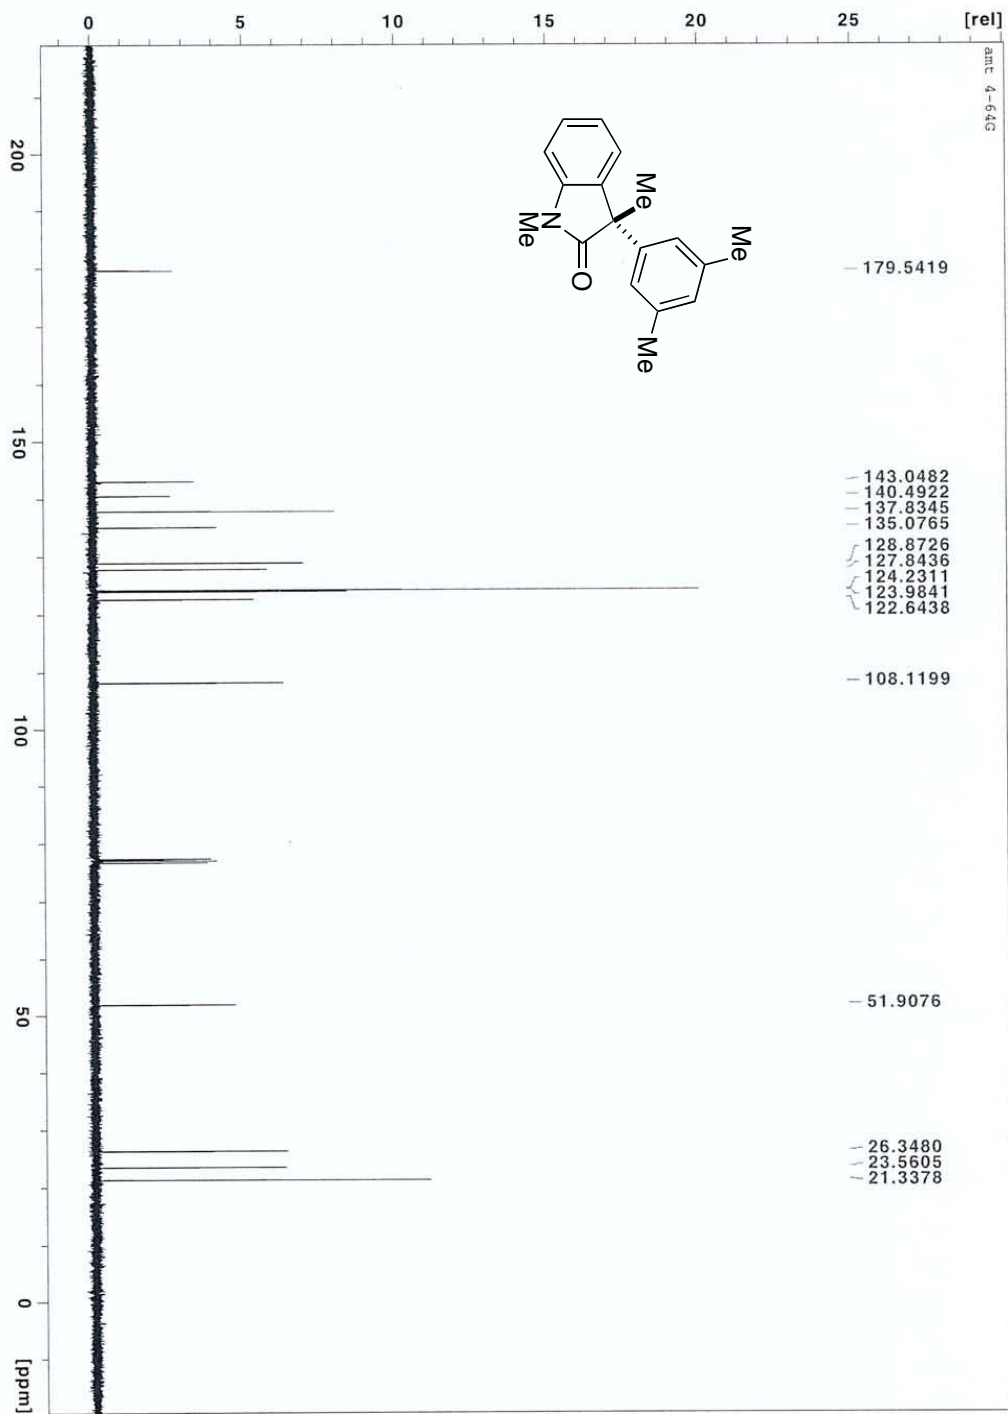

amt 4-69A-2trans  
Pulse Sequence: s2pu1  
Solvent: CDCl3  
Ambient temperature  
INOVA-500 "pu1lwink1e"  
Relax. delay 2.000 sec  
Pulse 88.7 degrees  
Acq. time 3.001 sec  
Width 10504.2 Hz  
16 repetitions  
OBSERVE H1, 499.7417206 MHz  
DATA PROCESSING  
FT size 262144  
Total time 1 min, 20 sec

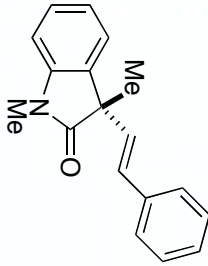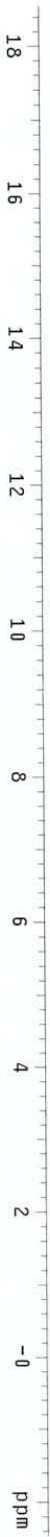

amt 4-69A-21trans  
Pulse Sequence: s2pul  
Solvent: CDCl3  
Ambient Temperature  
User: 1-14-87  
INOVA-500 "bui1w1nk1e"  
Relax. delay 3.000 sec  
Pulse 33.6 degrees  
Acq. time 2.000 sec  
Width 31397.2 Hz  
64 Repetitions  
OBSERVE C13, 125.6601718 MHz  
DECUPLE H1, 499.742194 MHz  
Power 34 db  
CONTINUOUSLY ON  
WALTZ16 MODULATED  
DATA PROCESSING  
Line broadening 1.0 Hz  
FT size 131072  
Total time 10 min, 41 sec

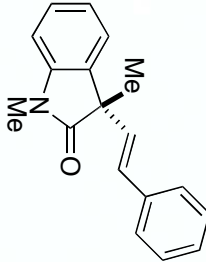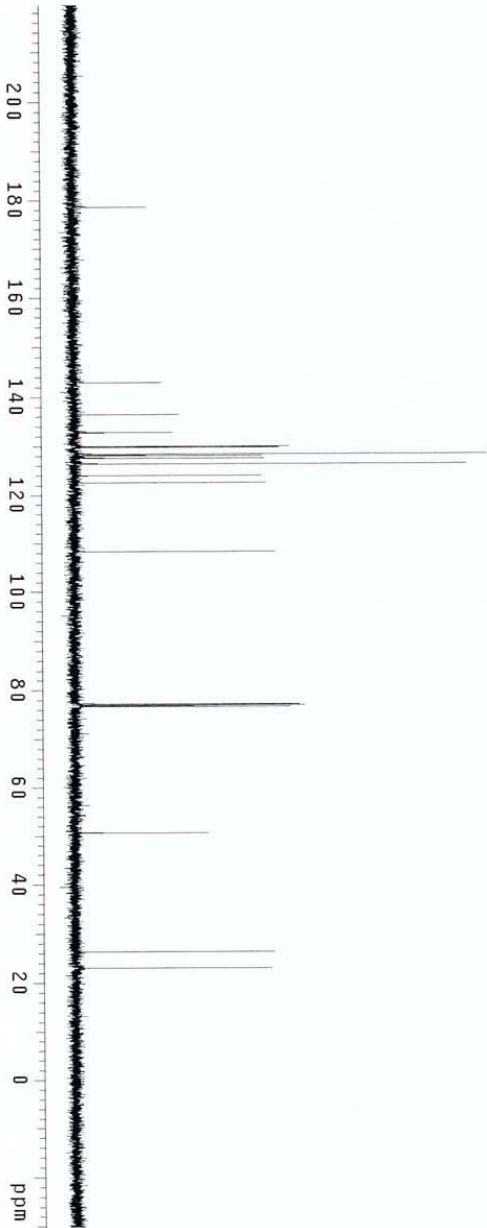

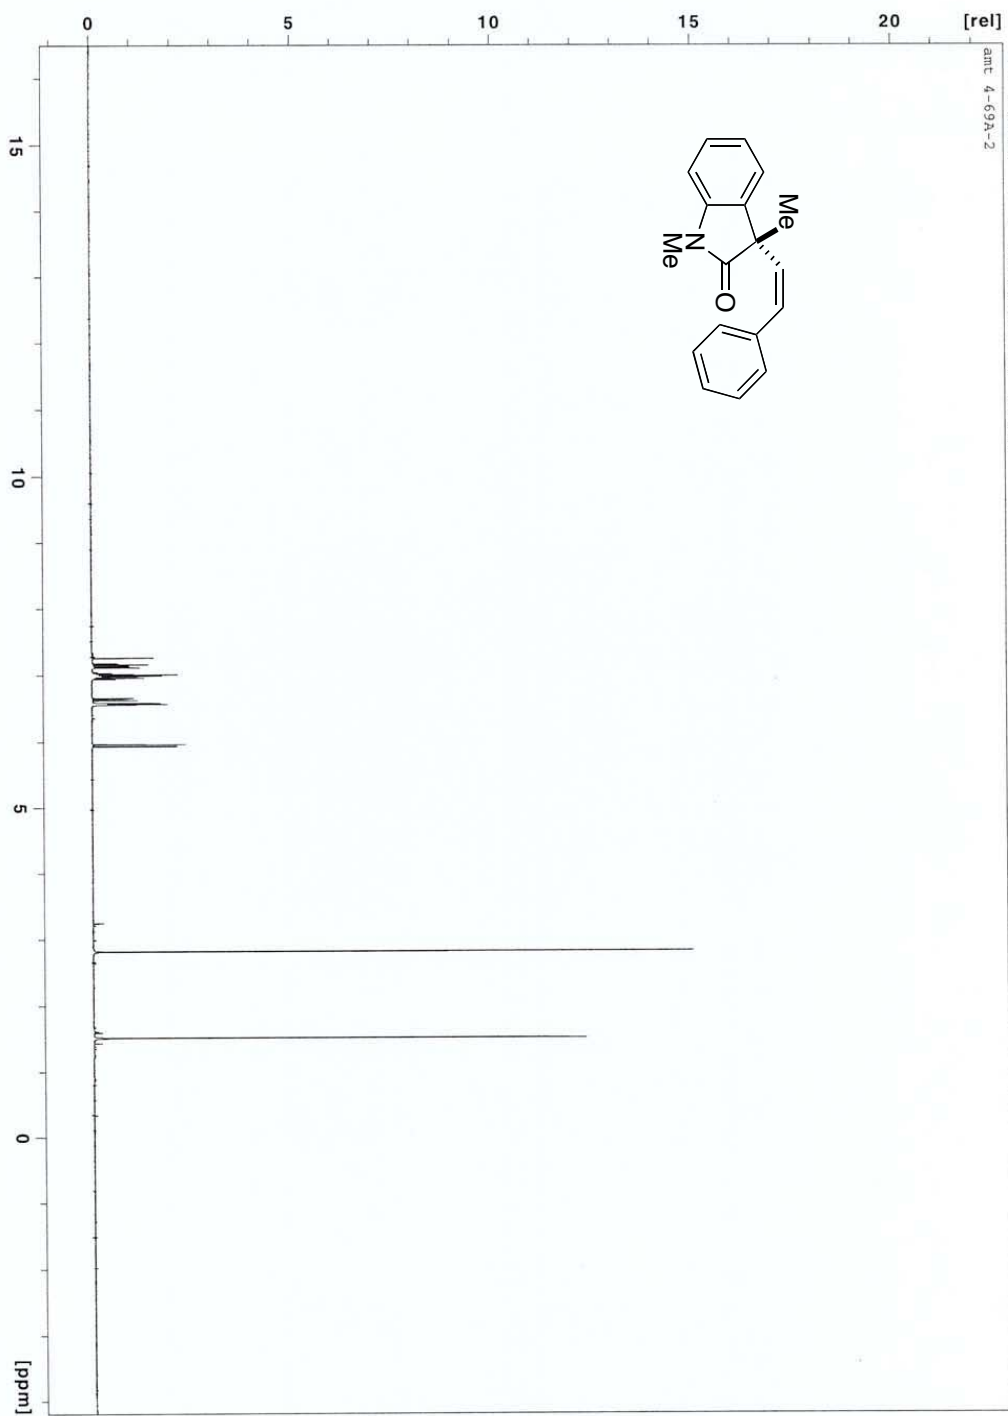

amt 4-69Actis  
Pulse Sequence: s2pul  
Solvent: CDCl3  
Ambient temperature  
User: 1-14-87  
INOVA-500 "buiwinkle"  
Relax. delay 3.000 sec  
Pulse 33.6 degrees  
Acq. time 2.000 sec  
Width 31397.2 Hz  
312 repetitions  
OBSERVE C13, 125.6601593 MHz  
DECUPLE H1, 499.7442194 MHz  
Power 34 dB  
CONTINUOUSLY ON  
NOT AUTO TUNED  
DATA PROCESSING  
Line broadening 1.0 Hz  
FT size 131072  
Total time 1 hr, 23 min, 28 sec

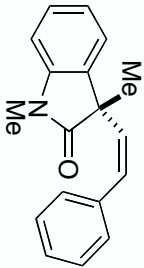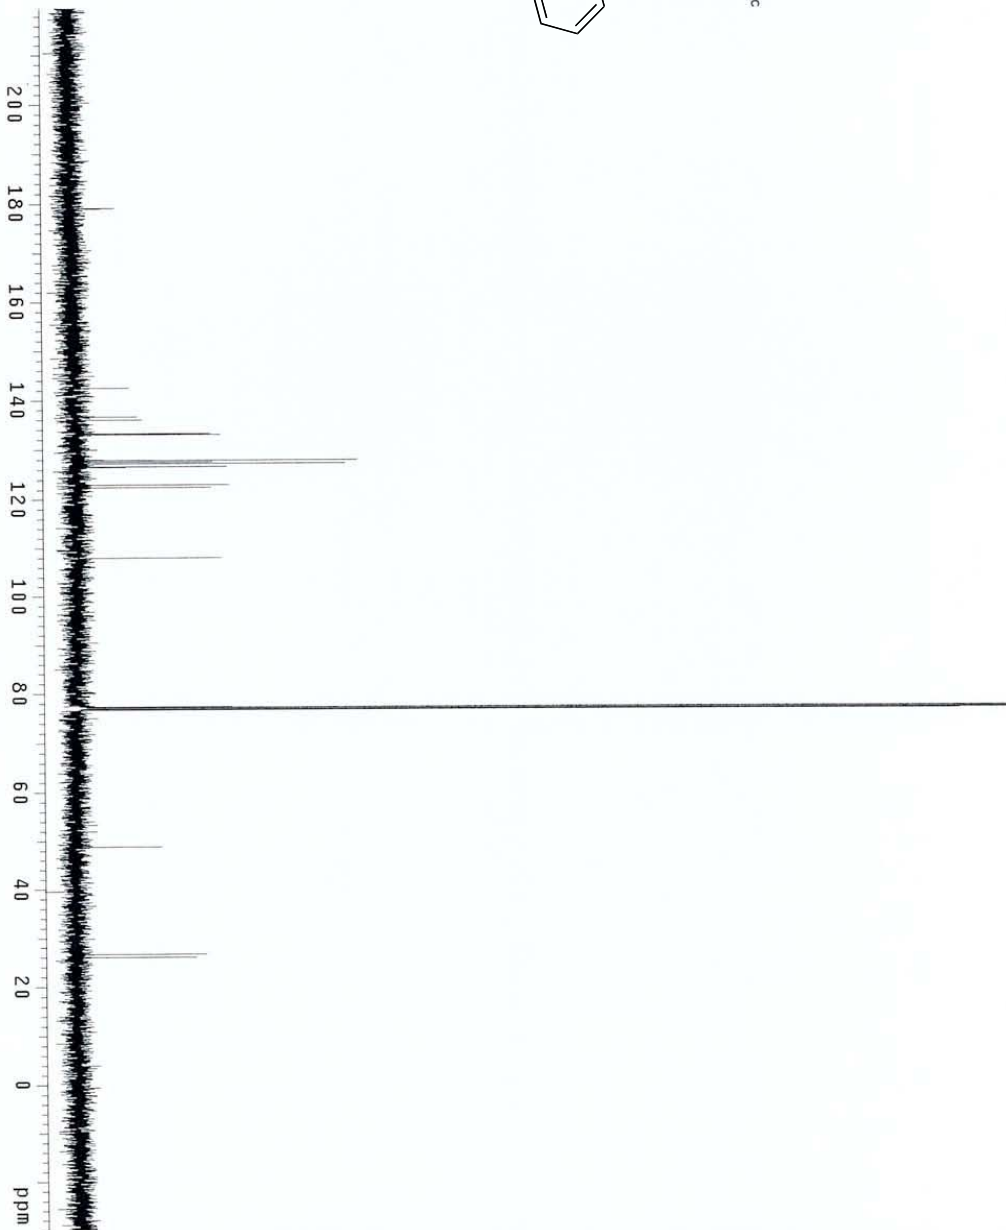



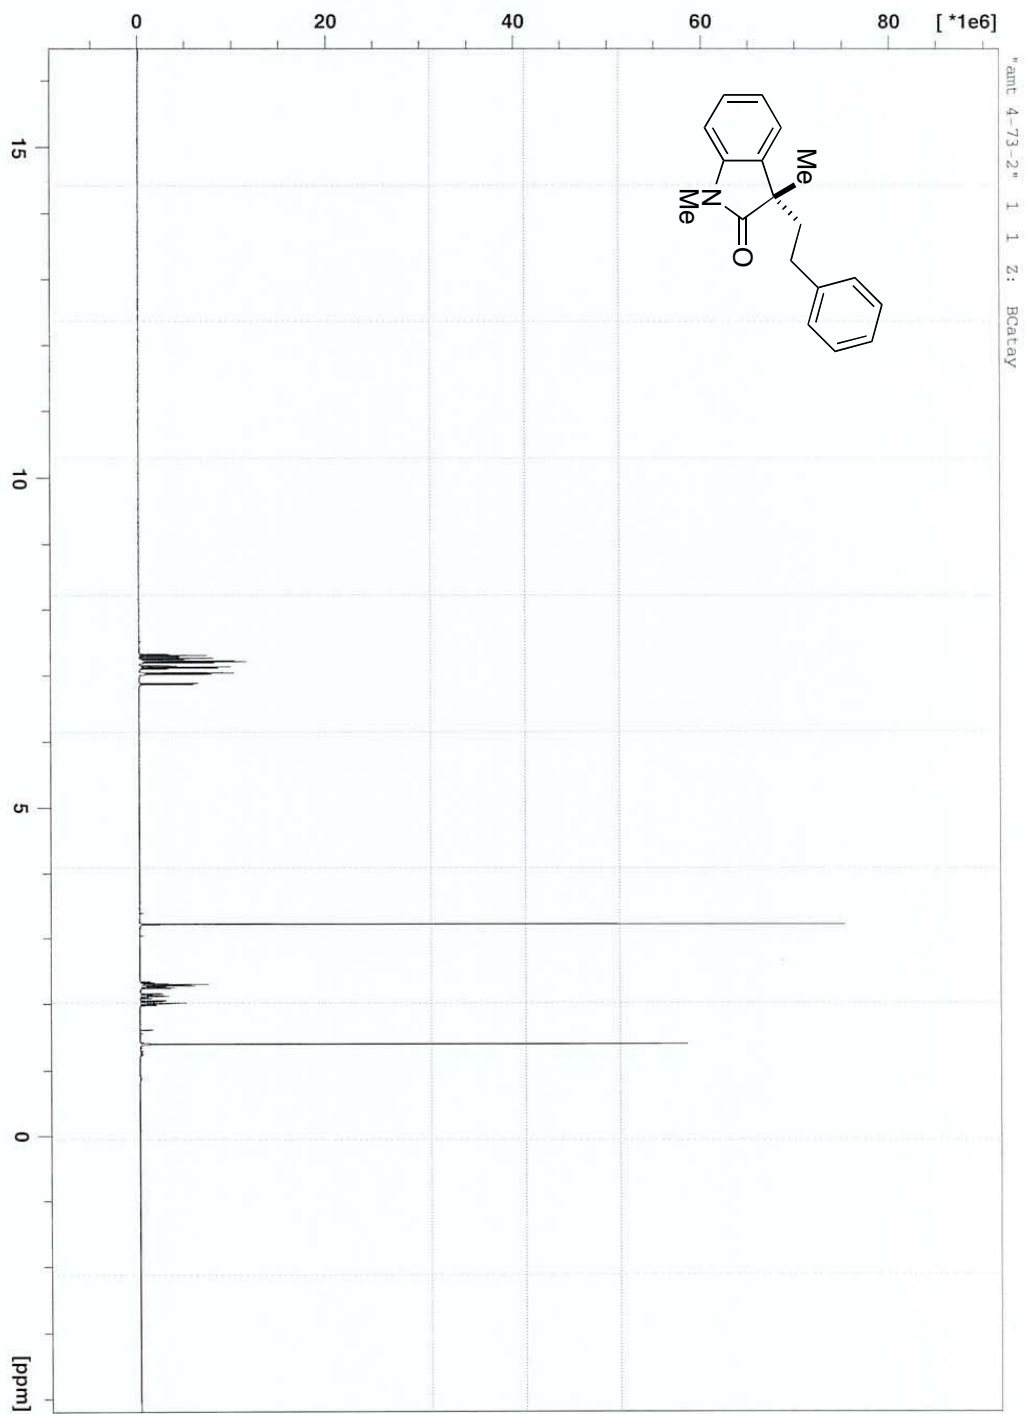

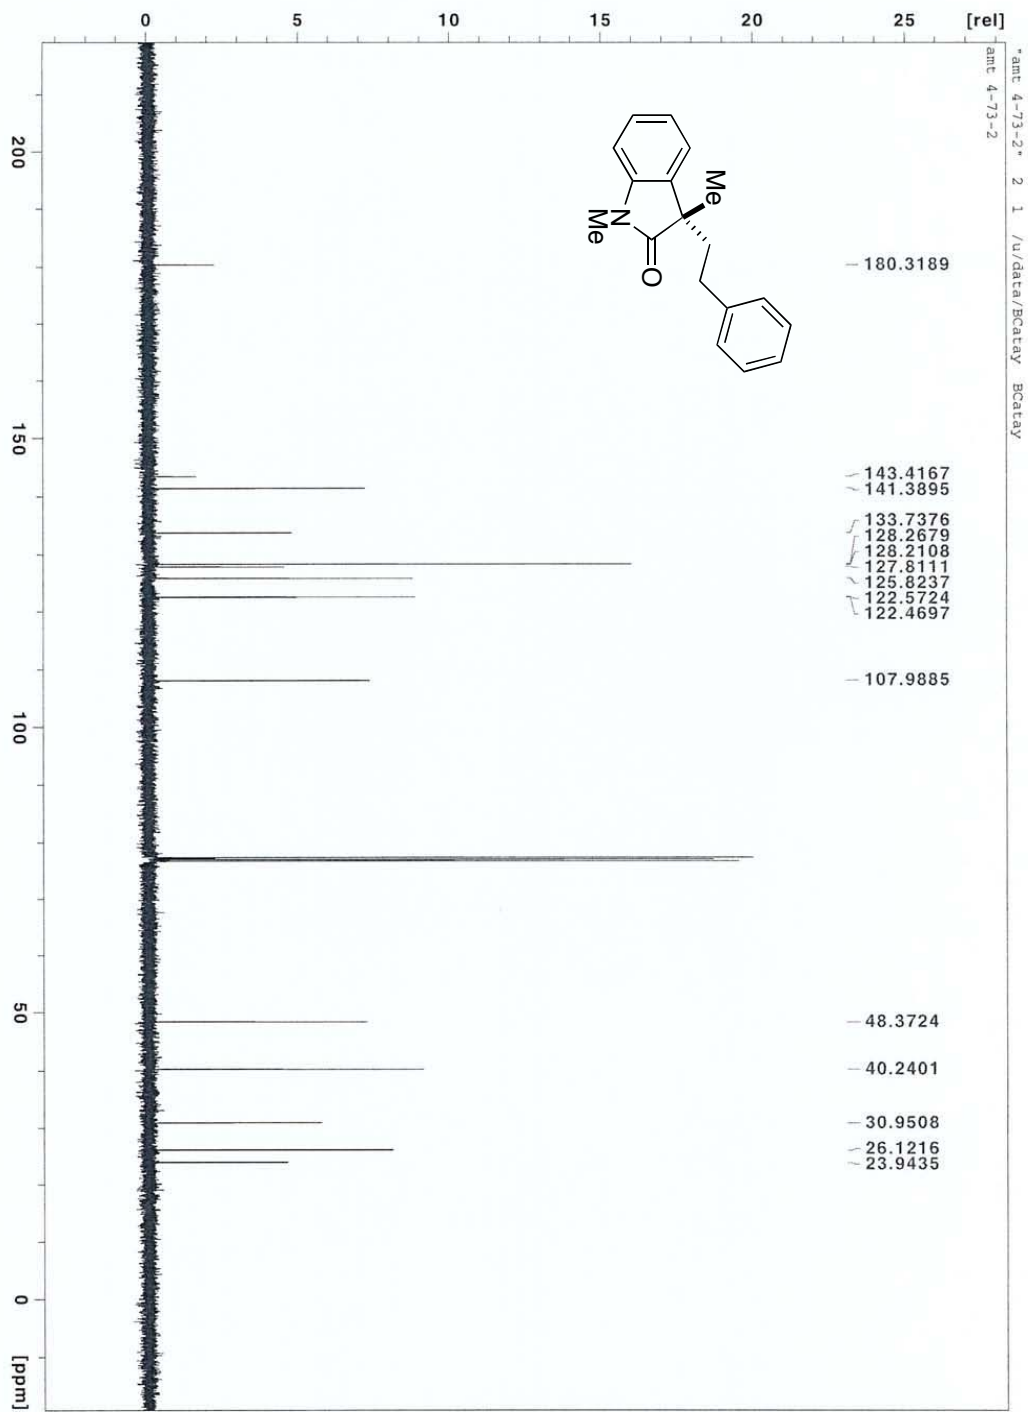

ami 4-698  
Pulse Sequence: s2pu1  
Solvent: CDCl3  
Ambient temperature  
INOVA-500 "bui1w1nk1e"  
Relax. delay 2.000 sec  
Pulse 88.7 degrees  
Acq. time 3.001 sec  
Width 10504.2 Hz  
18 repetitions  
OBSERVE H1, 499.7417198 MHz  
DATA PROCESSING  
FT size 26214  
Total time 1 min, 20 sec

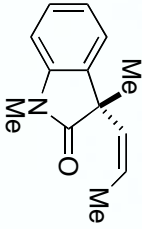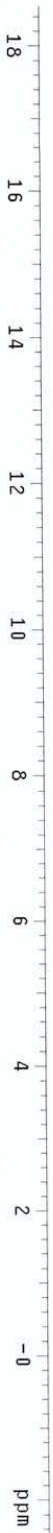

amt 4-698  
Pulse Sequence: s2pu1  
Solvent: CDCl3  
Ambient temperature  
User: 1-14-87  
INOVA-500 "bul1winkle"  
Relax. delay 3.000 sec  
Pulse 33.6 degrees  
Acq. time 2.000 sec  
Width 31397.2 Hz  
128 repetitions  
OBSERVE C13, 125.6601718 MHz  
DECOUPLE H1, 499.7442194 MHz  
Power 34 dB  
SOLVENT MODULATED  
WALTZ-16 modulated  
DATA PROCESSING  
Line broadening 1.0 Hz  
FT size 131072  
Total time 10 min, 41 sec

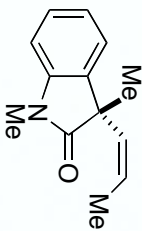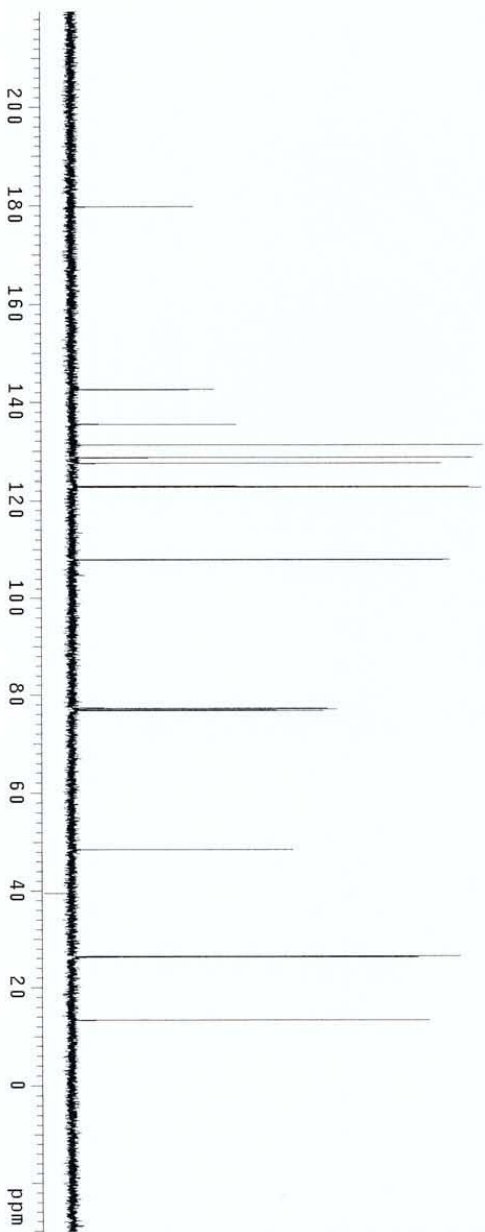

amt 4-693C  
Pulse Sequence: s2pul  
Solvent: CDCl3  
Ambient Temperature  
INOVA-500 "bui1wink1e"  
Relax. delay 2.000 sec  
Pulse 88.7 degrees  
Acq. time 3.001 sec  
Width 10504.2 Hz  
16 repetitions  
OBSERVE H1, 499.7417206 MHz  
DATA PROCESSING  
FT size 262144  
Total time 1 min, 20 sec

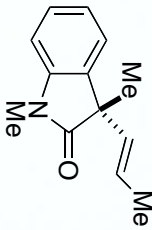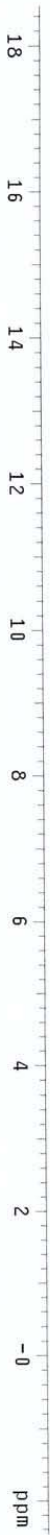

amt 4-69C  
Pulse Sequence: s2pu1  
Solvent: CDCl3  
Ambient temperature  
User: I-14-87  
INOVA-500 "but1winkle"  
Relax. delay 3.000 sec  
Pulse 33.6 degrees  
Acq. time 2.000 sec  
Width 31397.2 Hz  
80 repetitions  
OBSERVE C13, 125.6601723 MHz  
DECUPLE H1, 499.7442194 MHz  
Power 34 db  
P1 1.000 sec  
WALTZ-16 modulated  
DATA PROCESSING  
Line broadening 1.0 Hz  
FT size 131072  
Total time 10 min, 41 sec

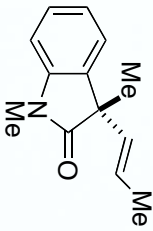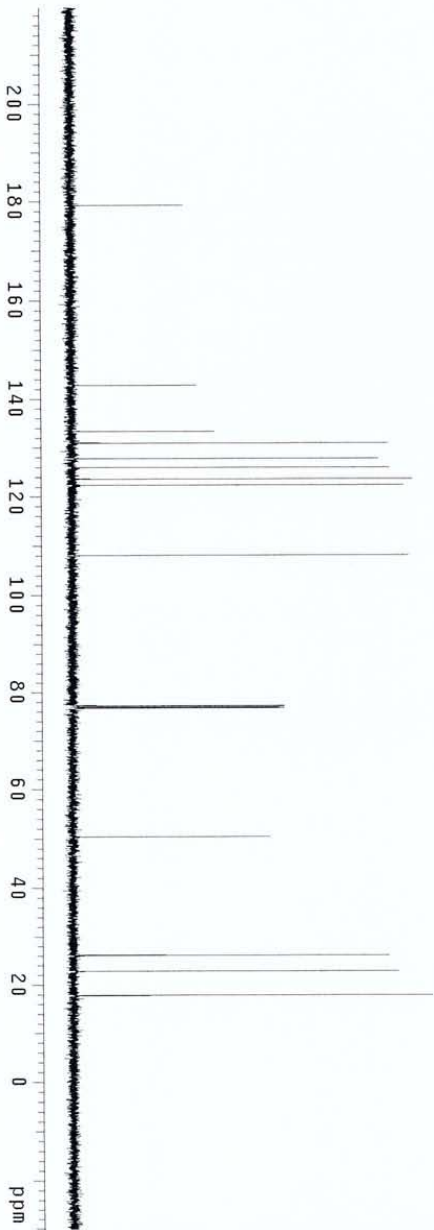

amt 4-69D  
Pulse Sequence: s2pul  
Solvent: CDCl3  
Ambient temperature  
INOVA-500 "pu11wink1e"  
Relax. delay 2.000 sec  
Pulse 88.7 degrees  
Acq. time 3.001 sec  
Width 10504.2 Hz  
16 repetitions  
OBSERVE H1: 499.7417227 MHz  
DATA PROCESSING  
F1 size 262194  
Total time 1 min, 20 sec

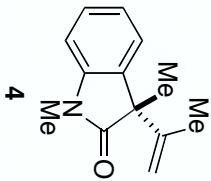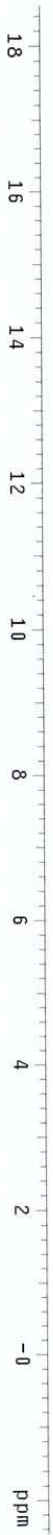

amt\_4-69D-2  
Pulse Sequence: szpul  
Solvent: CDCl3  
Ambient Temperature  
User: 1-14-87  
INOVA-500 "bun1lwinkle"  
Relax. delay 3.000 sec  
Pulse 33.6 degrees  
Acq. time 2.000 sec  
Width 31397.2 Hz  
80 Repetitions  
OBSERVE C13, 125.6601684 MHz  
DECUPLE H1, 499.742194 MHz  
Power 34 dB  
PMT unused, on  
WATZING undulated  
DATA PROCESSING  
Line broadening 1.0 Hz  
F1 size 131072  
Total time 10 min., 41 sec

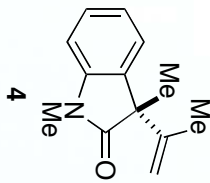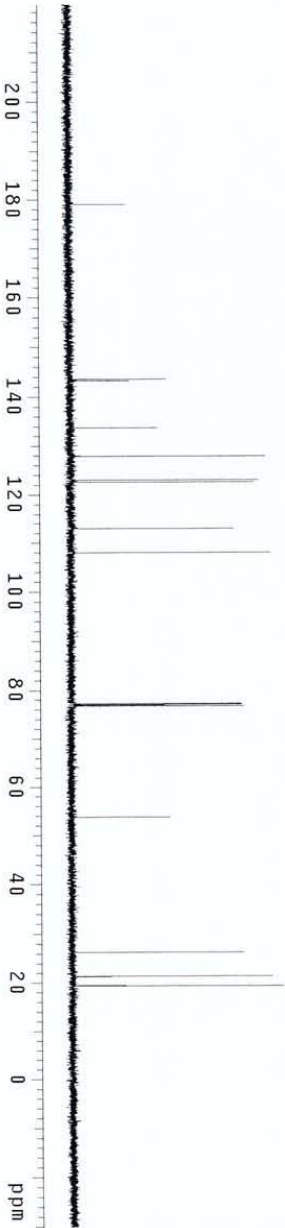



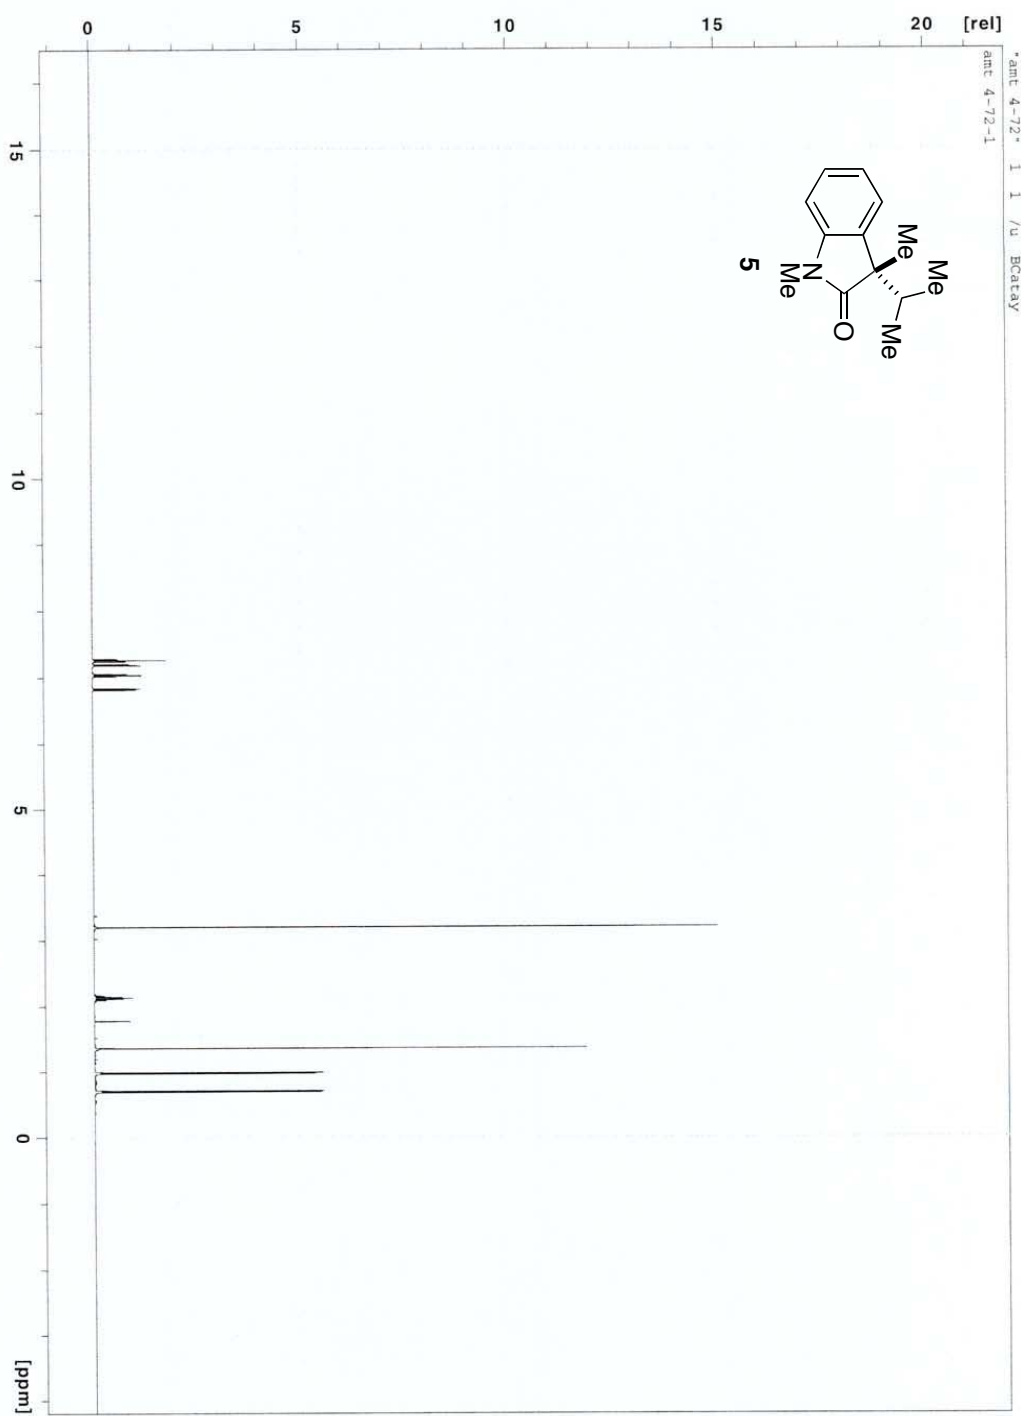

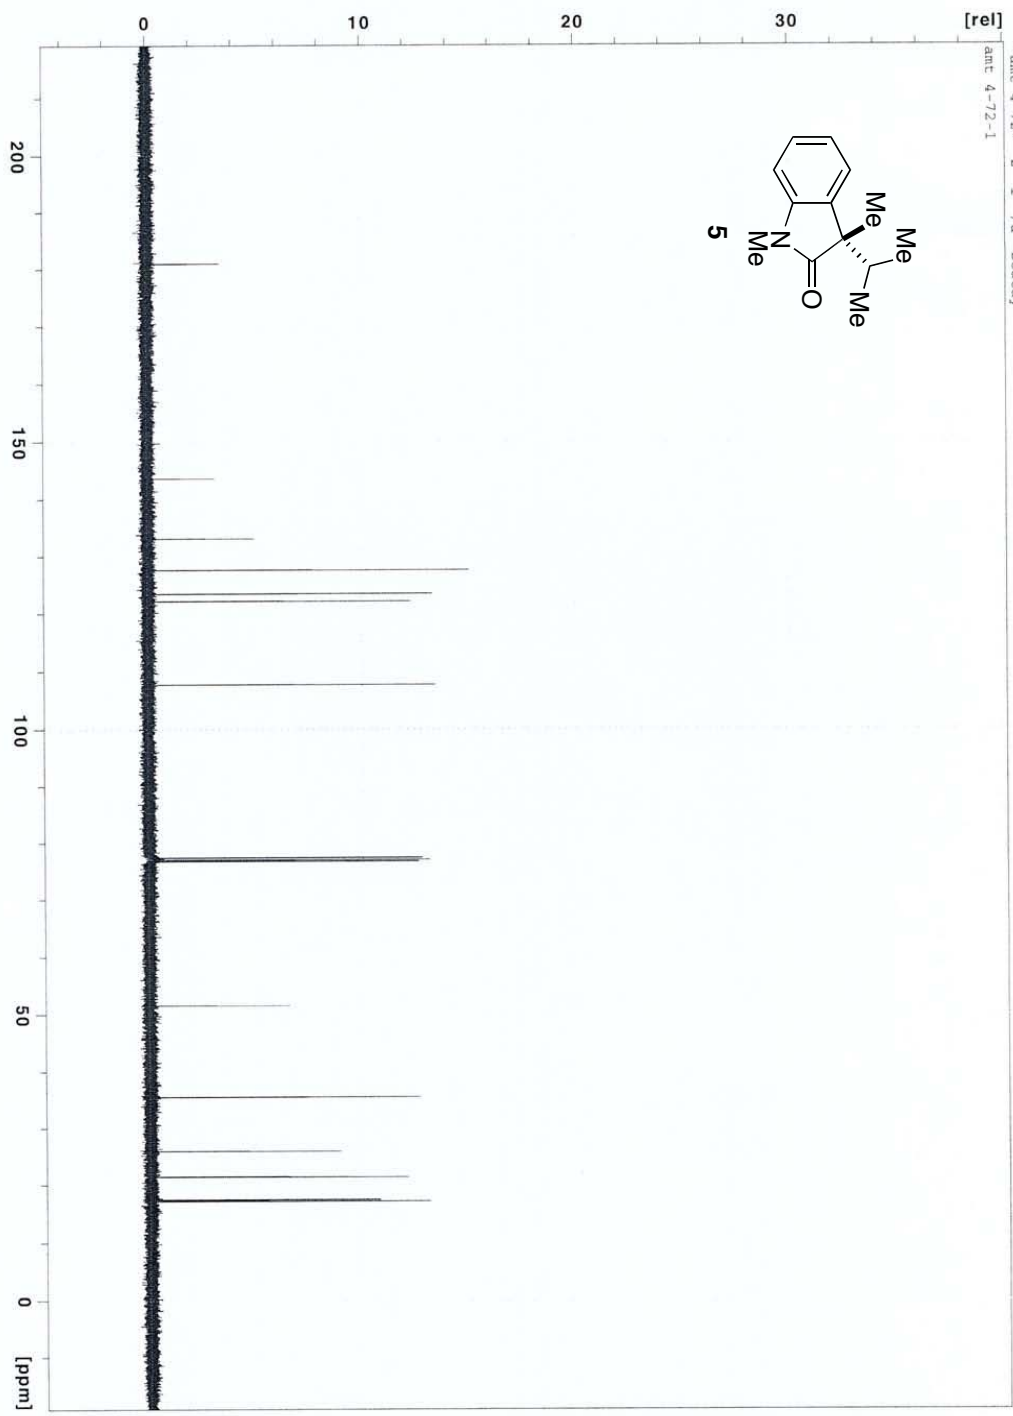

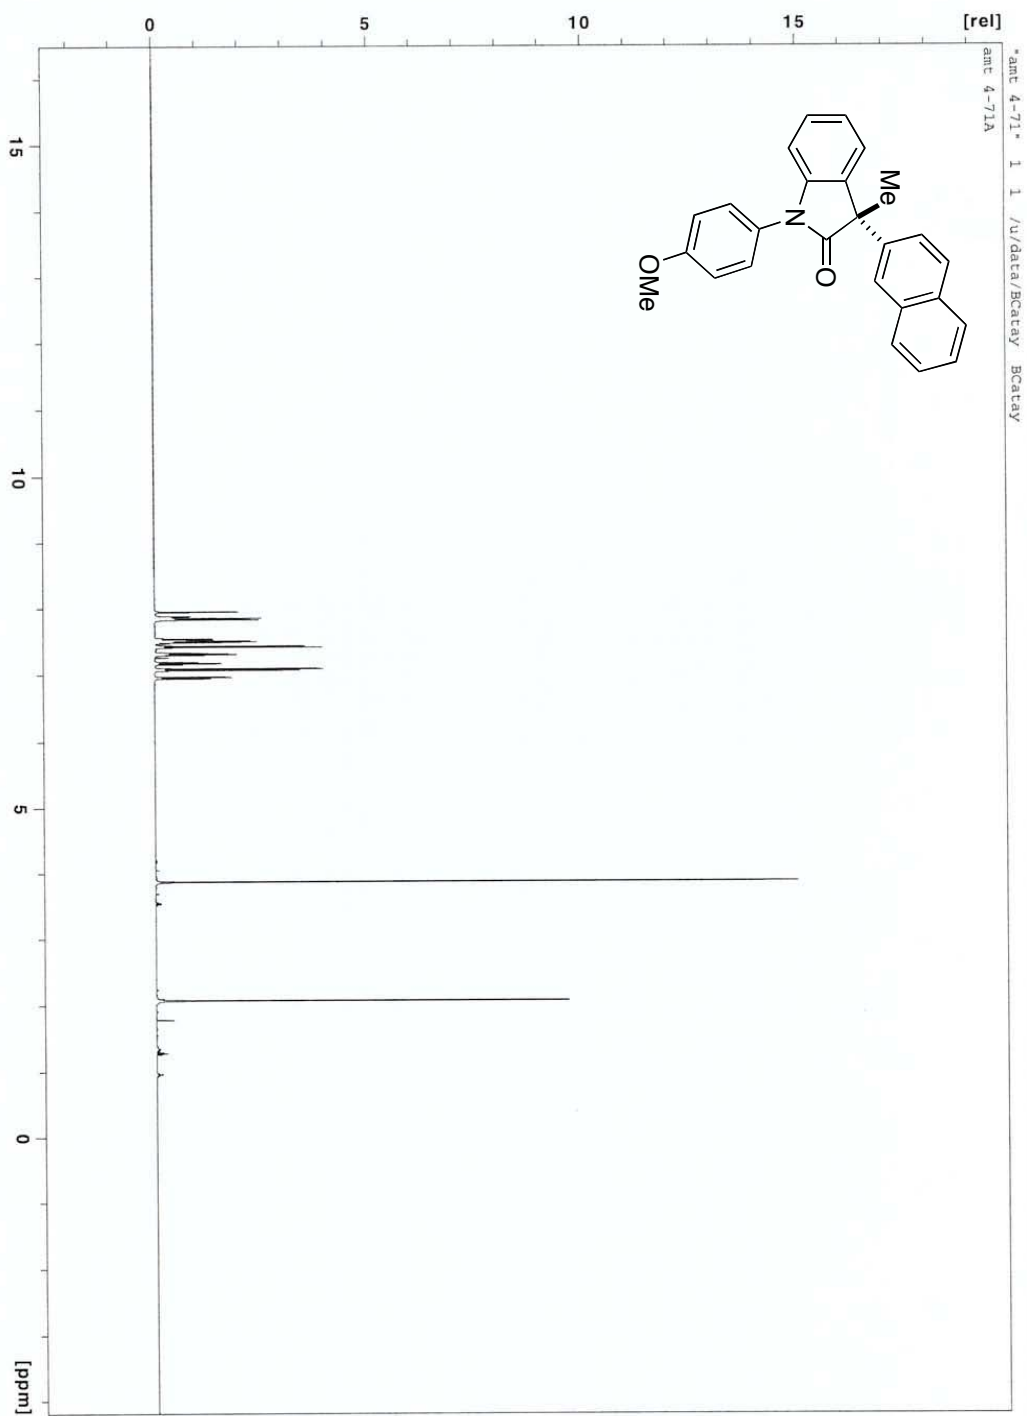

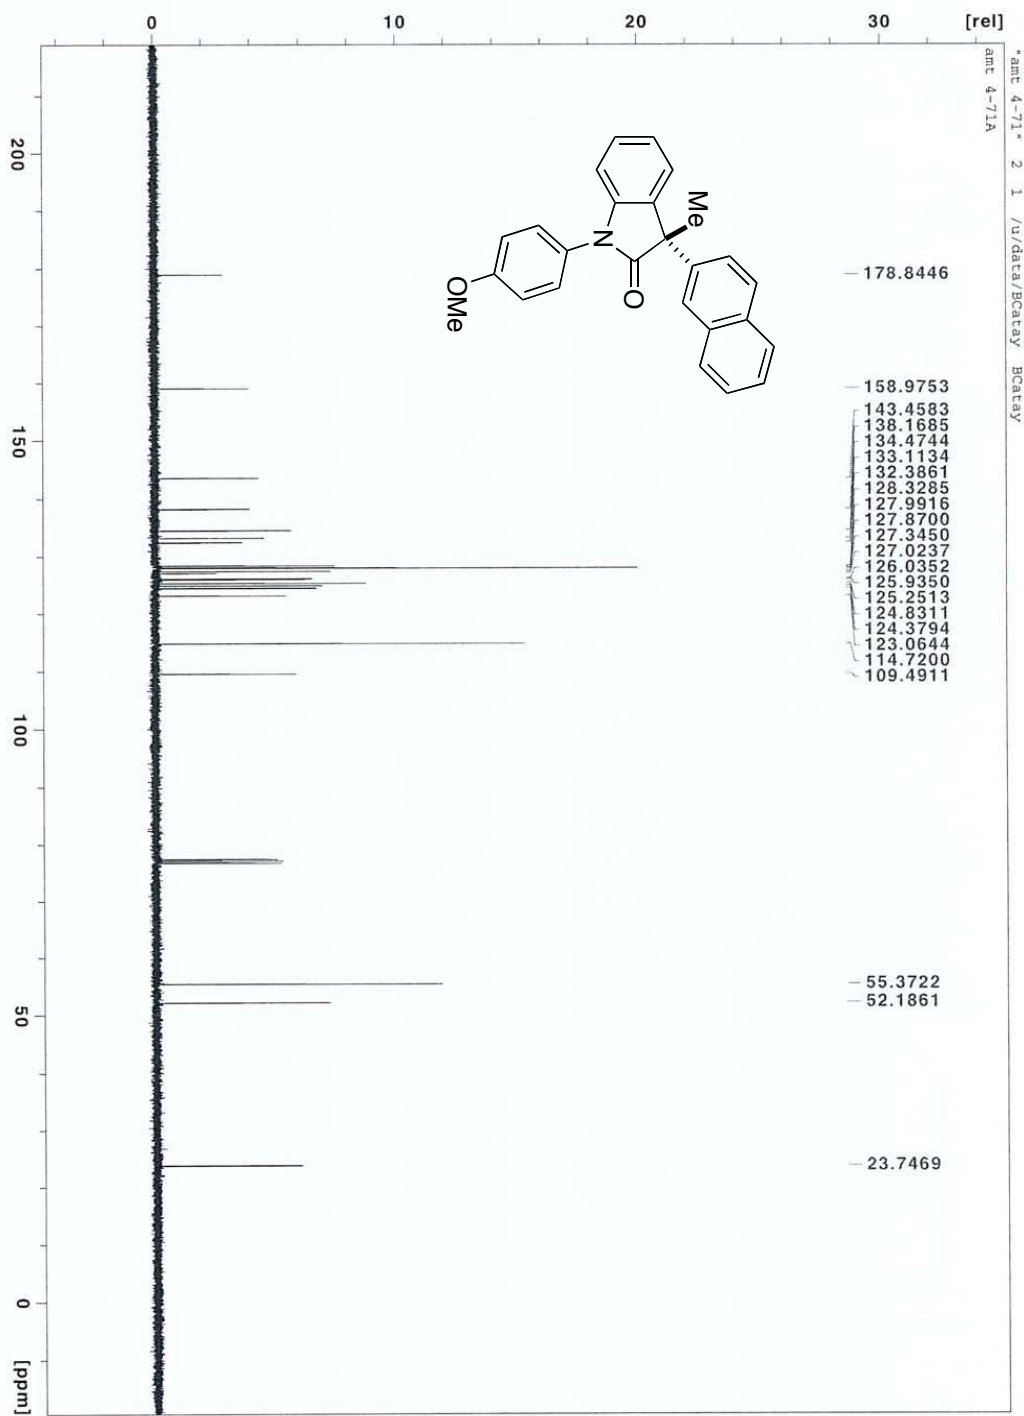



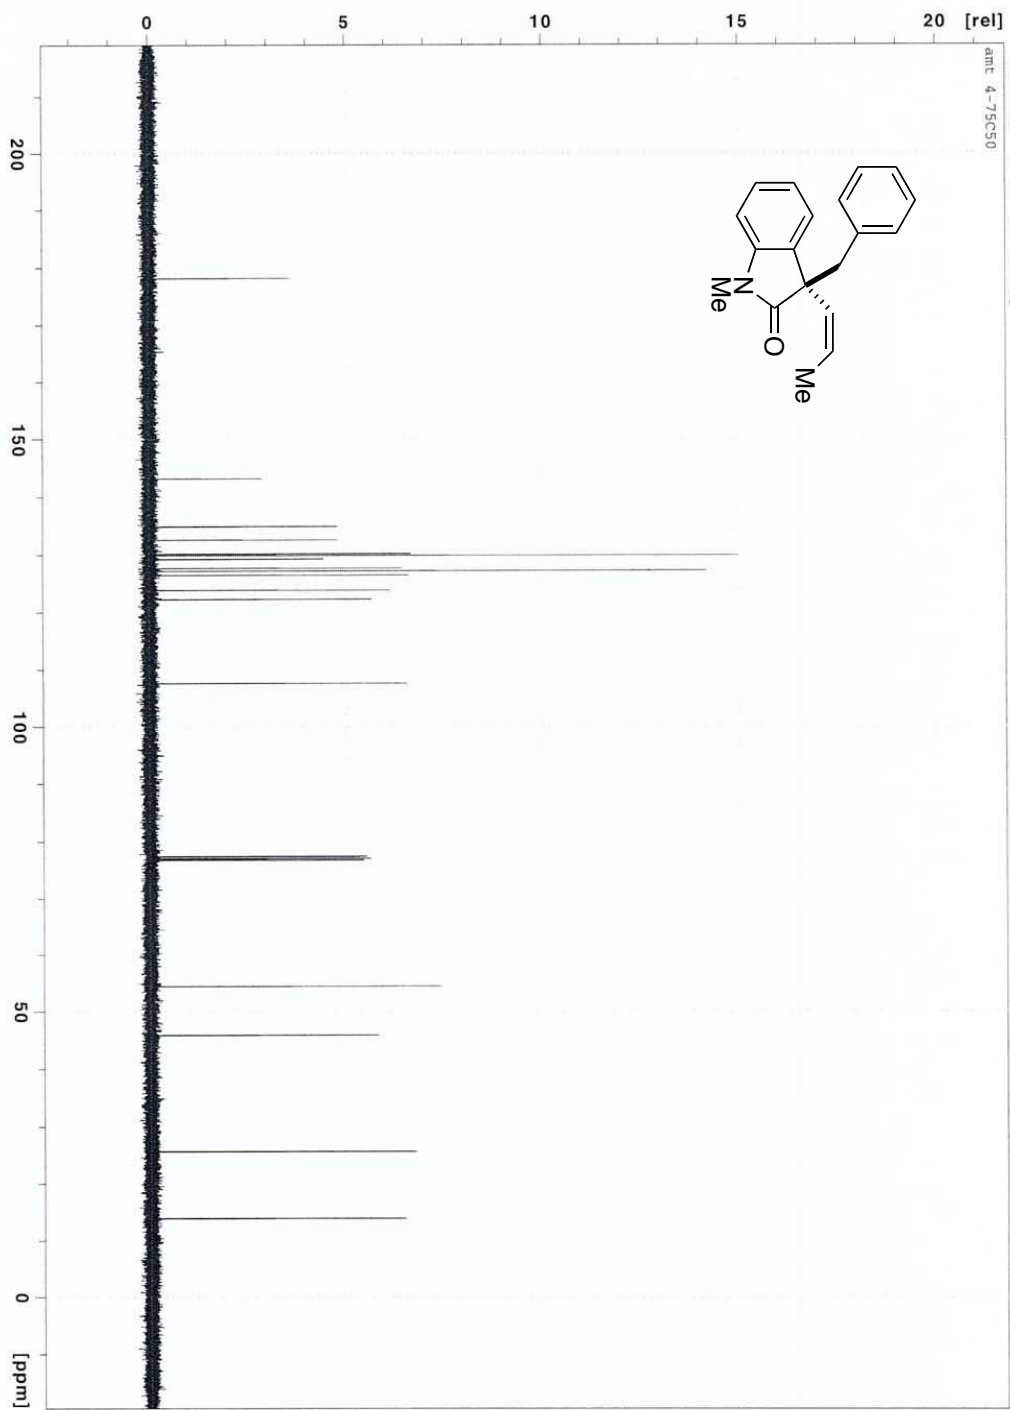

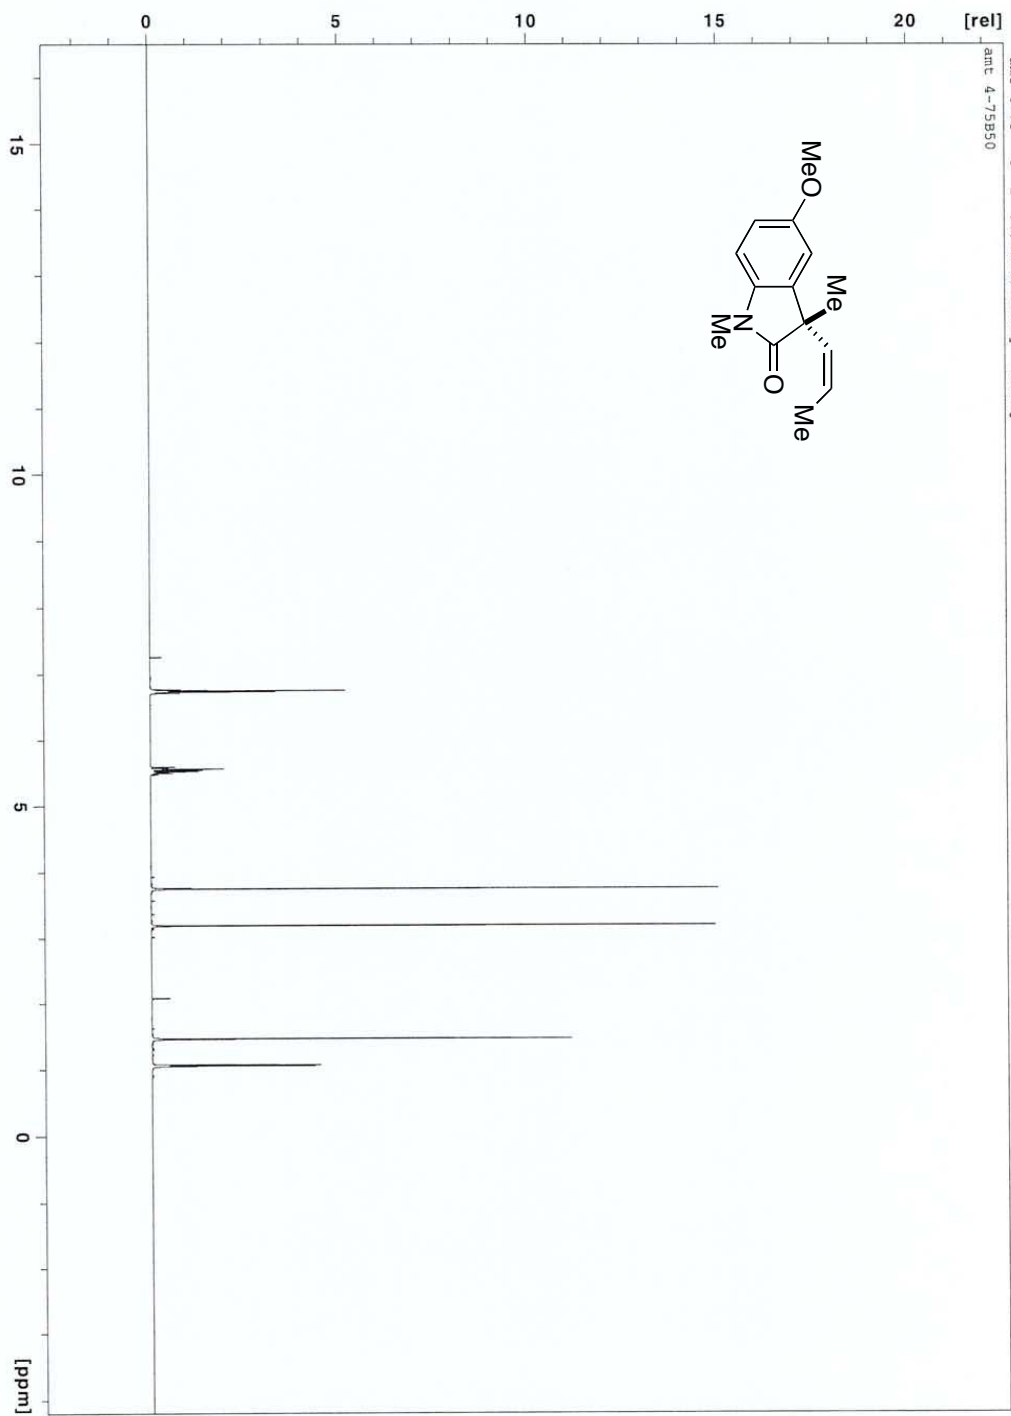

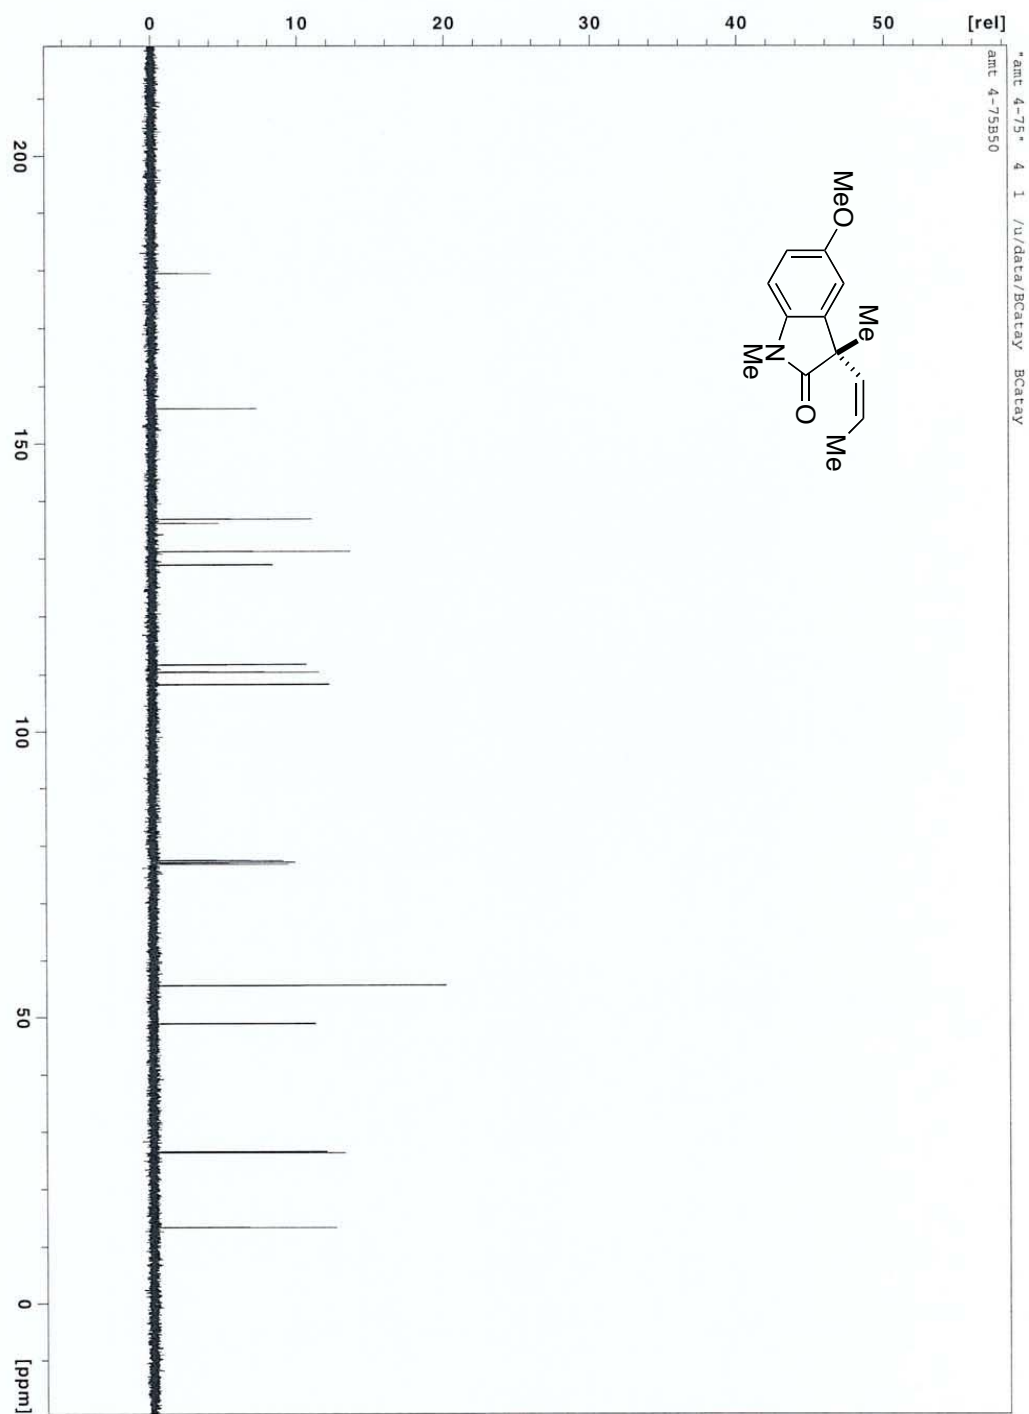



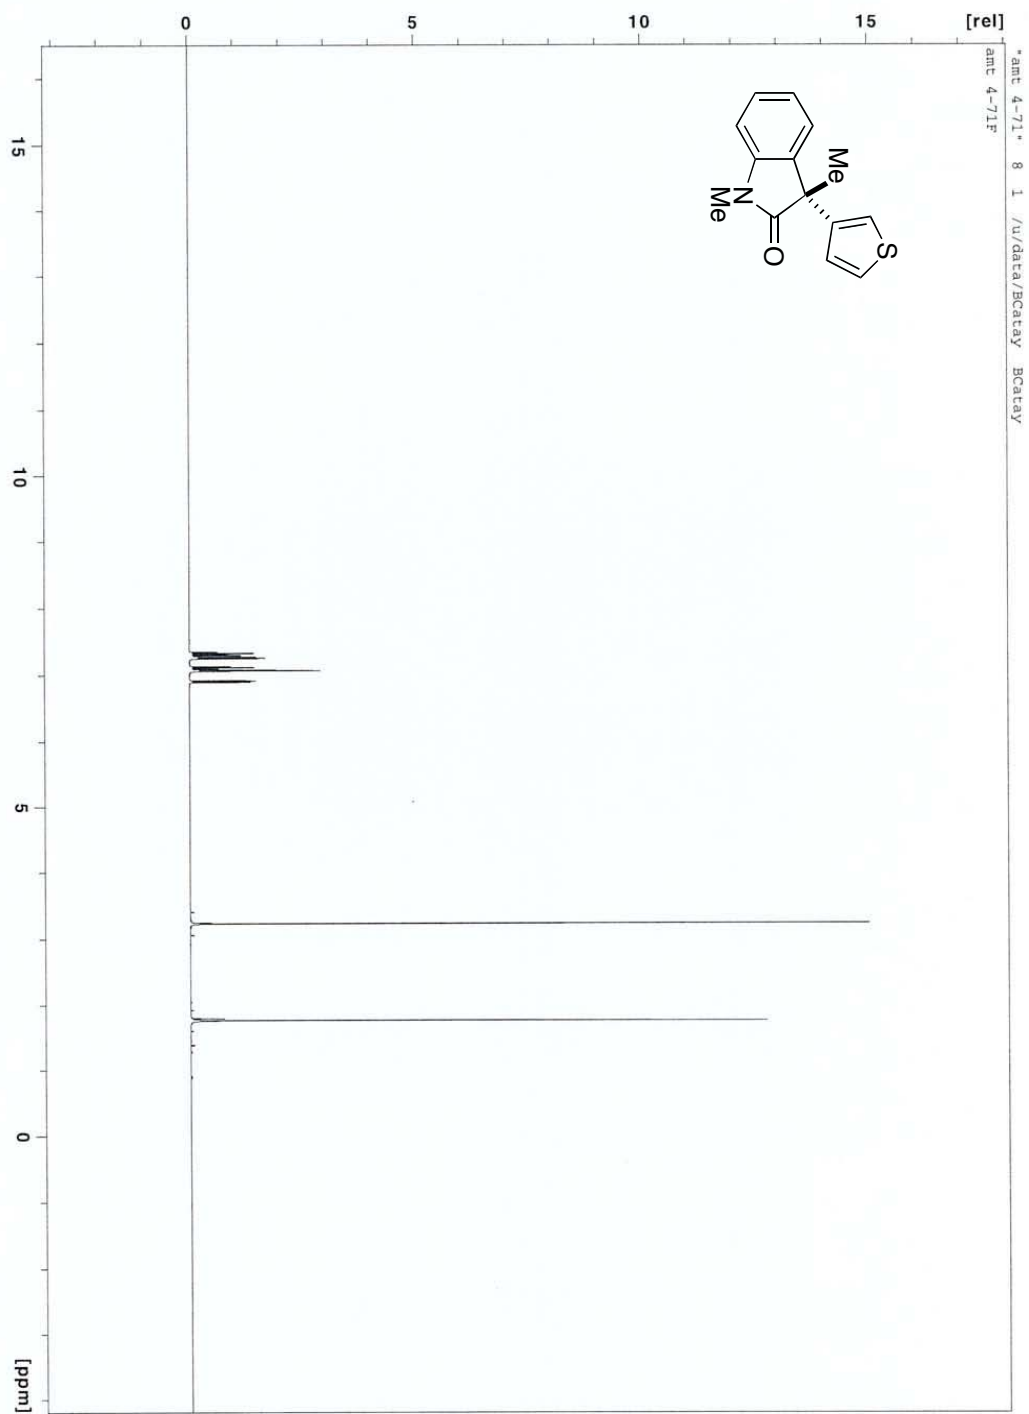

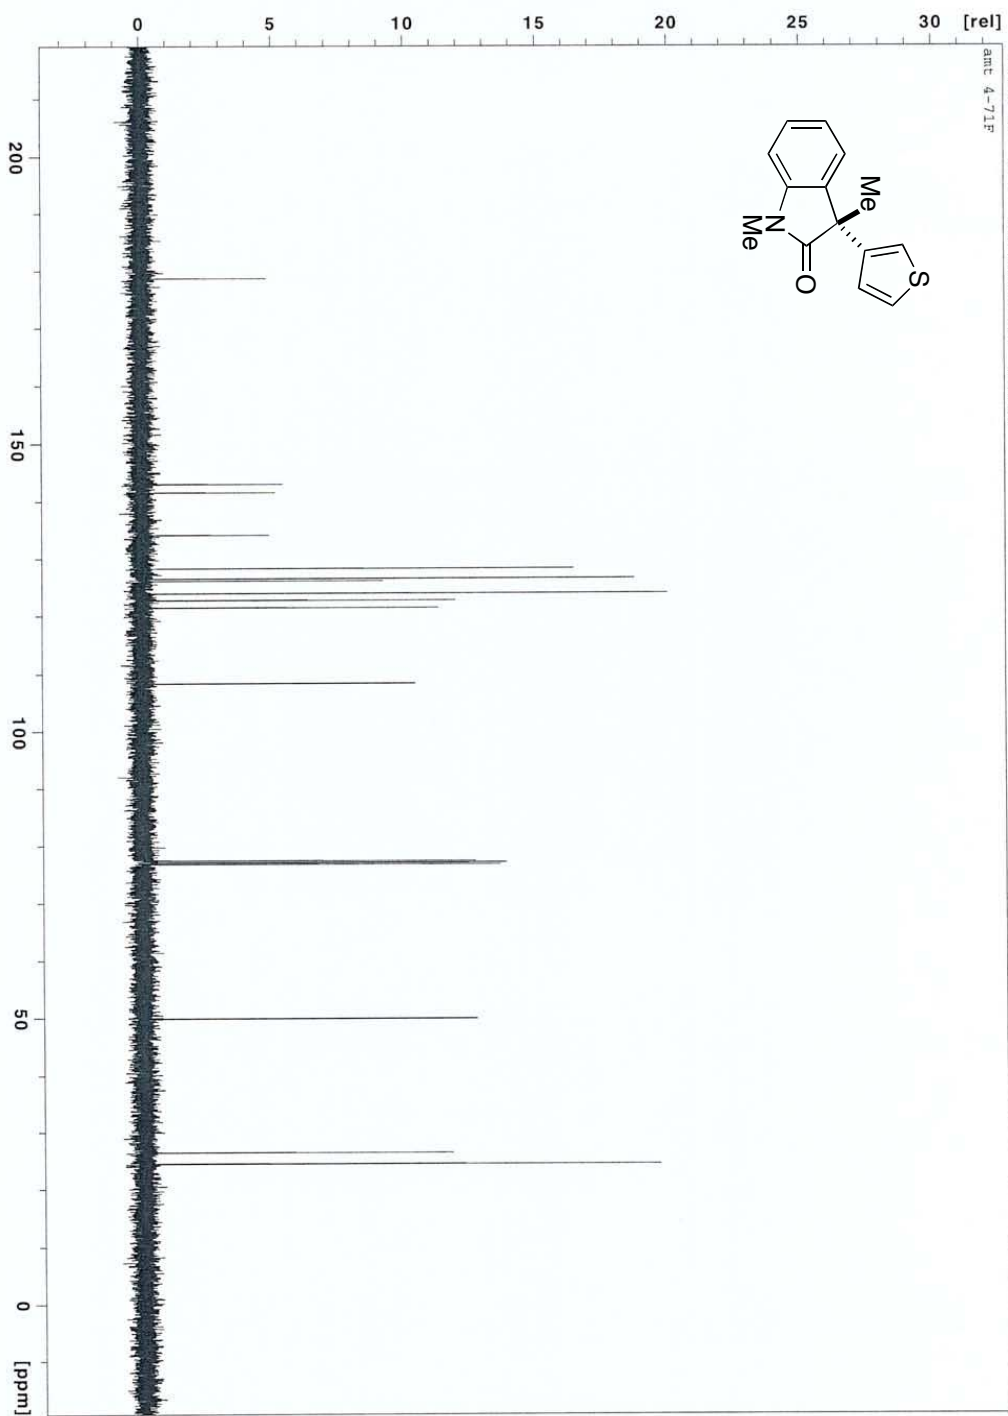

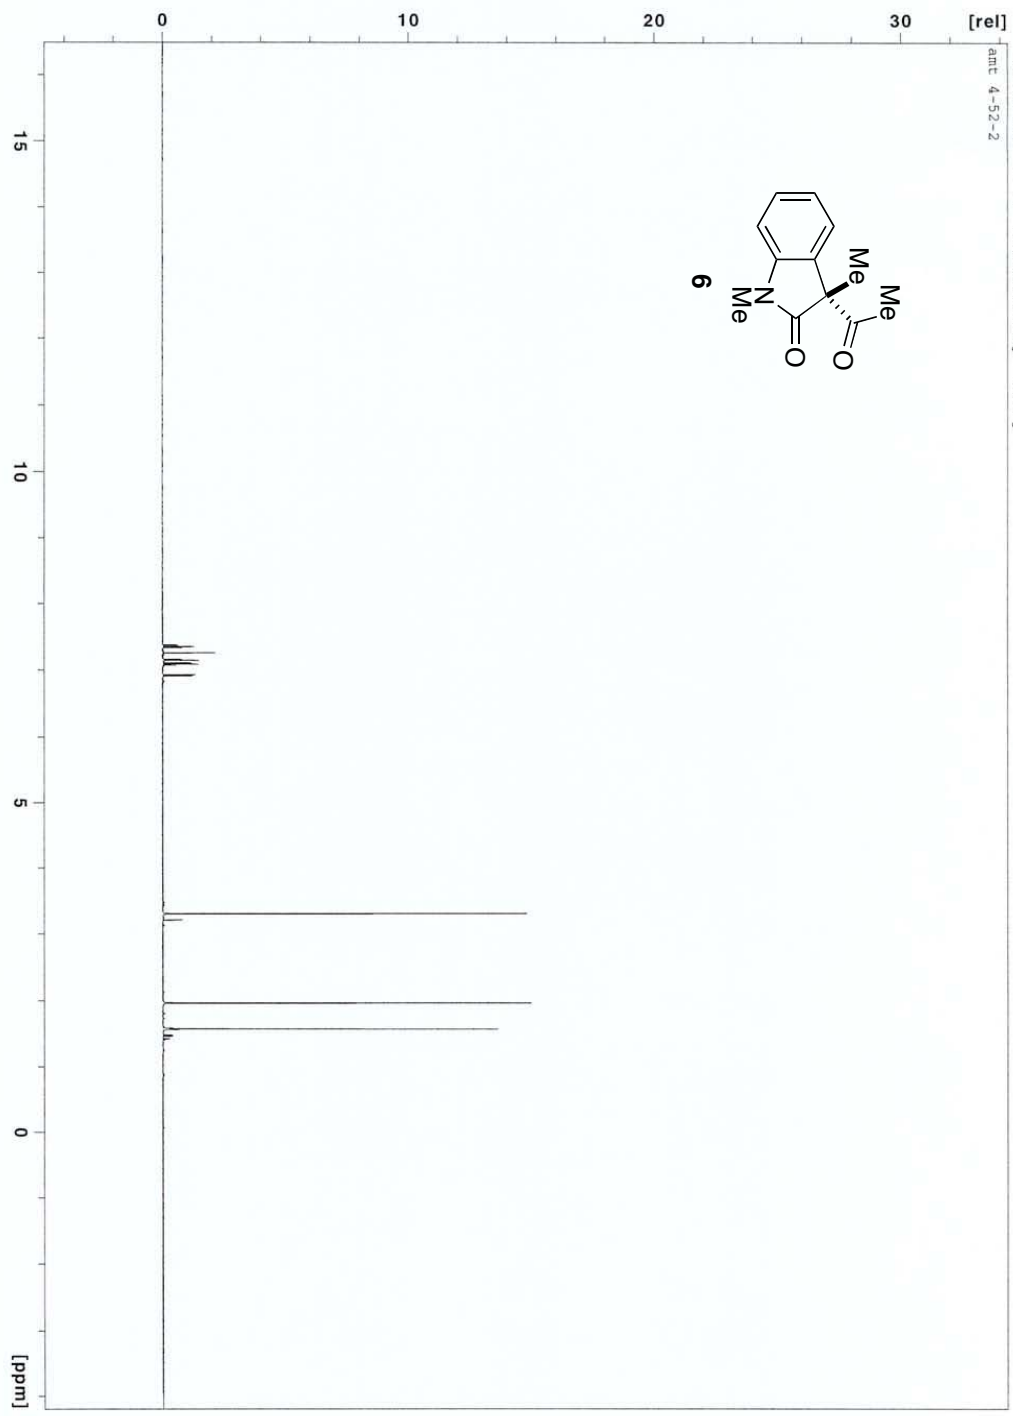

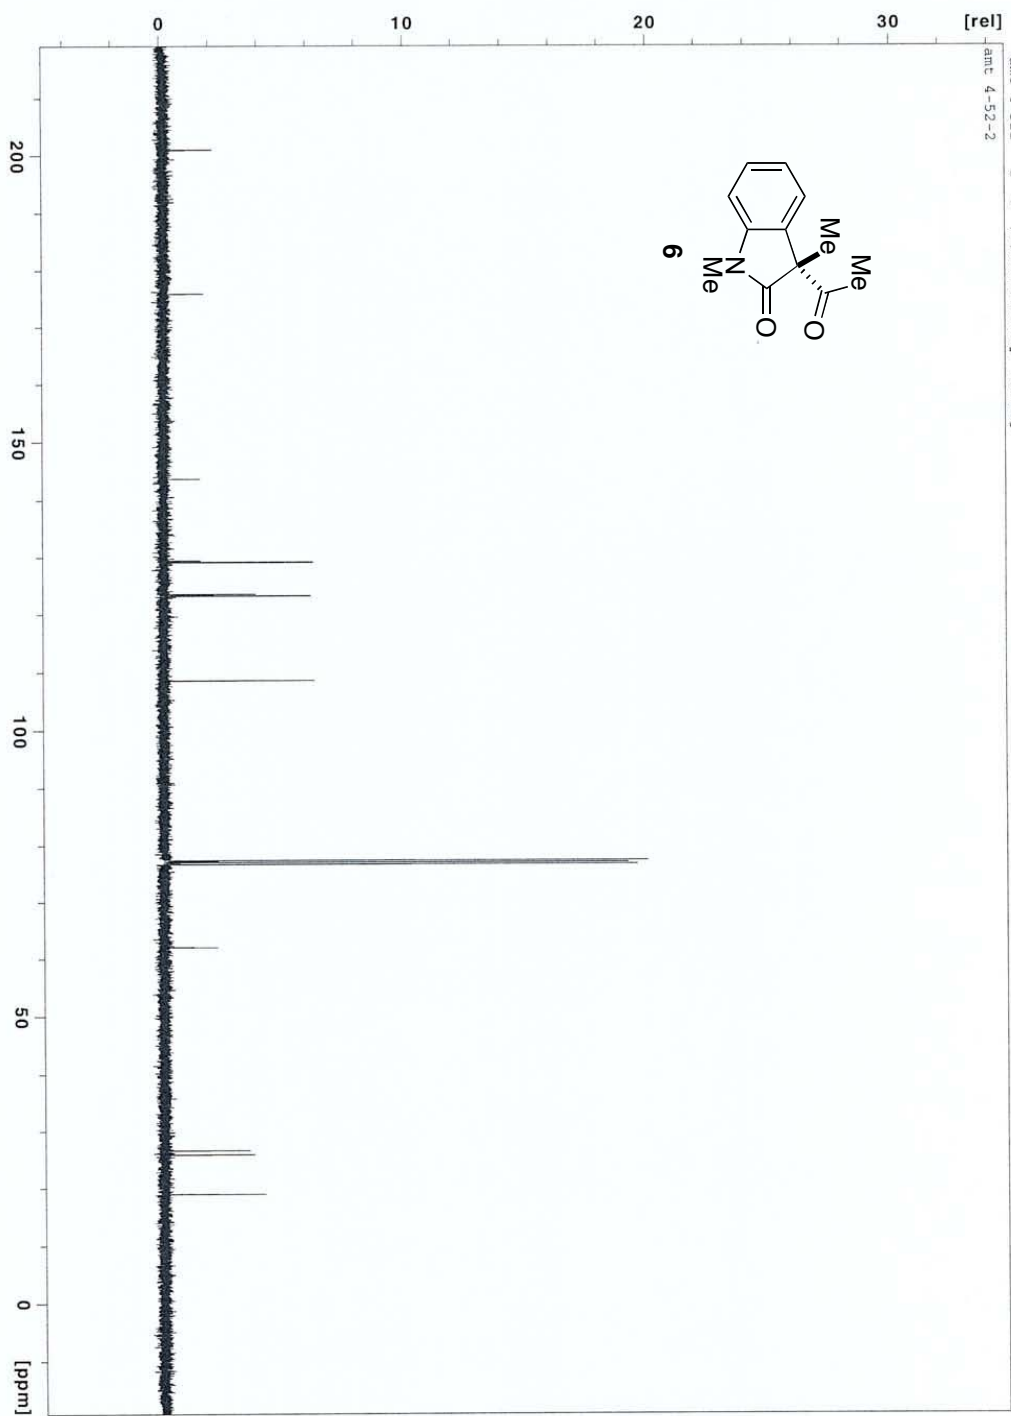

amt 4-63  
Pulse Sequence: s2pul  
Solvent: CDCl3  
Acq. temperature  
INDVA-500 "DUIWINK1e"  
Relax. delay 2.000 sec  
Pulse 88.7 degrees  
Acq. time 3.901 sec  
A/D 10391.4 Hz  
15 DELT 1.03914 sec  
OBSERVE F1 499.7417206 MHz  
DATA PROCESSING  
FT size 262144  
Total time 1 min., 20 sec

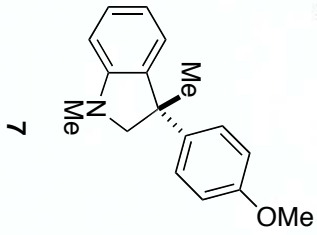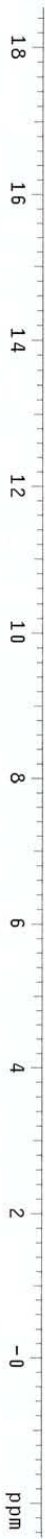

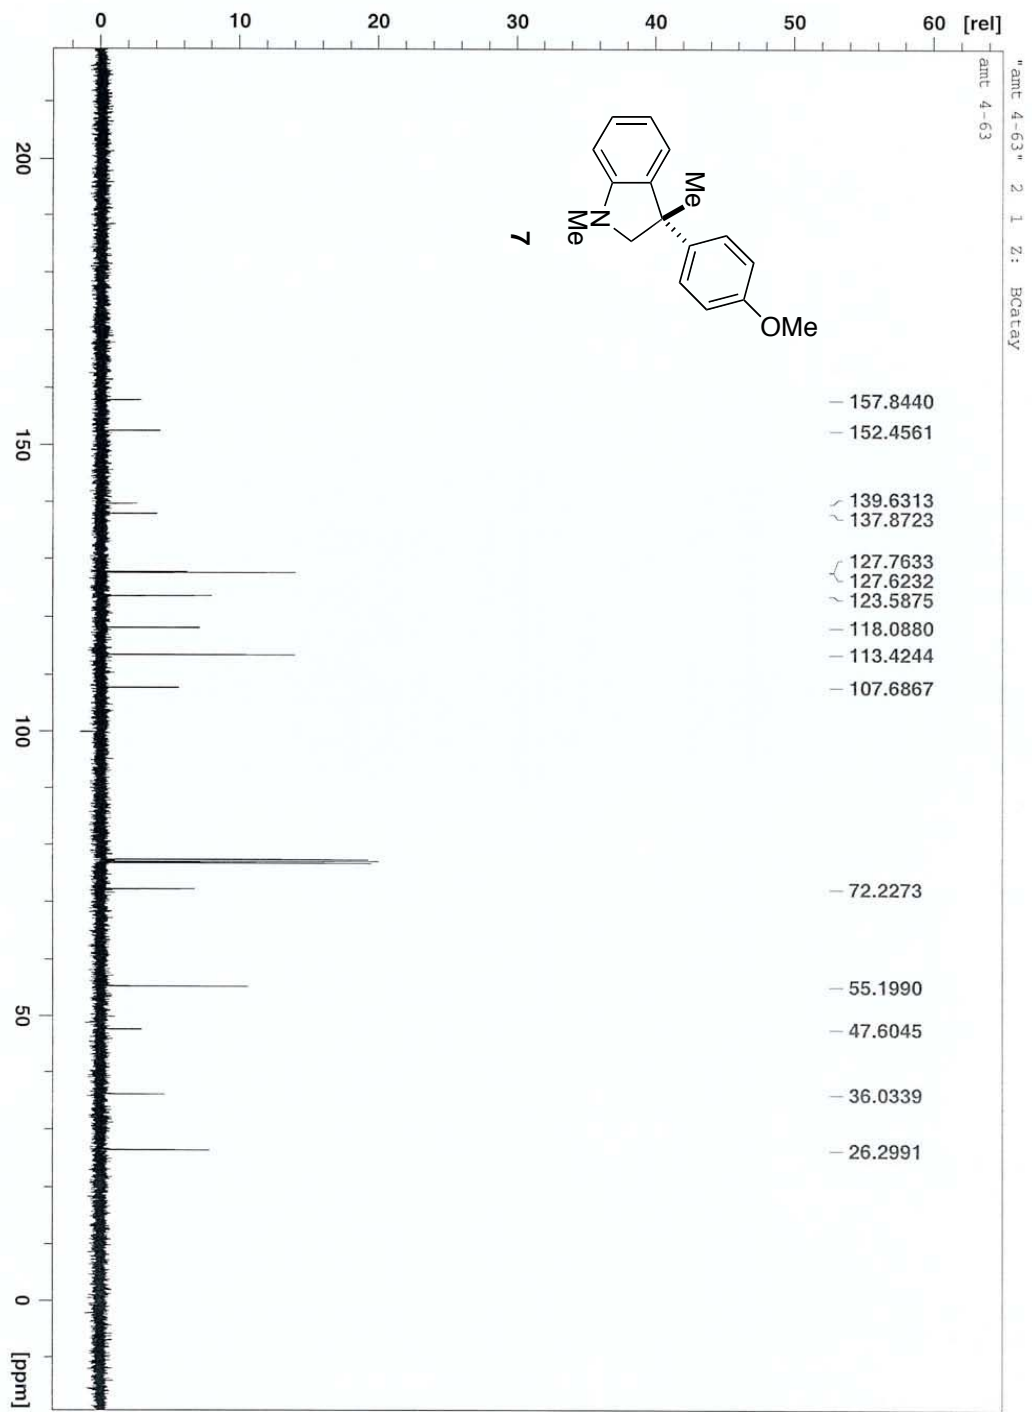

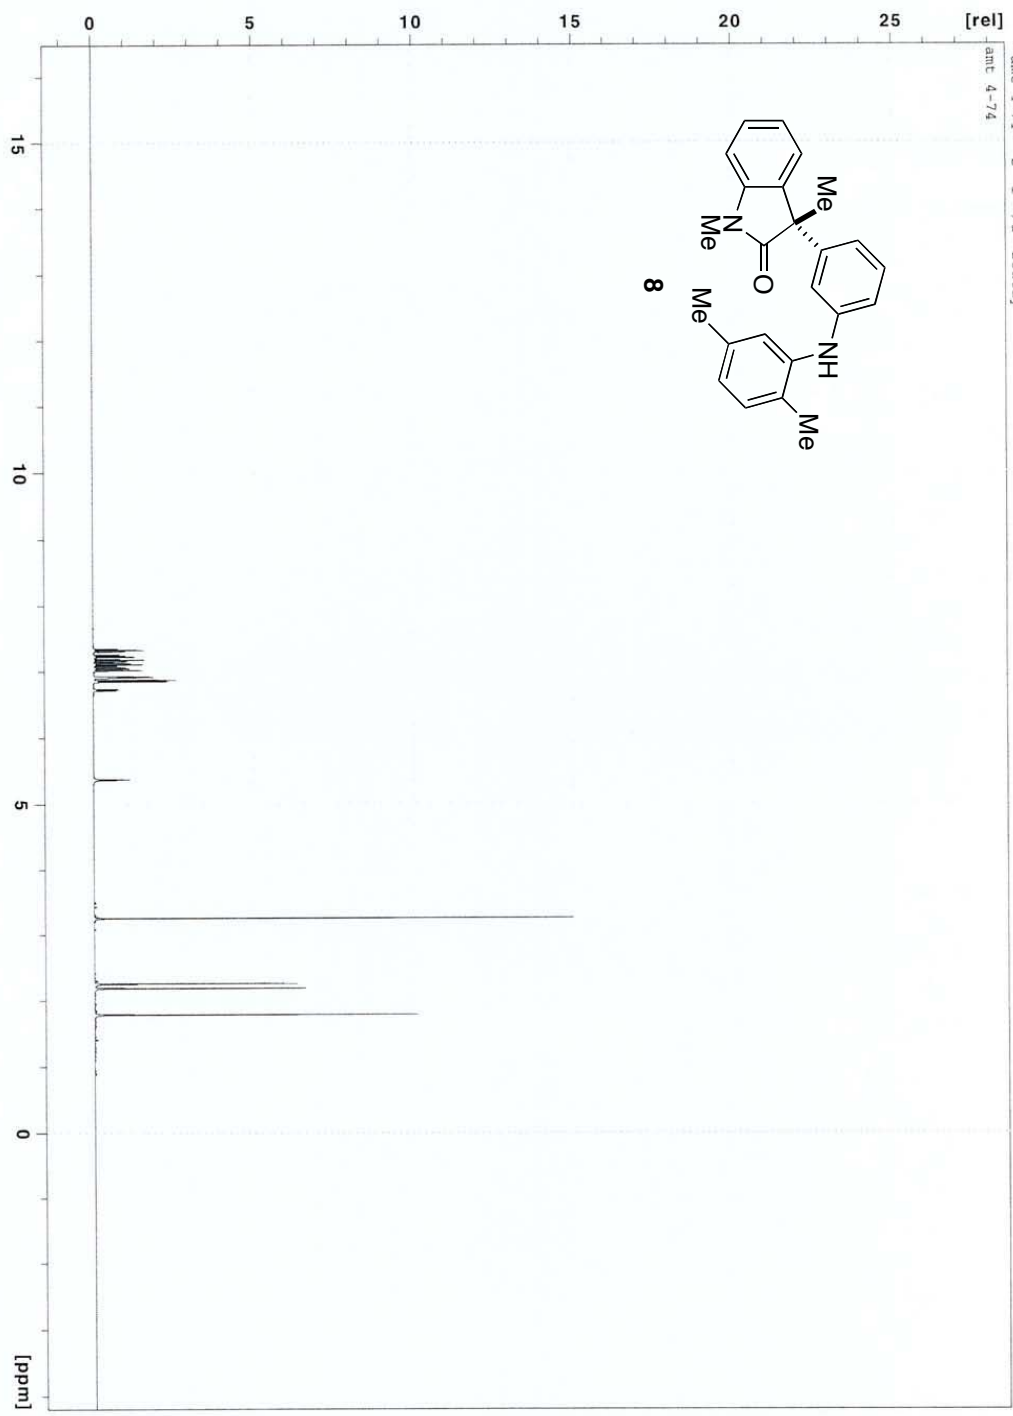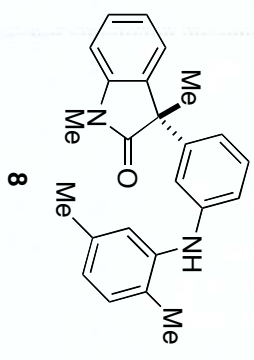

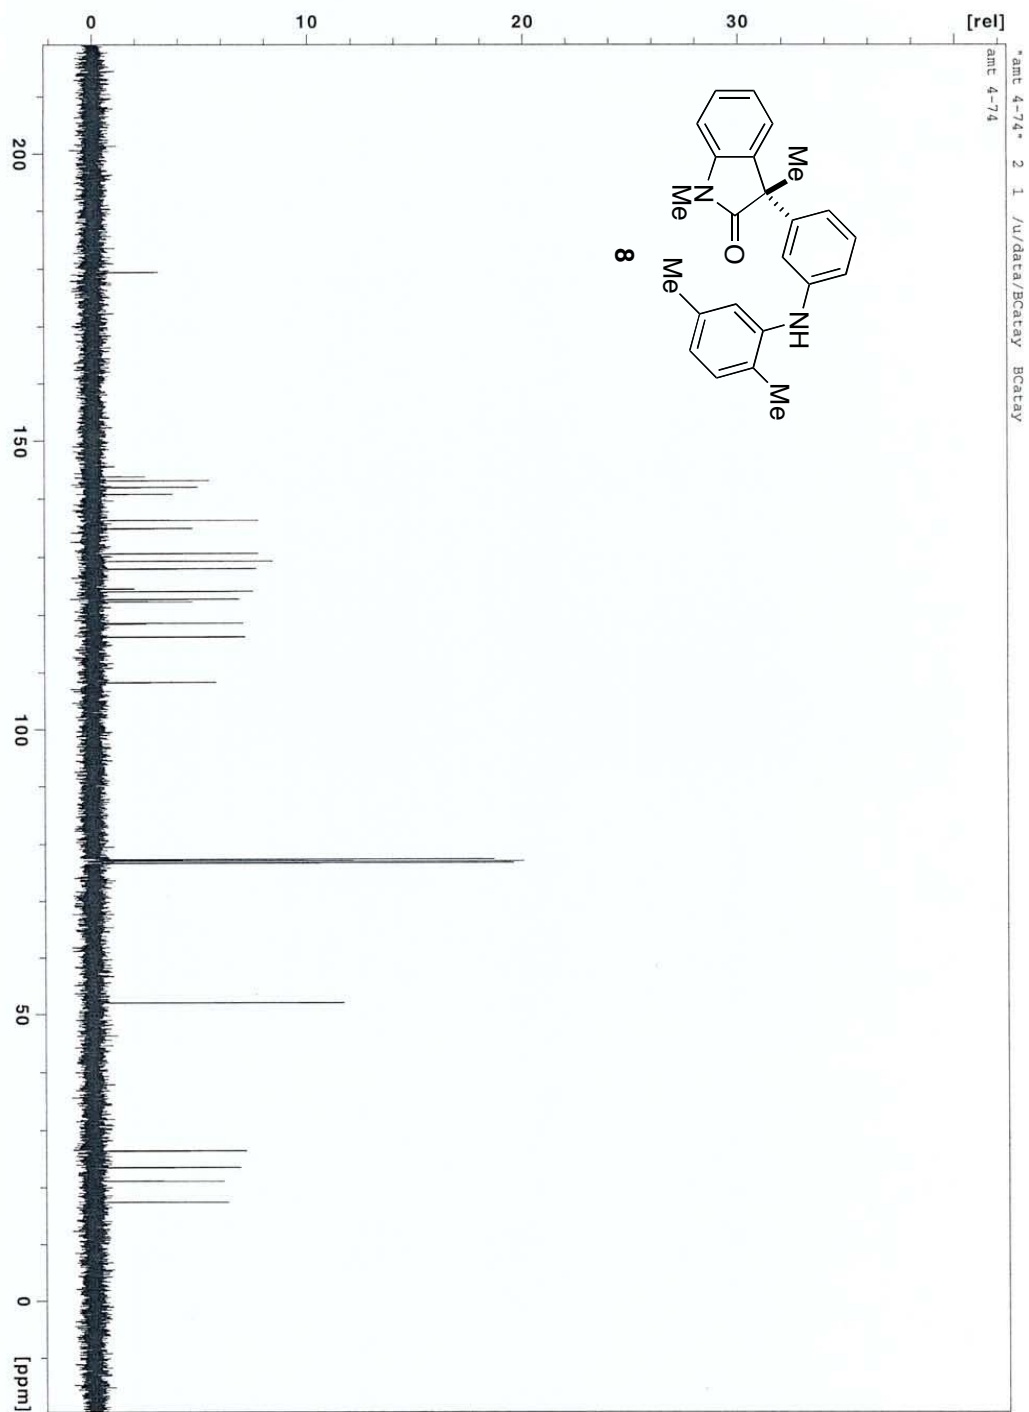

Supplement: NIHMS132595-supplement-1_si_001.pdf [file NIHMS132595-supplement-1_si_001.pdf]
